# Congenital Adrenal Hyperplasia due to 21-Hydroxylase Deficiency\*

PERRIN C. WHITE AND PHYLLIS W. SPEISER

Division of Pediatric Endocrinology (P.C.W.), University of Texas Southwestern Medical Center, Dallas, Texas 75390-9063; and Division of Pediatric Endocrinology (P.W.S.), North Shore University Hospital and New York University School of Medicine, Manhasset, New York 11030

## ABSTRACT

More than 90% of cases of congenital adrenal hyperplasia (CAH, the inherited inability to synthesize cortisol) are caused by 21-hydroxylase deficiency. Females with severe, classic 21-hydroxylase deficiency are exposed to excess androgens prenatally and are born with virilized external genitalia. Most patients cannot synthesize sufficient aldosterone to maintain sodium balance and may develop potentially fatal “salt wasting” crises if not treated. The disease is caused by mutations in the CYP21 gene encoding the steroid 21-hydroxylase enzyme. More than 90% of these mutations result from intergenic recombinations between CYP21 and the closely linked CYP21P pseudogene. Approximately 20% are gene deletions due to unequal crossing over during meiosis, whereas the

remainder are gene conversions—transfers to CYP21 of deleterious mutations normally present in CYP21P. The degree to which each mutation compromises enzymatic activity is strongly correlated with the clinical severity of the disease in patients carrying it. Prenatal diagnosis by direct mutation detection permits prenatal treatment of affected females to minimize genital virilization. Neonatal screening by hormonal methods identifies affected children before salt wasting crises develop, reducing mortality from this condition. Glucocorticoid and mineralocorticoid replacement are the mainstays of treatment, but more rational dosing and additional therapies are being developed. (*Endocrine Reviews* 21: 245–291, 2000)

- I. Introduction
- II. Biochemistry of CAH
  - A. Biochemistry of normal steroid synthesis
  - B. Regulation of adrenal steroid secretion
  - C. Abnormal steroids in 21-hydroxylase deficiency
- III. Pathophysiology of CAH
  - A. Normal sexual differentiation
  - B. Normal prenatal development of adrenal glands
  - C. Adrenarche
  - D. Prenatal virilization
  - E. Salt wasting
  - F. Postnatal signs of androgen excess
  - G. Reproductive function in classic CAH
  - H. Neuropsychology of CAH
    - I. Tumors
    - J. Nonclassic CAH phenotypes
    - K. Heterozygotes
- IV. Diagnosis of 21-Hydroxylase Deficiency
  - A. Evaluation of ambiguous genitalia
  - B. Newborn screening
  - C. Further biochemical evaluation
- V. Treatment
  - A. Glucocorticoid replacement
  - B. Mineralocorticoid replacement
  - C. Other therapeutic approaches
  - D. Corrective surgery
  - E. Psychological counseling
- F. Treatment of precocious puberty
- G. Prenatal therapy
- VI. Molecular Genetic Analysis
  - A. Biochemistry of CYP21
  - B. Structure-function relationships
  - C. CYP21 gene structure
  - D. Transcription
  - E. HLA linkage
  - F. Mutations causing 21-hydroxylase deficiency
  - G. *De novo* recombinations
  - H. Mutation detection and approaches to prenatal diagnosis
    - I. Correlations between genotype and phenotype
    - J. Why is CAH so common?
- VII. Summary

## I. Introduction

**V**IRILIZING congenital adrenal hyperplasia (CAH) is the most common cause of genital ambiguity, and 90–95% of CAH cases are caused by 21-hydroxylase deficiency. Females affected with severe, classic 21-hydroxylase deficiency are exposed to excess androgens prenatally and are born with virilized external genitalia. First described in the mid-19th century, a more thorough understanding of this disease was not forthcoming until the mid-20th century, when the recessive nature of the genetic trait and identification of hormonal abnormalities were recognized (1).

The fundamental defect among patients with CAH due to 21-hydroxylase deficiency is that they cannot adequately synthesize cortisol. Inefficient cortisol synthesis signals the hypothalamus and pituitary to increase CRH and ACTH, respectively. Consequently, the adrenal glands become hyperplastic. But rather than cortisol, the adrenals produce excess sex

Address reprint requests to: Dr. Perrin C. White, Division of Pediatric Endocrinology, University of Texas Southwestern Medical Center, 5323 Harry Hines Boulevard, Dallas, Texas 75390-9063 USA.  
E-mail: pwhit2@mednet.swmed.edu

\* Supported by NIH Grant R37 DK-37867.

hormone precursors that do not require 21-hydroxylation for their synthesis. Once secreted, these hormones are further metabolized to active androgens—testosterone and dihydrotestosterone—and to a lesser extent estrogens—estrone and estradiol. The net effect is prenatal virilization of girls and rapid somatic growth with early epiphyseal fusion in both sexes. About three-quarters of patients cannot synthesize sufficient aldosterone to maintain sodium balance and are termed “salt wasters.” This predisposes them to episodically develop potentially life-threatening hyponatremic dehydration.

Patients with sufficient aldosterone production and no salt wasting who have signs of prenatal virilization and/or markedly increased production of hormonal precursors of 21-hydroxylase (e.g., 17-hydroxyprogesterone), are termed “simple virilizers.” In addition, a mild nonclassic form of the disorder is recognized in which affected females have little or no virilization at birth (Table 1).

It has now been 15 yr since the *CYP21* gene encoding the steroid 21-hydroxylase enzyme was demonstrated to be affected in patients with 21-hydroxylase deficiency (2), and it seemed an appropriate time to comprehensively review subsequent progress in understanding this disorder. References to earlier work can be found in previous reviews (1, 3–5).

## II. Biochemistry of CAH

### A. Biochemistry of normal steroid synthesis

The rate-limiting step in steroid biosynthesis is importation of cholesterol from cellular stores to the matrix side of

the mitochondria-inner membrane where the cholesterol side chain cleavage system (CYP11A, adrenodoxin, adrenodoxin reductase) is located. This is controlled by the steroidogenic acute regulatory (StAR) protein (6), the synthesis of which is increased within minutes by trophic stimuli such as ACTH or, in the zona glomerulosa, increased intracellular calcium. StAR is synthesized as a 37-kDa phosphoprotein that contains a mitochondrial importation signal peptide. However, importation into mitochondria is not necessary for StAR to stimulate steroidogenesis, and it now seems likely that, to the contrary, mitochondrial importation rapidly inactivates StAR (7). The mechanism by which StAR mediates cholesterol transport across the mitochondrial membrane is not yet known.

It is clear that StAR is not the only protein that mediates cholesterol transfer across the mitochondrial membrane. Another protein that appears necessary (but not sufficient, at least in the adrenals and gonads) for this process is the so-called peripheral benzodiazepine receptor, an 18-kDa protein in the mitochondrial outer membrane that is complexed with the mitochondrial voltage-dependent anion carrier in contact sites between the outer and inner mitochondrial membranes (8). This protein does not appear to be directly regulated by typical trophic stimuli, but it is stimulated by endozepines, peptide hormones also called diazepam-binding inhibitors. Endozepines may be regulated by ACTH to some extent, but not with a rapid time course. Thus far, it is not yet clear whether there is a direct physical

TABLE 1. Characteristics of different clinical forms of 21-hydroxylase deficiency

| Phenotype:                        | Classic salt wasting                                                                                      |               | Classic simple virilizing            |                      | Nonclassic                     |                                      |
|-----------------------------------|-----------------------------------------------------------------------------------------------------------|---------------|--------------------------------------|----------------------|--------------------------------|--------------------------------------|
|                                   | ♂                                                                                                         | ♀             | ♂                                    | ♀                    | ♂                              | ♀                                    |
| Age at diagnosis                  | Newborn-6m                                                                                                | Newborn-1m    | 2–4 y                                | Newborn-2 y          | Child-adult                    | Child-adult                          |
| Genitalia                         | Normal                                                                                                    | Ambiguous     | Normal                               | Ambiguous            | Normal                         | +/- ↑ clitoris                       |
| Aldosterone                       |                                                                                                           | ↓             |                                      | Normal               |                                | Normal                               |
| Renin                             |                                                                                                           | ↑             |                                      | May be ↑             |                                | Normal                               |
| Cortisol                          |                                                                                                           | ↓             |                                      | ↓                    |                                | Normal                               |
| 17-OH-progesterone                |                                                                                                           | >20,000 ng/dl |                                      | >10,000–20,000 ng/dl |                                | 1,500–10,000 ng/dl (ACTH-stimulated) |
| Testosterone                      | ↑ In pre-puberty only                                                                                     | ↑             | ↑ In pre-puberty only                | ↑                    | Variably ↑ in pre-puberty only | Variably ↑                           |
| Treatment                         | Glucocorticoid + mineralocorticoid (+ sodium)                                                             |               | Glucocorticoid (+ mineralocorticoid) |                      | Glucocorticoid, if symptomatic |                                      |
| Somatic growth <sup>a</sup>       | -2-3 SD, husky-obese                                                                                      |               | -1-2 SD                              |                      | ?-1 SD                         |                                      |
| Incidence <sup>b</sup>            | 1/20,000                                                                                                  |               | 1/60,000                             |                      | 1/1000                         |                                      |
| Typical mutations <sup>c</sup>    | Deletion<br>Large conversion<br>nt 656g (“intron 2 g”)<br>G110Δ8nt<br>I236N/V237E/M239K<br>Q318X<br>R356W |               | I172N<br>nt 656g                     |                      | V281L<br>P30L                  |                                      |
| % Enzymatic activity <sup>d</sup> | 0                                                                                                         |               | 1                                    |                      | 20–50                          |                                      |

<sup>a</sup> SD, Standard deviation scores.

<sup>b</sup> Incidence in general white population. See Table 3 for incidence of classic disease (salt wasting plus simple virilizing) from neonatal screening in various populations.

<sup>c</sup> See Table 4 and Section VI.F.

<sup>d</sup> Enzymatic activity predicted from *in vitro* expression studies (see Section VI.F).

interaction between StAR and the peripheral benzodiazepine receptor.

The first enzymatic step in steroid synthesis (Fig. 1) is the conversion of cholesterol, a C<sub>27</sub> compound, to the C<sub>21</sub> steroid pregnenolone (reviewed in Ref. 9). This is catalyzed by the mitochondrial cytochrome P450 enzyme CYP11A (P450 scc, cholesterol desmolase, side-chain cleavage enzyme; see Ref. 10 for further description of the CYP and P450 enzyme terminology). Pregnenolone is the common precursor for all other steroids and, as such, may undergo metabolism by several other enzymes.

To synthesize mineralocorticoids in the zona glomerulosa, 3β-hydroxysteroid dehydrogenase (3β-HSD) in the endoplasmic reticulum and mitochondria (11) converts pregnenolone to progesterone (12). This is 21-hydroxylated in the endoplasmic reticulum by CYP21 (P450c21, 21-hydroxylase) to produce deoxycorticosterone (DOC). Aldosterone, the most potent 17-deoxysteroid with mineralocorticoid activity, is produced by the 11β-hydroxylation of DOC to corticosterone (historically termed compound B), followed by 18-hydroxylation and 18-oxidation of corticosterone. The final three steps in aldosterone synthesis are accomplished by a single mitochondrial P450 enzyme, CYP11B2 (P450aldo, aldosterone synthase, reviewed in Ref. 13).

To produce cortisol, the major glucocorticoid in man, CYP17 (P450c17, 17α-hydroxylase/17, 20 lyase) in the en-

doplasmic reticulum of the zona fasciculata and zona reticularis converts pregnenolone to 17α-hydroxypregnenolone (14). 3β-Hydroxysteroid dehydrogenase in the zona fasciculata utilizes 17α-hydroxypregnenolone as a substrate, producing 17α-hydroxyprogesterone. The latter is 21-hydroxylated by CYP21 to form 11-deoxycortisol, which is converted to cortisol by CYP11B1 (P450c11, 11β-hydroxylase) in mitochondria.

In the zona reticularis of the adrenal cortex and in the gonads, the 17,20-lyase activity of CYP17 converts 17α-hydroxypregnenolone to dehydroepiandrosterone (DHEA, a C<sub>19</sub> steroid and sex hormone precursor). DHEA is further converted by 3β-HSD to androstenedione. In the gonads, this is reduced by 17β-hydroxysteroid dehydrogenase to testosterone [there are several isozymes of 17β-hydroxysteroid dehydrogenase, some of which possess both oxidative and reductive activity (15)]. In pubertal ovaries, aromatase (CYP19, P450c19) can convert androstenedione and testosterone to estrone and estradiol, respectively (16). Testosterone may be further metabolized to dihydrotestosterone by steroid 5α-reductase in androgen target tissues (17).

## B. Regulation of adrenal steroid secretion

1. *Cortisol secretion.* Cortisol secretion is regulated mainly by ACTH. ACTH is a 39-amino acid peptide that is produced in

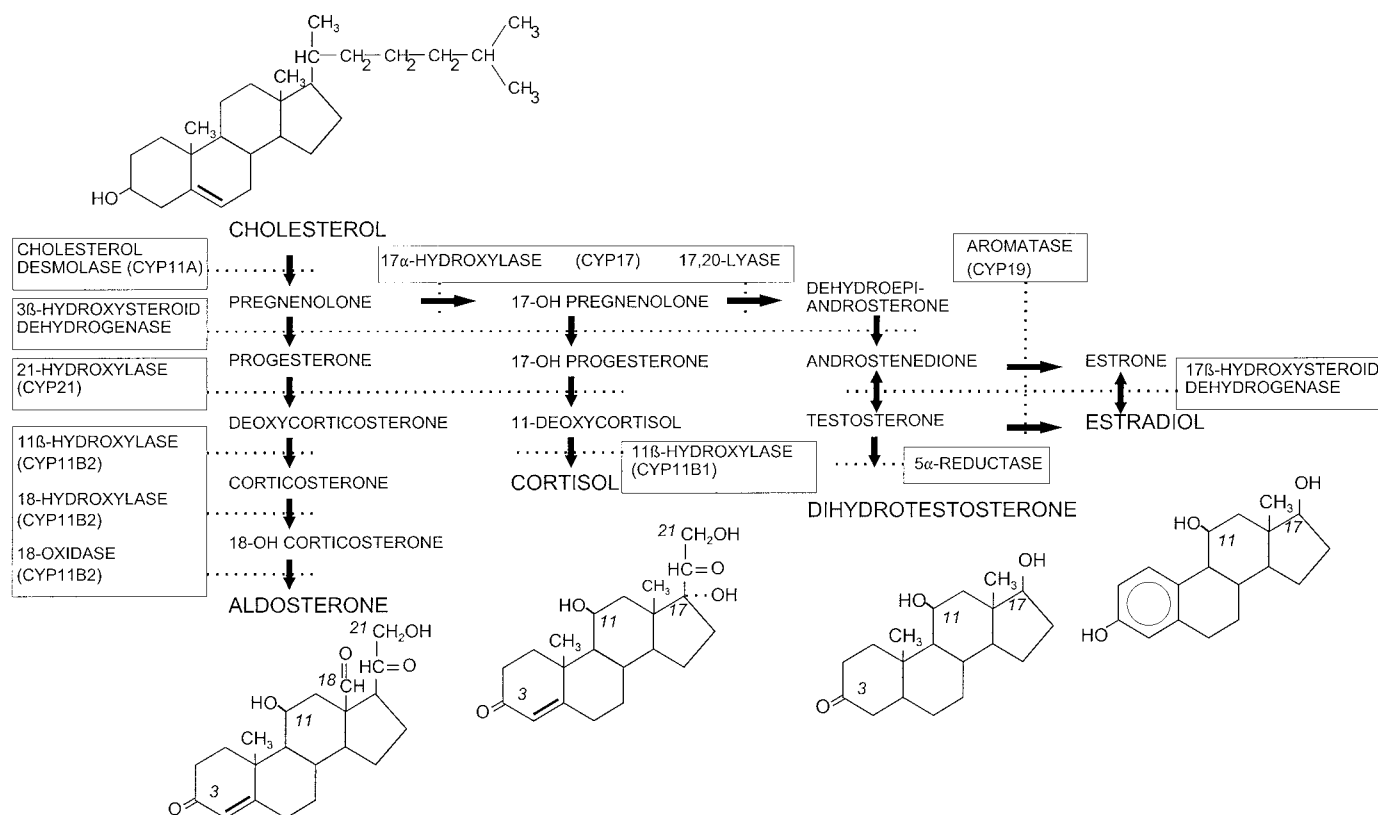

FIG. 1. Pathways of steroid biosynthesis. The pathways for synthesis of progesterone and mineralocorticoids (aldosterone), glucocorticoids (cortisol), androgens (testosterone and dihydrotestosterone), and estrogens (estrone and estradiol) are arranged from left to right. The enzymatic activities catalyzing each bioconversion are written in boxes. For those activities mediated by specific cytochromes P450, the systematic name of the enzyme ("CYP" followed by a number) is listed in parentheses. CYP11B2 and CYP17 have multiple activities. The planar structures of cholesterol, aldosterone, cortisol, dihydrotestosterone, and estradiol are placed near the corresponding labels.

the anterior pituitary. It is synthesized as part of a larger mol wt precursor peptide, POMC. This peptide is also the source of  $\beta$ -lipotropin ( $\beta$ -LPH). In addition, ACTH and  $\beta$ -LPH are cleaved further to yield  $\alpha$ -MSH and  $\beta$ -MSH,  $\gamma$ -LPH,  $\beta$ - and  $\gamma$ -endorphin, and enkephalin. The POMC precursor peptide is found in a variety of extrahypothalamic tissues, including the gastrointestinal tract, numerous tumors, and the testis. It is secreted in small amounts from the anterior pituitary gland and does not bind significantly to the ACTH receptor. Another pro-ACTH fragment, corticotropin-like intermediate lobe peptide (CLIP), is made in the rodent anterior pituitary, but not in the normal human pituitary (18).

ACTH acts through a specific G protein-coupled receptor to increase levels of cAMP (19). cAMP has short-term (minutes to hours) effects on cholesterol transport into mitochondria (6) but longer term (hours to days) effects on transcription of genes encoding the enzymes required to synthesize cortisol (20). The transcriptional effects occur, at least in part, through increased activity of protein kinase A, but it is not known whether the targets of this kinase act directly or indirectly on *CYP21* (see Section VI.D.3). ACTH also influences the remaining steps in steroidogenesis as well as the uptake of cholesterol from plasma lipoproteins. It also maintains the size of the adrenal glands. In addition to these effects on the adrenal gland, it stimulates melanocytes and results in hyperpigmentation when secreted in excess, as occurs in Addison's disease.

CRH is the principal hypothalamic factor that stimulates the pituitary production of ACTH (21, 22). Vasopressin, a peptide product of the posterior pituitary gland, also stimulates ACTH release by acting synergistically with CRH and is an important physiological regulator of ACTH (23). CRH is produced in the paraventricular nuclei of the hypothalamus and is also found in other parts of the central nervous system and in other locations such as peripheral leukocytes. Paracrine action of hypothalamic peptides, e.g., vasoactive intestinal polypeptide (VIP) and pituitary adenylate cyclase-activating polypeptide (PACAP), plays a role in CRH release (24). Hypothalamic CRH is transported to the anterior pituitary cells by the hypophysial portal vessels. CRH activates ACTH secretion via a specific receptor coupled to cAMP-dependent signaling. CRH is secreted in a pulsatile fashion that results in the episodic secretion of ACTH and in the diurnal variation of cortisol secretion. The magnitude of the cortisol response to each ACTH burst remains relatively constant. Therefore, it is the number of secretory periods, rather than the magnitude of each pulse of CRH and ACTH, that determines the total daily cortisol secretion.

Numerous factors, such as metabolic, physical, or emotional stress, influence levels of glucocorticoid secretion, mediated by ACTH secreted in response to hypothalamic secretion of CRH and vasopressin. As noted above, paracrine action of various peptides may contribute to modulation of hormone production in the hypothalamus, pituitary, and adrenal. Cortisol is the primary negative regulator of resting activity of the hypothalamic-pituitary-adrenal (HPA) axis through negative feedback on ACTH and CRH secretion. Furthermore, it may inhibit some of the higher cortical activities that lead to CRH stimulation.

The negative feedback effects of cortisol are exerted at the level of both the hypothalamus and the pituitary and are mediated by Type II corticosteroid receptors (i.e., classic glucocorticoid receptors) (25).

Whether and to what extent direct glucocorticoid feedback on the adrenal cortex itself regulates cortisol synthesis is unclear. *In vitro* studies using rat adrenocortical cells suggest that corticosterone may act to inhibit steroidogenesis (26). Northern blotting demonstrates that glucocorticoid receptors are expressed in human adrenals (27), but a physiological role in direct negative regulation of cortisol secretion has not been demonstrated.

2. *Aldosterone secretion.* The rate of aldosterone synthesis, which is normally 100- to 1,000-fold less than that of cortisol synthesis, is regulated mainly by angiotensin II and potassium levels, with ACTH having only a short-term effect (28). Angiotensin II occupies a G protein-coupled receptor-activating phospholipase C (29). The latter protein hydrolyzes phosphatidylinositol bisphosphate to produce inositol triphosphate and diacylglycerol, which raise intracellular calcium levels and activate protein kinase C and calmodulin dependent protein (CaM) kinases. Similarly, increased levels of extracellular potassium depolarize the cell membrane and increase calcium influx through voltage-gated L-type calcium channels (30). Phosphorylation of as yet unidentified factors by CaM kinases increases transcription of the aldosterone synthase (*CYP11B2*) enzyme required for aldosterone synthesis (28); as yet, the pathways influencing 21-hydroxylase (*CYP21*) expression in the zona glomerulosa have not been elucidated.

### C. Abnormal steroids in 21-hydroxylase deficiency

1. *Elevated 17-hydroxyprogesterone.* The most characteristic biochemical abnormality in 21-hydroxylase deficiency is elevation of 17-hydroxyprogesterone (17-OHP), the main substrate for the enzyme. Basal serum 17-OHP values usually exceed 10,000 ng/dl, although about 10% of severely affected infants have low initial levels in the newborn period (31), especially if levels are obtained on the first day of life. Differentiation of 21-hydroxylase deficiency from other forms of CAH may be accomplished by both clinical features of the disease (Table 2) and by the complete adrenocortical hormone profile comparing precursor to product ratios after ACTH stimulation. It is important to realize that without a complete adrenocortical profile, other steroidogenic defects—both 3 $\beta$ -HSD (32) and 11 $\beta$ -hydroxylase deficiency (34)—may be misdiagnosed as 21-hydroxylase deficiency. This has significant bearing on medical therapy since 11 $\beta$ -hydroxylase patients are often hypertensive and require specific therapy for this problem. Moreover, these assays should be performed in laboratories with high standards for quality control, including preliminary chromatography, to avoid problems of cross-reactivity when some hormone levels are extremely high (33). This can be a serious concern when the choice of laboratory is limited in a managed care environment.

The highest 17-OHP levels (up to 100,000 ng/dl after ACTH stimulation) are seen in patients with the salt wasting form of the disease. Simple virilizing patients tend to

TABLE 2. Characteristics of different forms of congenital adrenal hyperplasia

| Disease               | 21-Hydroxylase deficiency | 11 $\beta$ -Hydroxylase deficiency | Aldosterone synthase deficiency           | 17 $\alpha$ -Hydroxylase deficiency | 3 $\beta$ -Hydroxysteroid dehydrogenase deficiency | Lipoid hyperplasia        |
|-----------------------|---------------------------|------------------------------------|-------------------------------------------|-------------------------------------|----------------------------------------------------|---------------------------|
| Defective gene        | <i>CYP21</i>              | <i>CYP11B1</i>                     | <i>CYP11B2</i>                            | <i>CYP17</i>                        | <i>HSD3B2</i>                                      | <i>STAR</i>               |
| Alias                 | P450c21                   | P450c11                            | P450aldo                                  | P450c17                             | 3 $\beta$ -HSD                                     |                           |
| Chromosomal location  | 6p21.3                    | 8q24.3                             | 8q24.3                                    | 10q24.3                             | 1p13.1                                             | 8p11.2                    |
| Ambiguous genitalia   | + in ♀                    | + in ♀                             | No                                        | + in ♂<br>No puberty in ♀           | + in ♂<br>Mild in ♀                                | + in ♂<br>No puberty in ♀ |
| Addisonian crisis     | +                         | Rare                               | Salt wasting only                         | No                                  | +                                                  | ++                        |
| Incidence (gen. pop.) | 1:10–18,000               | 1:100,000                          | Rare                                      | Rare                                | Rare                                               | Rare                      |
| Hormones              |                           |                                    |                                           |                                     |                                                    |                           |
| Glucocorticoids       | ↓                         | ↓                                  | Normal                                    | Corticosterone normal               | ↓                                                  | ↓                         |
| Mineralocorticoids    | ↓                         | ↑                                  | ↓                                         | ↑                                   | ↓                                                  | ↓                         |
| Androgens             | ↑                         | ↑                                  | Normal                                    | ↓                                   | ↓ in ♂<br>↑ in ♀                                   | ↓                         |
| Estrogens             | Relatively ↓ in ♀         | Relatively ↓ in ♀                  | Normal                                    | ↓                                   | ↓                                                  | ↓                         |
| Physiology            |                           |                                    |                                           |                                     |                                                    |                           |
| Blood pressure        | ↓                         | ↑                                  | ↓                                         | ↑                                   | ↓                                                  | ↓                         |
| Na balance            | ↓                         | ↑                                  | ↓                                         | ↑                                   | ↓                                                  | ↓                         |
| K balance             | ↑                         | ↓                                  | ↑                                         | ↓                                   | ↑                                                  | ↑                         |
| Acidosis              | +                         | ± Alkalosis                        | +                                         | ± Alkalosis                         | +                                                  | +                         |
| Elevated metabolites  | 17-OHP                    | DOC, 11-deoxycortisol              | Corticosterone, ±18-hydroxycorticosterone | DOC corticosterone,                 | DHEA, 17 $\Delta^5$ Preg                           | None                      |
| Reference             |                           | (13)                               | (13)                                      | (14)                                | (15)                                               | (6)                       |

17-OHP, 17-Hydroxyprogesterone; DOC, deoxycorticosterone; DHEA, dehydroepiandrosterone; 17 $\Delta^5$ Preg, 17- $\Delta^5$ -hydroxypregnenolone.

have somewhat lower levels, although the range overlaps that seen in salt wasting patients (34). The milder, nonclassic form of CAH manifests even less markedly elevated hormone levels, especially in the newborn period. Nonclassic patients are most reliably diagnosed by their response to ACTH stimulation (35); random measurements of basal serum 17-OHP may be normal in mildly affected nonclassic patients unless performed in the early morning (*i.e.*, before 0800 h). Compound heterozygotes for classic and nonclassic *CYP21* mutations (see *Section VI.F*) tend to have somewhat higher ACTH-stimulated 17-OHP levels than individuals homozygous for nonclassic mutations (36). Hormonal testing is not very sensitive for identification of heterozygotes when 17-OHP is used as a marker. In one study, only 50% of obligate heterozygotes had 17-OHP measurements after ACTH stimulation that differed from those of genotypically normal individuals (37). Heterozygotes are more readily identified when one examines the ratio of 17-OHP to cortisol (38).

2. *Other abnormal steroids.* Other hormones that are elevated in untreated CAH include progesterone, androstenedione, and, to a lesser extent, testosterone. An abnormal steroid, 21-deoxycortisol, is characteristically elevated (39–41). DHEA, the main adrenal 19-carbon steroid product, is not a good marker of 21-hydroxylase ac-

tivity. DHEA-sulfate (DHEAS) binds with high affinity to albumin, has a long plasma half-life, and as such is not very responsive to acute ACTH stimulation. Diagnostic assays are discussed in *Section IV.C*.

### III. Pathophysiology of CAH

#### A. Normal sexual differentiation

Early in gestation, the gonads are indifferent and bipotential (Fig. 2). During the 7th week, the male gonads begin to differentiate under the influence of a cascade of testis-determining genes (reviewed in Refs. 42 and 43). In contrast, the recently characterized signaling molecule WNT-4 plays an active role in ovarian development (44). Ovaries are recognizable at about 10 weeks. If there is no secretion of anti-Müllerian hormone (AMH), a glycoprotein factor synthesized by the Sertoli cells of the testis (45), development of the Müllerian ducts proceeds and female internal structures—the Fallopian tubes, uterus, cervix and upper vagina—are formed (Figs. 3 and 4). In contrast, development of male genital structures derived from the Wolffian ducts, including the epididymis, ductus deferens, ejaculatory ducts, and seminiferous tubules, requires high local concentrations of testosterone secreted from

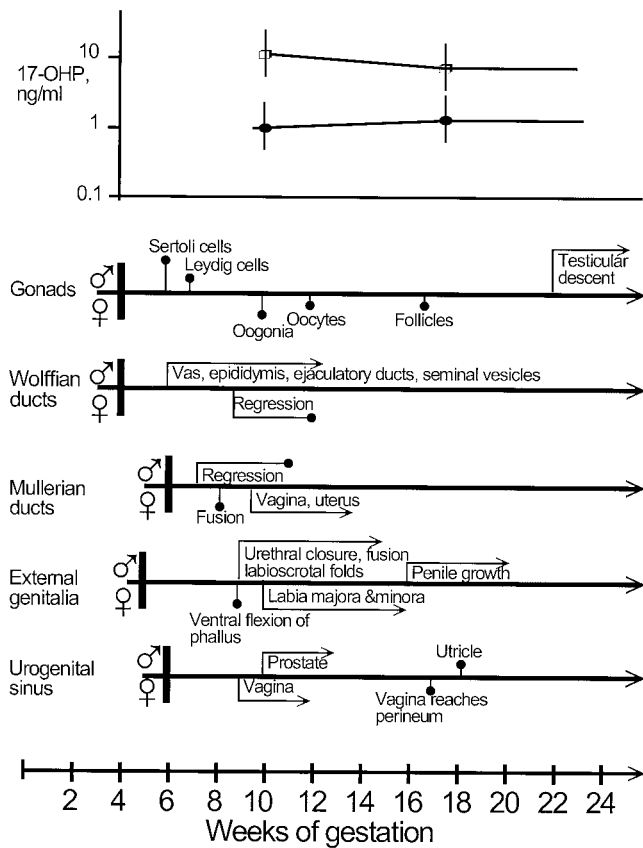

FIG. 2. Time course of prenatal sexual differentiation in male and female fetuses. *Top*, Amniotic fluid levels of 17-OHP at various ages of gestation. The scale is logarithmic. *Open squares* denote mean values in fetuses affected with 21-hydroxylase deficiency, and *closed circles* denote mean values in normal infants. *Vertical lines* denote 95% confidence limits [adapted from Ref. 500]. *Bottom*, Timelines for five aspects of sexual differentiation [adapted from Ref. 541]. Note that 17-OHP levels are already markedly elevated in affected fetuses during development of the external genitalia.

Leydig cells of the testis beginning at about 7 weeks; in the absence of testosterone, Wolffian ducts regress. External genital structures are also bipotential in early gestation and differentiate as male under the influence of  $5\alpha$ -dihydrotestosterone (reviewed in Ref. 17), which must interact with an intact androgen receptor (Figs. 3 and 4)(46).

### B. Normal prenatal development of adrenal glands

The adrenal cortex is formed from mesoderm derived from coelomic epithelium in the 4th week of gestation. By the 6th to 7th week, steroids are secreted by the provisional zone, the functional cortex in fetal life (47). The provisional cortex supplies DHEA sulfate to the fetal liver, where it undergoes  $16\alpha$ -hydroxylation; the placenta utilizes  $16\alpha$ -DHEAS to produce estriol (48), a traditional marker of fetal viability. The permanent, or adult, adrenal cortex is formed in the 9th to 10th week by a second migration of cells that surround the fetal cortex. At term, the fetal cortex is approximately 10 times the size of the adult cortex, weighing about the same as adult adrenals, or up to 10 g, but it involutes rapidly in the neonatal period (49). There-

after, the permanent cortex assumes the steroidogenic functions and develops the three-zoned organization of the adult gland. Several transcription factors are known to be critical for adrenal development. Steroidogenic factor-1 (SF-1, also called Ad4BP, reviewed in Ref. 50), induces genes involved in steroid synthesis, and is in turn negatively regulated by DAX-1, the gene affected in congenital adrenal *hypoplasia* (51). Human fetal adrenal development is regulated primarily by fetal pituitary ACTH. ACTH is not a mitogen *per se*; rather its actions on the fetal adrenal cortex are mediated in autocrine/paracrine fashion by several growth factors. In cultured human fetal adrenal cortical cells, epidermal growth factor (EGF), basic fibroblast growth factor (bFGF), human CG (hCG), and insulin-like growth factors I and II (IGF-I and -II) are mitogenic, whereas activin and transforming growth factor- $\beta$  (TGF $\beta$ ) inhibit proliferation. IGF-II, activin, and TGF $\beta$  also modulate ACTH-stimulated steroidogenesis (reviewed in Ref. 49). In the absence of ACTH, as in anencephaly, the fetal adrenal involutes in the second trimester (52).

In addition, catecholamines and neuropeptides secreted by the adrenal medulla, as well as direct innervation of the adrenal cortex, may influence development of the cortex (reviewed in Ref. 53).

Anatomic hyperplasia of the adrenal is not seen invariably in steroid 21-hydroxylase deficiency (54). The diagnostic utility of ultrasound diagnosis of CAH may be improved, at least in neonates, by examining not only size but also shape, surface contours, and echogenicity (55). Steroid treatment can reverse the structural abnormalities seen with sonography (55).

Anatomic and physiological data indicate that the hypothalamic-pituitary-adrenal axis does not function until about the eighth week of gestation. Experience with prenatal treatment of CAH (see below, *Section V.G*), however, suggests that dexamethasone must be administered to the pregnant woman at risk for an affected child as early as possible in the first trimester if virilization of an affected girl is to be prevented. What, then, is the mechanism for dexamethasone's early action? Is there another ACTH-independent glucocorticoid feedback pathway responsible for fetal adrenal steroid production? Could dexamethasone exert direct suppressive effects on the fetal adrenal? These questions remain unanswered.

### C. Adrenarche

Beginning at 5–8 yr of age, there is an increase in the size of the zona reticularis, correlating with a rise in serum DHEAS and a modest increase in linear growth rate (56). This process, termed adrenarche, occurs independently of changes in ACTH, cortisol, or aldosterone production. Although there has been speculation about a separate adrenal androgen-stimulating hormone (57), no such factor has been identified. Premature adrenarche with mildly elevated DHEAS and more marked elevation of 17-OHP is a known manifestation of untreated nonclassic CAH (58). On the other hand, DHEAS is suppressed in treated children with classic CAH (59), probably due to exogenous glucocorticoid suppression of the adrenal (60).

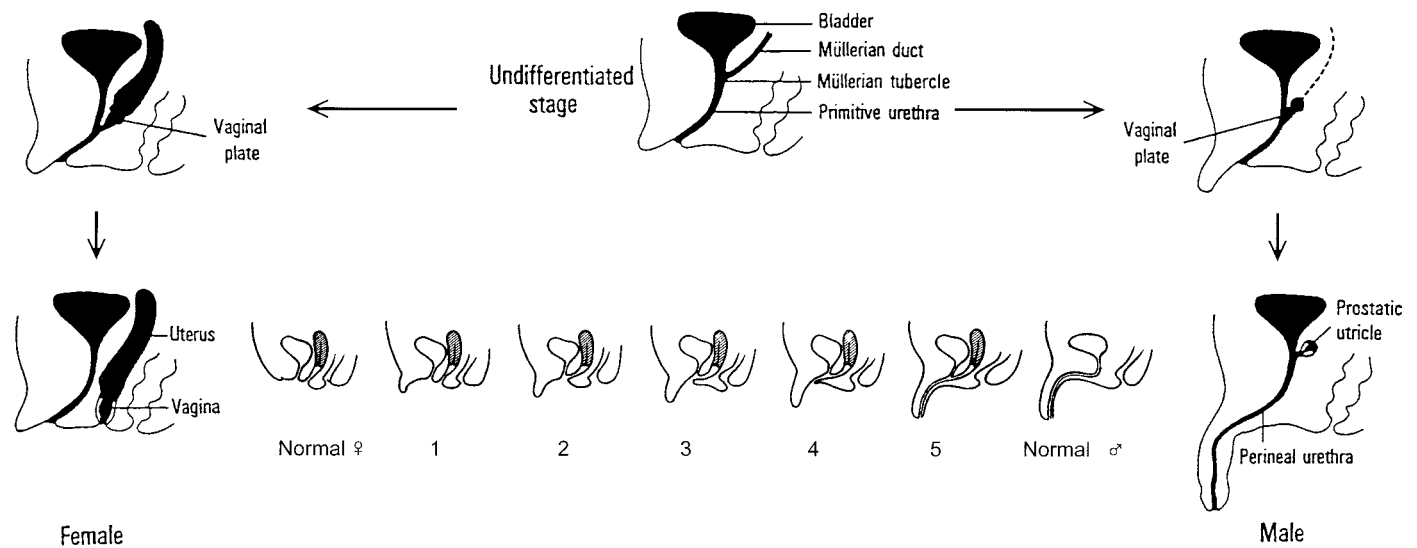

FIG. 3. Normal and abnormal differentiation of the urogenital sinus and external genitalia (cross-sectional view). Diagrams of normal female and male anatomy flank a series of schematic representations of different degrees of virilization of females, graded using the scale developed by Prader (64). [Adapted from Refs. 64 and 213]. Note that the uterus persists in virilized females even when the external genitalia have a completely masculine appearance (Prader grade 5).

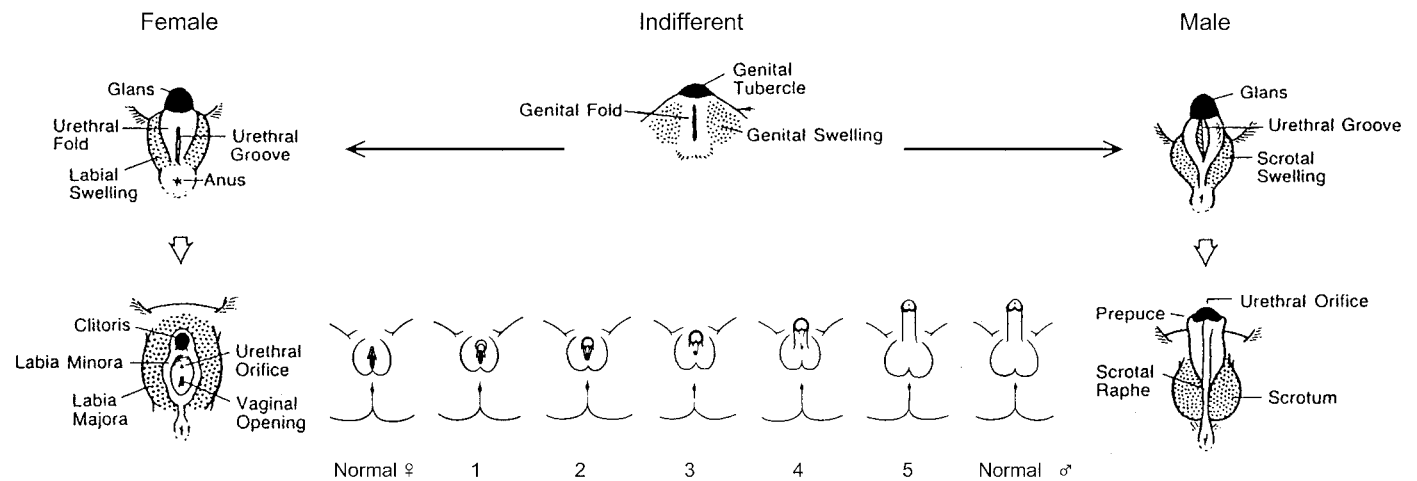

FIG. 4. Normal and abnormal differentiation of the external genitalia (external view). Diagrams of normal female and male anatomy flank a series of schematic representations of different degrees of virilization, graded using the scale developed by Prader (64). [Adapted from Refs. 64 and 213].

*D. Prenatal virilization*

Adrenal secretion of excess androgen precursors does not significantly affect male sexual differentiation. In females affected with CAH, however, the urogenital sinus is in the process of septation when the fetal adrenal begins to produce excess androgens; levels of circulating adrenal androgens are apparently sufficiently high to prevent formation of separate vaginal and urethral canals. Further interference with normal female genital anatomy occurs as adrenal-derived androgens interact with genital skin androgen receptors and induce clitoral enlargement, promote fusion of the labial folds, and cause rostral migration of the urethral/vaginal perineal orifice. However, internal Wolffian structures, such as the prostate gland and spermatic ducts, are usually not virilized, presumably because development of the Wolffian

ducts requires markedly higher focal concentrations of testosterone than the external genitalia. This is supported by animal studies showing that unilateral castration causes ipsilateral mesonephric duct involution (61). Nevertheless, severely affected females may occasionally have some development of typically male internal genital structures; carcinoma of prostate tissue has been reported in an affected female (62).

Thus, the typical result in severely affected girls is ambiguous or male-appearing external genitalia with perineal hypospadias, chordee, and undescended testes (63). The severity of virilization is often quantitated using a five-point scale developed by Prader (Figs. 3 and 4) (64). Not all classic CAH females develop the same degree of genital ambiguity. One might speculate that the physical signs of androgen

excess are dependent not only on direct adrenal secretion of androgen precursors, but also on the efficiency with which such hormones are converted to more potent products, such as dihydrotestosterone by peripheral enzymes such as 5 $\alpha$ -reductase (17). Additionally, the concentration (65) and transcriptional activity (66) of androgen receptors (both of which are influenced by a highly polymorphic CAG repeat sequence within the coding region) may play a further role in determining genital phenotype.

As another presumed effect of prenatal exposure to excess androgens, both male and female affected infants are longer than average at birth (67). Moreover, infant girls with CAH have higher than typical LH levels—into the range expected for healthy infant boys—presumably due to exposure to higher than normal levels of prenatal androgens and/or other sex hormones (68). Although there have been no studies of LH pulsatility or responsiveness to GnRH in infants with CAH, women with well controlled classic CAH, but not those with nonclassic CAH, have exaggerated LH responses to GnRH and increased production of ovarian androgens. This is consistent with the idea that early exposure to androgens or progestins causes permanent abnormalities in the hypothalamic-pituitary-gonadal axis in CAH women (69) (see Section III.G).

#### E. Salt wasting

Among classic CAH patients, about three-fourths cannot synthesize adequate amounts of aldosterone due to severely impaired 21-hydroxylation of progesterone. Aldosterone is essential for normal sodium homeostasis; deficiency of this hormone results in sodium loss via the kidney, colon, and sweat glands (70).

Severely affected patients invariably have concomitant cortisol deficiency that exacerbates the effects of aldosterone deficiency. Glucocorticoids normally increase cardiac contractility, cardiac output, sensitivity of both the heart and the vasculature to the pressor effects of catecholamines and other pressor hormones, and work capacity of skeletal muscles (71). In the absence of glucocorticoids, cardiac output decreases. This decreases glomerular filtration, leading to an inability to excrete free water and consequent hyponatremia. Thus, shock and severe hyponatremia are much more likely in 21-hydroxylase deficiency, in which both cortisol and aldosterone biosynthesis are affected, than in (for example) aldosterone synthase deficiency, in which only one biosynthetic pathway is impaired (72).

Although catecholamine secretion has not, to our knowledge, been studied in patients with CAH, high levels of glucocorticoids are required for normal development of the adrenal medulla and for expression of the enzymes required to synthesize catecholamines (73). Indeed, mice with 21-hydroxylase deficiency exhibit abnormal development of the adrenal medulla and secrete reduced levels of catecholamines (74). Catecholamine deficiency could further exacerbate the shock engendered by glucocorticoid and mineralocorticoid deficiency.

In addition, accumulated steroid precursors may directly antagonize the mineralocorticoid receptor and exacerbate mineralocorticoid deficiency, particularly in untreated patients (75). Progesterone is well known to have antiminer-

alocorticoid effects (76–79), and it and/or a metabolite are likely culprits in this phenomenon. However, there is as yet no evidence that 17-OHP has direct or indirect antiminer-  
alocorticoid effects.

Salt wasting may include such nonspecific symptoms as poor appetite, vomiting, lethargy, and failure to gain weight. Severely affected patients with CAH usually present at 1–4 weeks of age with hyponatremia, hyperkalemia, hyperreninemia (see Section IV.C.2) and hypovolemic shock. These “adrenal crises” may prove fatal if proper medical care is not delivered. This problem is particularly critical in infant boys who have no genital ambiguity to alert physicians to the diagnosis of CAH before the onset of dehydration and shock (80). The mortality rate for CAH remains high in such patients, as suggested by the relative paucity of male patients identified in case reports (81). It is for this reason that many states in the United States and a number of countries have adopted newborn screening for CAH (see Section IV.B).

The rapidity of onset and severity of a salt wasting crisis may reflect the individual’s ancillary homeostatic mechanisms for sodium and fluid conservation. Such factors might include the concentration and transcriptional activity of mineralocorticoid receptors in the kidney and elsewhere, and the ability to increase vasopressin or decrease atrial natriuretic factor (82) in response to volume contraction.

Siblings may be discordant for salt wasting (83). Furthermore, CAH patients known to have severe salt wasting episodes in infancy and early childhood may show improved sodium balance and relatively more efficient aldosterone synthesis with age. Unrelated individuals carrying identical mutations may manifest different degrees of salt wasting (84). Although explanations for these observations are not immediately apparent, both genetic and nongenetic factors may contribute to the presence or absence of the salt wasting trait. Extraadrenal 21-hydroxylase has been detected by *in vivo* metabolic studies (85), but molecular genetic investigation has yielded contradictory results as to whether CYP21 could be a source for this activity (86–89). Other enzymes with 21-hydroxylase activity have not been identified in humans, although such enzymes have been identified in rabbit liver (90).

#### F. Postnatal signs of androgen excess

Ongoing adrenal sex steroid production in the untreated or incompletely treated patient causes several problems. Boys have inappropriately rapid somatic growth with advancement of epiphyseal maturation, although this may not be apparent in the first 18 months of life (91). Pubic hair and apocrine body odor develop, and penile size increases without testicular enlargement.

Girls may show similar signs of sex steroid excess as well as progressive clitoral enlargement. In adolescence, poorly controlled girls manifest acne, hirsutism, and ovarian dysfunction (see below).

There is considerable interindividual variation in pre- and postnatal signs of androgen excess. This may be attributed directly to differences in the absolute levels of androgen precursors secreted by the affected adrenals, or to the efficiency of conversion of precursors to more potent androgens.



Alternatively, variations in androgen receptor expression or activity may contribute to phenotype. For example, expansion of the CAG repeat sequence in exon 1 results in decreased androgen receptor transactivation of target DNA sequences (66). In a correlative study, higher hirsutism scores correlated with fewer CAG repeats in women with idiopathic hirsutism (92).

Although childhood somatic growth is excessive in CAH patients (67), adult height is often suboptimal compared with the surrounding healthy population and with parentally determined target height (93–99). Whereas untreated patients grow rapidly, patients treated with excessive doses of glucocorticoids may suffer growth retardation. This is discussed below in *Section V.A*.

Although androstenedione is elevated, DHEAS is suppressed in CAH children (59). This is likely due to exogenous glucocorticoid suppression of the adrenal (60). An adrenal androgen-stimulating hormone (AASH) separate from ACTH has been postulated (100), but this hypothesis cannot be tested in any definitive manner based on data from CAH patients.

### G. Reproductive function in classic CAH

1. *Females*. Reproductive problems for women with CAH become apparent in adolescence. The average age at which menarche occurs in inadequately treated girls is late compared with healthy peers (101). Such girls and women with CAH often have a clinical picture similar to polycystic ovarian syndrome with sonographic evidence of multiple cysts, anovulation, irregular bleeding, and hyperandrogenic symptoms (102). Moreover, a significant reduction in insulin sensitivity, although not clinical diabetes, is found among young women with nonclassic CAH as compared with controls of similar age and weight (103).

The basis for these problems is not precisely known. Several hypotheses have been advanced: 1) Hypothalamic aromatization of excess adrenal androstenedione might interfere with LH-releasing hormone secretion (104). 2) Excess adrenal progesterone might act as a “mini-pill” to inhibit normal cyclicality (101), or it might antagonize estrogen effects (101, 105). 3) Elevated progestins or sex steroids could induce abnormal ovarian function by programming the hypothalamus early in development (69). 4) Androgen excess might directly damage the ovaries. 5) Adrenal rest tissue might displace normal gonadal parenchyma.

The majority of women with CAH eventually undergo menarche. In general, the regularity of menses depends on the adequacy of treatment. A small proportion of women do not undergo menarche and are unable to suppress progesterone levels even when 17-OHP is adequately suppressed (105).

Furthermore, breast development is suppressed in females with CAH. Evidence from animal studies suggests that testosterone exposure *in utero* may also suppress the breast anlage, resulting in poor breast development at adolescence (106). However, this problem is apparently due mainly to the combined effects of androgen excess and cortisol deficiency, because it is reversible with treatment (107, 108).

Pregnancy outcome in classic CAH has been recently re-

viewed. During pregnancy, women are optimally managed with hydrocortisone or prednisone (109, 110). Due to pregnancy-induced alterations in steroid metabolism and clearance, doses need to be increased compared with doses used in nonpregnant women with CAH. It should be recognized that in this situation, treatment is directed at the mother and not at the fetus, for hydrocortisone and prednisone do not effectively cross the placenta. Interestingly, despite elevated maternal testosterone of 400–600 ng/dl, unaffected female offspring appear to have no genital virilization (109). Apparently, placental aromatase effectively prevents maternal androgens from reaching the fetus. Elevated maternal sex hormone-binding globulin (111) and androgen antagonism by progesterone (112) may also restrict transplacental passage of androgens.

There is no evidence of an excess of congenital malformations in offspring of women with CAH.

2. *Males*. Men with CAH less frequently have impaired gonadal function compared with affected women. Most affected males are able to father children or at least have normal sperm counts (113). Low sperm counts, when they occur, do not always preclude fertility (114). Among simple virilizing patients, testicular integrity may be normal even in the absence of treatment (115).

A prominent complication in CAH males is the development of testicular adrenal rests (116). This is discussed in *Section III.I.2*.

### H. Neuropsychology of CAH

1. *Cognitive effects*. Although there have been occasional reports of elevated IQ among CAH patients (117), this has not been generally observed. To the contrary, salt wasting patients who suffer hyponatremic dehydration and shock may sustain permanent brain injury with resultant lower cognitive test scores (118–120). Certain sexually dimorphic cognitive abilities, such as spatial abilities, may be enhanced among CAH girls (121–123). Females with CAH are more likely to be left-handed (as are males) (124) but do not differ from unaffected women in degree of cerebral lateralization (125). Magnetic resonance imaging showed white matter abnormalities in the brains of CAH patients more often (117, 126) than in controls in two of three recent studies (127). Thus, neurodevelopmental evaluation is warranted in children with CAH. Patients who have experienced severe hyponatremia should be considered for enrollment in early intervention programs if neurodevelopmental milestones are delayed.

2. *Effects on gender role and identity*. The influence of prenatal sex steroid exposure on personality is controversial (reviewed in Refs. 128–132); also see *Sections V.D* and *V.E*). In considering this question, it is important to distinguish between gender role, sexual orientation, and gender identity.

Gender role refers to gender-stereotyped behaviors such as choice of play toys by young children. Parents of young girls with CAH often report that their daughters prefer to play with trucks as compared with dolls. Indeed, low interest in maternal behavior, beginning with infrequent doll play in early childhood and extending to lack of interest in child

rearing for older girls and women, is a recurring theme in CAH research (133–136). Some investigators have noted tomboyish (137) or aggressive (138) behavior among girls with CAH or a male pattern of distance in social relations (139). Others have found that young patients do not differ significantly from controls for nine parameters of psychopathology including aggression and hyperactivity (140); older girls or women with CAH have tested similarly (133, 141). The amygdala, an androgen-sensitive brain center controlling fear and aggression, is smaller by MRI among children with CAH (142); these MRI-based structural differences have not yet been directly correlated with psychological testing.

Sexual orientation refers to homosexual *vs.* heterosexual preferences. In most studies, a small but significant percentage of adult women with CAH have been actively homosexual or bisexual or have an increased tendency to homoerotic fantasies (143–145). These characteristics occur more frequently in women with the salt wasting form of 21-hydroxylase deficiency. A review of German patients found no increase in homosexuality among affected women but did find a decreased frequency of marriage and childbearing, suggesting more general psychosocial dysfunction among patients (146).

Gender identity refers to self-identification as male or female. Spontaneous gender reassignment back to male has been reported in cases of males with penile trauma who were raised as females (147, 148) or male pseudohermaphrodites raised as females, especially in cases of 5 $\alpha$ -reductase or 17-ketosteroid reductase deficiencies, in which the brain may be exposed to high circulating levels of androgens (reviewed in Ref. 132). Conversely, female-to-male transsexuals may have relatively high levels of androgens and a high incidence of polycystic ovary syndrome (149). However, self-reassignment to the male sex is unusual in women with CAH (145, 150). When it occurs, it may be related to delays in gender assignment or genital surgery or to inadequate suppression of adrenal androgens with glucocorticoid therapy (151). Severely virilized females are more likely to be raised as males in cultures that value boys more highly and/or in third world countries in which the diagnosis is likely to be delayed (152–154). There have been few studies directly comparing psychosexual functioning in severely virilized genetic females with CAH raised as women or men, but it does not appear that those raised as men are psychologically better adjusted than those raised as women (155).

The uncertainty concerning the effects of prenatal and postnatal effects of androgen on gender identity and gender role extends not only to the female CAH population, but also to male pseudohermaphrodites of other etiologies. The role of external genital anatomy before and after genital surgery in fueling problems relating to gender is unclear compared with the roles of prenatal hormone exposure, rearing by the family, and community attitudes. Unfortunately, much of the data in this area are anecdotal (reviewed in Refs. 130 and 131). These issues are discussed further in *Section V.D.*

In summary, most CAH children manifest normal neuropsychological development. Moreover, despite a tendency toward male gender role behavior and homoerotic fantasy, most girls with CAH identify as females and exhibit heterosexual preference.

### I. Tumors

1. *Adrenal.* Almost 60% of patients with incidentally discovered adrenal masses (incidentalomas) have exaggerated 17-OHP responses to ACTH stimulation; the frequency of abnormal responses is even higher in patients with bilateral adrenal masses (156). The frequency of germline mutations in *CYP21* in such patients is low (157). However, the incidence of adrenal masses appears to be higher in CAH patients and in heterozygotes than in the general population (158). Histological types of adrenal tumor include adenoma, myelolipoma (159, 160), and hemangioma (161). Steroid-responsive hyperplastic adrenal nodules can present in previously undiagnosed patients late in life and can potentially be confused with virilizing adrenal adenomas (159, 162, 163). Because these tumors may regress with glucocorticoid therapy, it may be unnecessary to resect them if they are carefully followed. Rarely, virilizing adrenal carcinoma has been found in CAH patients (164, 165), but most adrenal masses in children with CAH are benign (166).

Partially autonomous cortisol secretion is rare in adrenal adenomas arising in patients with hormonal evidence of 21-hydroxylase deficiency (167). Acute adrenal insufficiency may develop after resection of such a nodule if steroids secreted by the nodule have suppressed ACTH secretion, leading to atrophy of the remaining adrenal cortex (168).

2. *Testicular.* Although seen most often in inadequately treated patients, testicular adrenal rests accompanied by deficient spermatogenesis may occur despite treatment, particularly in males with the salt wasting form of 21-hydroxylase deficiency (104, 169, 170). These tumors, although most often benign, have prompted biopsies and sometimes even orchiectomy (171). The preferred mode of treatment consists of effective adrenal suppression with dexamethasone, since many of these tumors are ACTH responsive. When they do not respond to dexamethasone, testis-sparing surgery may be performed after imaging of the tumor by sonography and/or MRI (171). Adrenalectomy (*Section V.C.2*) would not be expected to alleviate problems caused by gonadal adrenal rests (172). Testicular masses have been detected in children as young as 3 yr with CAH (116, 173), prompting the recommendation that boys undergo a baseline testicular sonogram by adolescence (174). The testes of affected males should be carefully examined throughout childhood, adolescence, and adulthood.

The main differential in the diagnosis of a virilizing testicular mass is a Leydig cell tumor. Such tumors can occasionally secrete high levels of 17-OHP suggesting CAH, but the secretion of 17-OHP from such a tumor will not be suppressed by dexamethasone or stimulated by ACTH (175). In general, bilateral tumors or those that decrease in size with dexamethasone are very likely to be adrenal rests. An adrenal rest may also be diagnosed if selective spermatic vein catheterization to assay steroids produced by the testis reveals high levels of 11 $\beta$ -hydroxylated steroids (*e.g.*, 21-deoxycortisol) (176), because the 11 $\beta$ -hydroxylase enzyme is not active in testicular tissue.

3. *Pituitary.* Although glucocorticoid replacement doses exceed physiological cortisol production, CRH and ACTH of-

ten are not fully suppressed by treatment as evidenced by basal levels and by stimulation testing with ovine CRH. In one study, four of seven CAH patients undergoing MRI of the head showed pituitary abnormalities (three apparent microadenomata and one empty sella) (177). However, to the best of our knowledge symptomatic pituitary tumors have not been reported.

### J. Nonclassic CAH phenotypes

1. *Signs.* Patients with the mild, nonclassic form of 21-hydroxylase deficiency may have any of the signs of postnatal androgen excess listed above, but affected females are born with nonambiguous (normal or with mild clitoromegaly) external genitalia. Adrenal steroid precursors of 21-hydroxylase are only mildly elevated in nonclassic CAH and are intermediate between those of heterozygote carriers of the enzyme deficiency and those who are severely affected (35). Depending on the laboratory, affected individuals have serum 17-OHP levels of greater than 1,000 or 1,500 ng/dl 60 min after an intravenous bolus of cosyntropin (ACTH 1–24). Due to circadian variability of adrenal cortical hormones (178), the diagnosis may be missed by measuring only baseline serum 17-OHP late in the day. The severity of signs and symptoms of mild androgen excess varies widely, and probably many affected individuals are asymptomatic. The most common presenting symptoms are premature pubarche in children (179, 180), or severe cystic acne (181), hirsutism, and oligomenorrhea in young women (58, 182).

Nonclassic male patients diagnosed after puberty have presented with acne or infertility, but are most often diagnosed in the course of family studies and are entirely asymptomatic (183, 184). Rarely, a nonclassic male has presented with unilateral testicular enlargement (183). Precise clinical distinction between classic simple virilizing disease and the nonclassic disorder is often difficult among boys, since 17-OHP levels form a continuum between the mild and severe cases, and signs of androgen excess are much less apparent than in females.

Aldosterone synthesis and sodium balance are not compromised to any clinically significant extent in patients with nonclassic 21-hydroxylase deficiency (185), although under stress conditions subtle abnormalities may be elicited (186). Likewise, cortisol synthesis during stress is not impaired to any clinically significant degree (185), and there have been no deaths from adrenal insufficiency reported with this condition.

There are conflicting reports as to whether adult height is compromised in nonclassic CAH. Height SD scores were lower in one study compared with the population ( $-0.99 \pm 0.98$ ) but not when compared with midparent heights ( $0.43 \pm 0.77$ ) (94). Similarly, other investigators found no differences between nonclassic patients and their unaffected siblings (187).

The pathophysiology of the less frequent and milder reproductive problems associated with nonclassic CAH is presumably similar to that suggested for classic CAH. Data regarding reproductive function in nonclassic CAH come mainly from studies of populations referred for symptoms and signs of hyperandrogenism and/or infer-

tility; ascertainment bias obviously affects such studies. In one report 39% of women presented with hirsutism, 39% with oligomenorrhea or other signs of polycystic ovaries, and 22% with no obvious signs of androgen excess (188). Based on data derived from family studies, it is clear that many individuals with mild 21-hydroxylase deficiency have minimal symptoms and are not brought to medical attention. French investigators found that half of the patients in their clinic became pregnant before the diagnosis of nonclassic CAH was made. All the others who desired pregnancy successfully conceived during hydrocortisone treatment; only 1 of 20 women required clomiphene citrate to conceive (189). Clomiphene without hydrocortisone has also successfully induced ovulation (190). For women who have conceived without hydrocortisone treatment, it is not necessary to initiate therapy during pregnancy; testosterone levels in nonpregnant women with nonclassic CAH are generally lower than typical testosterone levels in normal women during the second trimester of pregnancy (*i.e.*, less than about 150 ng/dl).

2. *Incidence.* Because the signs of androgen excess in nonclassic 21-hydroxylase deficiency can be difficult to discern, particularly in males, the most reliable estimates of allele and disease frequencies come from ascertainment of affected individuals in the course of studies of kindreds in which classic and nonclassic 21-hydroxylase deficiency are segregating (191–193). The disease frequency is estimated at 0.1% of the general population but it occurs in 1–2% of Hispanics and Yugoslavs and 3–4% of Ashkenazi (Eastern European) Jews. Similar frequencies have been estimated from a small screening study using morning salivary 17-OHP levels (194). In New Zealand, molecular screening of normal newborns showed that 5% are carriers for mutations in the 21-hydroxylase gene (*CYP21*) associated with either classic or nonclassic 21-hydroxylase deficiency (see *Section VI.F*). This implies a disease frequency for nonclassic 21-hydroxylase deficiency of 0.06%, in good agreement with estimates in the general American population (195).

Although it has been suggested that nonclassic 21-hydroxylase deficiency represents the most frequent autosomal recessive genetic disorder in man (191, 194), the proportion of affected individuals who have problems with androgen excess is not known. To the best of our knowledge there has been no prospective study of symptomatology in any nonclassic 21-hydroxylase deficiency patient population. Because of the stigma and anxiety that may be associated with the diagnosis of a genetic disease, we suggest that nonclassic 21-hydroxylase deficiency be initially considered a “genetic polymorphism” and discussed as a disease only if signs of androgen excess develop.

Conversely, only a small percentage of individuals presenting with signs of androgen excess prove to be affected with nonclassic 21-hydroxylase deficiency. Among children referred for precocious pubarche, 4–7% have nonclassic 21-hydroxylase deficiency (180, 196–198). Among 31 women referred for acne, none had 21-hydroxylase deficiency, although a majority of patients had exaggerated adrenal responsiveness to ACTH stimulation (199). In

the largest study of hyperandrogenic women, only 6% of 400 hirsute French women had hormonal profiles compatible with the diagnosis of late-onset CAH (200). These statistics have been borne out in other large clinic population samples (201–203). The lowest incidence of nonclassic CAH was 1.2% in 83 hyperandrogenic Californian women (204), whereas the highest incidence of nearly 14% was detected in New York women (205). Variations in the frequency of nonclassic alleles among different ethnic groups may account for some of the discrepancies noted. New York has a high proportion of Ashkenazi Jews, and this group has the highest frequency of the typical nonclassic *CYP21* allele, valine-to-leucine 281 (V281L), associated with *HLA-B14,DR1* (see Section VI.E) (191, 206).

There does not appear to be a high prevalence of nonclassic CAH in men with infertility (207), and, conversely, most men with nonclassic CAH ascertained through family studies have proved fertile. However, oligospermia and infertility have occasionally been described (104, 183, 208). In some cases, these problems may be reversed by glucocorticoid treatment (104, 208).

The incidence of classic CAH is discussed in Section IV.B.

### K. Heterozygotes

Heterozygotes carrying a single mutant allele have slightly elevated 17-OHP levels after ACTH stimulation, but there is substantial overlap with unaffected individuals (35). The range of most heterozygotes' 17-OHP response at 60 min after cosyntropin stimulation is approximately 200–1,000 ng/dl (209). Of 53 women with signs of hyperandrogenism who were suspected by hormonal testing of being carriers for *CYP21* mutations, such mutations could be detected in only 37; in contrast, mutations could be detected on both alleles in 15/16 women who had 17-OHP or 21-deoxycortisol levels in the range expected for nonclassic CAH (210).

In view of these problems with hormonal detection of heterozygotes, genotyping would appear to be a superior heterozygote detection method. This is discussed further in Sections IV.B and VI.H.

Mothers of children with classic CAH are no more likely to show signs of androgen excess than age, sex, and BMI-matched controls (211). However, children referred to an endocrine clinic for premature pubarche or hirsutism showed a higher prevalence of heterozygous *CYP21* mutations compared with 80 adult controls who were not screened for hyperandrogenic signs or symptoms (212). Since potential heterozygotes in the latter study were culled from a symptomatic referral population, they may not represent the population-at-large carrying *CYP21* mutations. With estimated nonclassic and classic heterozygote frequencies of 10% (191) and 1.5% in the general population, respectively, it is unlikely that heterozygosity confers a clinically significant reproductive disadvantage. Screening of men referred for evaluation of infertility has not revealed a high prevalence of nonclassic 21-hydroxylase deficiency patients or heterozygotes (207).

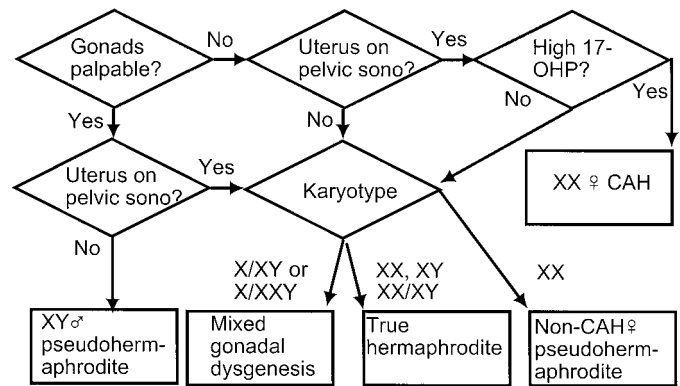

FIG. 5. Simplified flowchart for initial evaluation of ambiguous genitalia. Decision points are denoted by diamonds, and endpoints by rectangles. Note that a karyotype is almost invariably performed, although palpation of gonads and a pelvic sonogram permit a tentative sex assignment in many cases.

## IV. Diagnosis of 21-Hydroxylase Deficiency

### A. Evaluation of ambiguous genitalia

Management of the child born with ambiguous genitalia presents a difficult challenge to medical personnel. Insensitive and poorly informed statements made in the delivery room or subsequently may cause long-term psychological problems for the families of such children. It is therefore important to refrain from assigning the sex until diagnostic information can be gathered. Usually test results can be obtained within 24–48 h and parents can be advised as to the child's chromosomal and gonadal sex and on the anatomy of internal sexual structures.

A detailed review of the evaluation of ambiguous genitalia is beyond the scope of this paper (see Refs. 213 and 214), but some general principles may be stated (Fig. 5). The physical examination should identify the urethral meatus and should include careful palpation for gonads in the inguinal canals and labia or scrotum. Standard diagnostic tests should include at least a measurement of basal serum 17-OHP, but preferably a complete profile of adrenocortical hormones before and 1 h after cosyntropin stimulation. These assays should be deferred past the first 24 h of life (also see Section IV.C.1). They will identify potential defects in adrenal steroidogenesis; salt wasting 21-hydroxylase deficiency is the most commonly encountered cause of female pseudohermaphroditism. After testing is completed, the child's vital signs should be monitored for any indication of adrenal crisis. It is rare for salt wasting crisis to occur before 7 days of life, but many clinicians will obtain electrolyte measurements to assess hyponatremia and hyperkalemia in CAH newborns during the first week. PRA and aldosterone are elevated in many normal infants and do not usually add much useful information within the first days of life.

Additional tests that aid in understanding the etiology of ambiguous genitalia include a rapid karyotype and a pelvic and abdominal sonogram. Further testing will be dictated by the outcome of these initial tests. For instance, a radiological dye study may be done in 46 XX infants to examine the internal genitourinary anatomy, or in 46 XY infants, hCG stimulation may help define androgen synthetic defects such

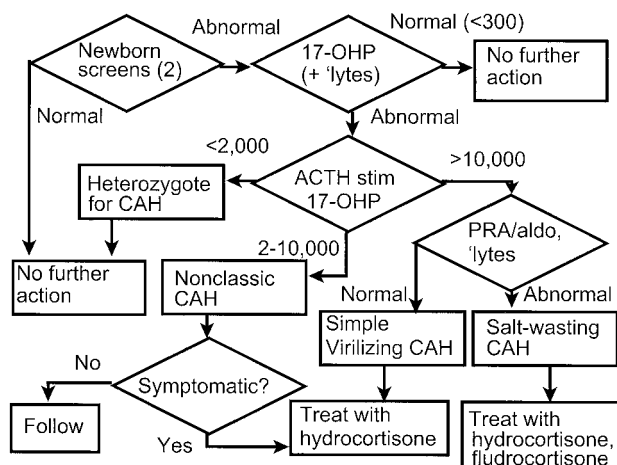

FIG. 6. Flowchart for decisions pertaining to newborn screening for 21-hydroxylase deficiency. ACTH stim 17-OHP, 17-Hydroxyprogesterone level after cosyntropin stimulation; 'lytes, electrolytes.

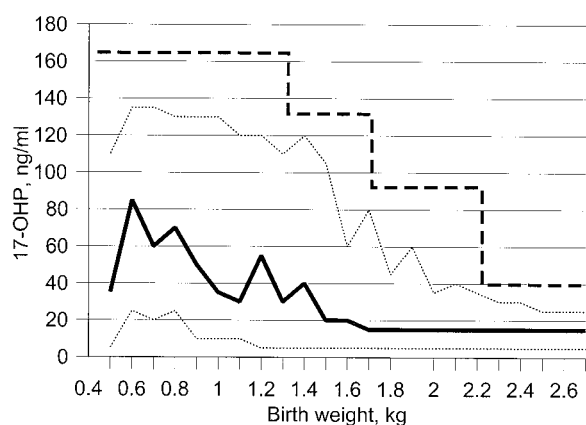

FIG. 7. Levels of 17-OHP in dried blood samples from the Wisconsin neonatal screening program, plotted against birth weight. The heavy line represents mean values and the dotted lines represent 95% confidence limits. The heavy dashed line denotes threshold notification values in the Wisconsin program for infants of various birth weights. [Adapted from Ref. 217].

as  $5\alpha$ -reductase deficiency. A team consisting of neonatologist, pediatric endocrinologist, urologist, and preferably an experienced social worker and/or child psychiatrist should promptly review the essential early diagnostic data and make a recommendation to the family as to the sex of rearing and any medical and/or surgical treatments. These recommendations should be based on both the current state of knowledge of psychosexual development in intersex individuals (discussed in Section III.H) and the feasibility of surgical correction (Section V.D). Although all available options should be reviewed with the family, these recommendations should be as unequivocal as possible.

### B. Newborn screening

CAH is a disease well suited to newborn screening since it is a common and potentially fatal childhood disease, it is easily diagnosed by a simple hormonal measurement in

blood, and early recognition and treatment can, in principle, prevent serious morbidity and mortality (Fig. 6).

1. *Technical considerations.* The diagnosis of CAH is suspected when one finds a markedly elevated filter paper blood 17-OHP level by RIA (215, 216); normative values for filter paper assays vary in different laboratories. These assays use the same "Guthrie" cards as are used for screening for phenylketonuria and hypothyroidism. Subsequent measurement of serum 17-OHP is usually performed to confirm the diagnosis.

Premature, sick, or stressed infants tend to have higher levels of 17-OHP than term infants and generate many false positives unless higher normal cut-offs are used (Fig. 7). Suggested weight-adjusted cut-offs range from 165 ng/ml for infants under 1,300 g to 40 ng/ml for infants over 2,200 g in Wisconsin (217); in Texas, cut-offs of 40 and 65 ng/ml are used for infants greater or less than 2,500 g, respectively (218). Elevated 17-OHP levels in preterm infants have been confirmed by HPLC and are thus not due to cross-reaction with other steroids [however, some 17-OHP RIAs do cross-react with other steroids; these include  $15\beta$ -hydroxylated compounds, which are apparently generated by gut bacteria and resorbed through the enterohepatic circulation (219)]. The steroid profiles in preterm infants suggest a functional deficiency of several adrenal steroidogenic enzymes with a nadir in function at 29 weeks of gestation (220).

2. *Incidence and cost effectiveness.* As determined by screening (Table 3, and summarized in Ref. 81) the highest incidence of classic CAH occurs in two geographically isolated populations, the Yupik Eskimos of Western Alaska (1:280) (221) and the French island of La Reunion in the Indian Ocean (1:2,100). The incidence in most other populations ranges from approximately 1:10,000 to 1:18,000 (81, 195, 217, 218, 222-224).

It is now well established that screening markedly reduces the time to diagnosis of infants with CAH (218, 224-226). The main putative benefit of this is reduced morbidity and mortality because infants with salt wasting disease are diagnosed more promptly. As undiagnosed infants who die suddenly may not be ascertained, it is difficult to demonstrate a benefit of screening by direct comparison of death rates from CAH in unscreened and screened populations. However, males

TABLE 3. Frequency of classic 21-hydroxylase deficiency determined from neonatal screening (representative populations)

| Region                   | Incidence | No. detected/<br>no. screened | Reference <sup>a</sup> |
|--------------------------|-----------|-------------------------------|------------------------|
| Alaska, Yupik Eskimos    | 1:280     | 5/1,131                       | (221)                  |
| France, La Reunion       | 1:2,100   | 7/14,987                      | (81)                   |
| Sweden                   | 1:9,800   | 73/not given                  | (225)                  |
| United States, Wisconsin | 1:11,000  | 14/149,684                    | (217)                  |
| France, Lille            | 1:13,000  | 31/408,138                    | (539)                  |
| Japan                    | 1:18,000  | Not given/4,500,000           | (232)                  |
| United States, Texas     | 1:16,000  | 121/1,936,998                 | (218)                  |
| Scotland                 | 1:17,000  | 7/119,960                     | (81)                   |
| Italy                    | 1:18,000  | 27/420,960                    | (224)                  |
| New Zealand              | 1:23,000  | 23/536,915                    | (223)                  |

<sup>a</sup> References to earlier studies are found in Ref. 81.

with salt wasting CAH are more likely than females to suffer from delayed or incorrect diagnosis because there is no genital ambiguity to alert the clinician. Thus, a relative paucity of salt wasting males in a patient population may be taken as indirect evidence of unreported deaths from salt wasting crises. Indeed, females outnumbered males in some (227, 228) but not all (229) retrospective studies in which CAH was diagnosed clinically. In contrast, cases of salt wasting CAH ascertained through screening programs are equally or more likely to be males rather than females (224–226).

As regards morbidity, infants ascertained through screening have less severe hyponatremia (225) and tend to be hospitalized for shorter periods of time (although the difference falls short of statistical significance) (226).

Although salt wasting males would seem to derive the greatest benefit from screening programs, the delay before correct sex assignment of severely virilized females is also markedly reduced (79, 81, 225). Moreover, males with simple virilizing disease may otherwise not be diagnosed until rapid growth and accelerated skeletal maturation are detected later in childhood, at which time final height may already be adversely affected. However, it is debatable whether this last benefit itself justifies the costs of a screening program.

The estimated cost of screening each newborn infant was \$2.70 in Sweden. With a disease incidence of 1:9,800 in this population, 102 affected newborns are expected per million infants screened; 51 should be males, of whom 75% should be salt wasters. The total cost for screening each million infants is \$2,700,000, and thus the cost for each of 38 salt wasting males expected to be detected by screening is \$71,000. The cost of newborn CAH screening in Texas was higher at \$87,000 per CAH case, as separate hormonal assays were performed on each infant at birth and again at 1–2 weeks of age (218). All infants with salt-wasting CAH were detected on the first screen, so that the second screen may not be cost effective (230).

Nevertheless, these costs are within the general range estimated for other newborn infant disease detection programs. By comparison, targeted newborn screening for hemoglobinopathy in Alaska cost approximately \$200,000 per death averted (231).

Patients with nonclassic 21-hydroxylase deficiency are occasionally detected by newborn screening. In Texas, 87% are detected on the second of the two routine screening tests, with an overall frequency of nonclassic disease of 1:35,870 (218). This is much less than the 1:1,000 frequency in the general population estimated from nonclassic allele frequencies in kindreds in which classic 21-hydroxylase deficiency is segregating (191, 192). Thus, neonatal screening using hormonal assays is not an efficient way to detect nonclassic disease. As yet, there are no follow-up studies of patients with nonclassic disease who have been ascertained by neonatal screening to determine how frequently they develop signs of androgen excess. There have also not been any systematic genotyping studies of nonclassic patients ascertained through neonatal screening to determine whether their genotypes differ from nonclassic patients ascertained through family studies or because they had developed signs of androgen excess. In a small study in Japan, all four patients ascertained through neonatal screening were compound het-

erozygotes for classic mutations (232), consistent with the higher 17-OHP levels seen after cosyntropin stimulation in compound heterozygotes (36)(also see *Section VI.I*). These data suggest that infants who are homozygous for mild *CYP21* mutations are less likely to be detected by basal hormone screening.

*3. Strategies for follow-up.* To obtain adequate sensitivity, the cut-off levels for 17-OHP are typically set low enough that 0.3–0.5% of all tests are reported as positive. Therefore, specificity is only 2%, *i.e.*, 98% of all positive tests are false. The above estimates for cost of detection do not include costs for follow-up of false positives. In Texas (218), both the infant's primary physician and a pediatric endocrinologist are notified of all positive screens. Moderately elevated 17-OHP levels (40–100 ng/ml for term infants) are followed up with a repeat filter paper specimen. Higher values are evaluated with electrolytes and a serum 17-OHP level; if these are not unequivocally normal, the infant is then referred to a pediatric endocrinologist. A cosyntropin stimulation test is then usually performed.

*4. Molecular genetic screening.* Much of the expense of following up positive newborn screening tests could be avoided with a second level of screening based on detection of actual mutations (see *Section VI.H*). This could be accomplished on DNA extracted from the same dried blood spots as are used for hormonal screening. Because 90–95% of mutant alleles carry one or more of a discrete number of mutations (see *Section VI.F*), samples that carry none of these mutations may be presumed with more than 99% confidence to be unaffected. Heterozygous carriers of a mutation for classic 21-hydroxylase deficiency would still need to be followed up due to the chance that the other allele might carry a novel mutation, but less than 2% of individuals are carriers of classic 21-hydroxylase deficiency alleles.

Two large-scale studies of the utility of genotyping in screening programs have shown that this is a useful adjunct to hormonal measurements (195, 233). One study examined cost and found it to be approximately \$5 per sample analyzed (195). At present, however, there are few laboratories equipped to do rapid, accurate, and large-scale *CYP21* genotyping.

### C. Further biochemical evaluation

*1. The cosyntropin stimulation test.* As previously mentioned, a basal serum or filter paper 17-OHP may not be fully informative, and it may be necessary to evaluate the patient further. In cases where there is no newborn screening program, but one suspects CAH based on ambiguous genitalia, cosyntropin stimulation should be deferred beyond the first 24 h of life. There is a high incidence of both false-positive and false-negative results when samples are obtained immediately after birth. Another justification for performing stimulation testing is that 17-OHP may be elevated in other enzymatic defects, *e.g.*, 11 $\beta$ -hydroxylase or 3 $\beta$ -hydroxysteroid dehydrogenase deficiencies. Ideally, to fully differentiate the various enzymatic defects, the clinician should measure 17-OHP, cortisol, DOC, 11-deoxycortisol, 17-OH-pregnenolone, DHEA, and androstenedione at 0 min and 60 min (Fig. 8). If blood volume is an issue in small

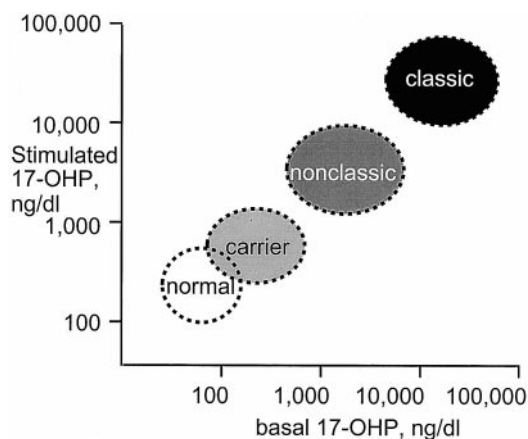

FIG. 8. Nomogram for comparing 17-OHP levels before and 60 min after a 0.25 mg iv bolus of cosyntropin in subjects with or without 21-hydroxylase deficiency. Note that the values for normals and heterozygotes (carriers) overlap. [Adapted from Ref. 35.]

infants, a sample is collected only at 60 min. Precursor to product ratios are particularly useful in distinguishing the different enzymatic defects. If the diagnosis remains unclear, it may be desirable to treat the child and later retest after partially or completely tapering glucocorticoids. Our practice is to use a uniform dose of 0.25 mg cosyntropin, providing a pharmacological stimulus to the adrenal cortex. This diagnostic test should be distinguished from the low-dose ACTH stimulation test now becoming increasingly popular for evaluating the integrity of the hypothalamic-pituitary-adrenal axis (234, 235).

**2. Evaluation of salt wasting.** Elevated PRA values, and particularly the ratio of PRA to 24 h urinary aldosterone, are often used as markers of impaired aldosterone synthesis (236). They can also be increased in patients with normal aldosterone secretion who have high circulating levels of ACTH, 17-OHP, and progesterone, making poorly controlled simple virilizers biochemically resemble salt wasters. Conversely, mineralocorticoid therapy may aid adrenal suppression in such patients (236). Ideally, plasma and urinary aldosterone levels should be correlated with PRA and with sodium balance to gain an accurate assessment of phenotype. A direct immunoradiometric assay of active renin may be an alternative to PRA measurements, with the advantage of smaller sample requirements, but it is not yet widely available (237). In interpreting renin levels, it should be kept in mind that they are normally higher in neonates than in older children, and age-specific reference values for both immunoreactive renin (238) and for PRA (239) in infants and children vary by laboratory.

**3. Other hormones useful in diagnosis and monitoring of CAH.** Several other diagnostic biochemical assays have been proposed, but few are widely available. Assays of 21-deoxycortisol can detect more than 90% of CAH heterozygotes (39, 40). Levels of an androgen metabolite,  $3\alpha$ -androstenediol glucuronide, are elevated in nonclassic 21-hydroxylase deficiency (240) and highly correlated with levels of androstenedione and testosterone (241). The main urinary metabolite of 17-OHP, pregnanetriol, can also be used to diagnose 21-hydroxylase deficiency. Moreover, urinary levels of pregnanetriol glucuronide may be

a way to monitor therapeutic efficacy and possible overtreatment (242). As an alternative to enzyme-linked immunoassays or RIAs, urinary steroid metabolites can be analyzed by GS/MS, in which case several relevant markers for CAH and other disorders of steroid metabolism can be assayed simultaneously (243).

## V. Treatment

### A. Glucocorticoid replacement

**1. Overview.** All patients with classic 21-hydroxylase deficiency, and symptomatic patients with nonclassic disease, are treated with glucocorticoids. This suppresses the excessive secretion of CRH and ACTH by the hypothalamus and pituitary and reduces the abnormal blood levels of adrenal sex steroids. In children, the preferred cortisol replacement is hydrocortisone (*i.e.*, cortisol itself) in doses of 10 to 20 mg/M<sup>2</sup>/day in two or three divided doses. These doses exceed physiological levels of cortisol secretion, which are 6–7 mg/M<sup>2</sup>/day in children and adolescents (244, 245). Although cortisol secretion is normally only slightly higher in neonates—7–9 mg/M<sup>2</sup>/d (246)—infants with CAH are usually given a minimum of 6 mg/day in three divided doses. The supraphysiological doses given to children with CAH seem to be required to adequately suppress adrenal androgens and to minimize the possibility of developing adrenal insufficiency.

The short half-life of hydrocortisone minimizes growth suppression and other adverse side effects of longer acting, more potent glucocorticoids such as prednisone and dexamethasone. On the other hand, a single daily dose of a short-acting glucocorticoid is ineffective in controlling adrenocortical hormone secretion (247).

Cortisone acetate is not a drug of first choice for CAH. It has only 80% of the bioavailability of hydrocortisone and approximately two thirds of its potency (248). Moreover, since cortisone must be converted to cortisol to be biologically active, defective  $11\beta$ -hydroxysteroid dehydrogenase reductase activity can further reduce the efficacy of this drug (249).

Older adolescents and adults may be treated with modest doses of prednisone (*e.g.*, 5–7.5 mg daily in two divided doses) or dexamethasone (total 0.25–0.5 mg given as one or two daily doses). Patients should be monitored carefully for signs of iatrogenic Cushing's syndrome such as rapid weight gain, hypertension, pigmented striae, and osteopenia. Men with testicular adrenal rests may require higher dexamethasone doses to suppress ACTH.

Treatment efficacy (*i.e.*, suppression of adrenal hormones) is assessed by monitoring 17-OHP and androstenedione levels. Testosterone can also a useful parameter in females and prepubertal males. Because of the adverse effects of overtreatment (see the next section) it is not desirable to completely suppress endogenous adrenal corticosteroid secretion. A target 17-OHP range might be 100–1000 ng/dl with commensurate age and gender-appropriate androgen levels (247, 250). Hormones should be measured at a consistent time in relation to medication dosing, preferably at 0800 h at the physiological peak of ACTH secretion, or at least at the nadir of hydrocortisone blood levels just before the next dose

is to be given. Remote monitoring of hormonal control in CAH patients is possible through the use of either salivary hormone measurements (194, 251, 252) or finger-prick blood samples collected on filter paper and assayed for 17-OHP (247, 250, 253). The latter methodology is routinely used for neonatal screening for CAH (see *Section IV.B*).

Children should have an annual bone age x-ray and careful monitoring of linear growth. Despite careful monitoring and good patient compliance, most retrospective reviews (94–99) indicate that final height averages 1–2 sds below the population mean or the target height based on parental heights.

*2. Adverse effects of overtreatment.* Early excessive glucocorticoid treatment (hydrocortisone dose  $> 20 \text{ mg/m}^2/\text{day}$ ) is potentially detrimental to growth (67). A randomized prospective crossover trial showed that patients treated with  $15 \text{ mg/m}^2/\text{day}$  of hydrocortisone were less likely to show growth suppression compared with those taking doses of  $25 \text{ mg/m}^2/\text{day}$  (254). High body mass index in childhood also correlates with poor final height and may be a surrogate marker for overtreatment (67, 255). However, patients with CAH may be more prone to obesity than other children, and they begin gaining weight earlier in childhood (nadir for adiposity of 1.7 yr in British children with CAH as compared with 5.5 yr in the general UK population) even when height is normal (256). Despite linear growth averaging approximately 1 sd below the mean, bone mineral density does not appear to be compromised in CAH patients receiving typical glucocorticoid doses (98, 257–259). Only one study of Finnish patients showed low bone density in the femoral and L2–4 lumbar regions; the authors attributed their findings to excessive glucocorticoid dosing in some subjects (260). However, decreased bone turnover has also been associated with CAH (261).

If control cannot be achieved with hydrocortisone, it is reasonable to use either prednisone or dexamethasone for a 2- to 4-day course of suppressive therapy before resuming hydrocortisone. After epiphyseal fusion, prednisone or dexamethasone may be used as maintenance therapy, but doses should not exceed the equivalent of  $20 \text{ mg/m}^2$  hydrocortisone daily, and patients should be carefully monitored for signs of iatrogenic Cushing's syndrome.

*3. Stress dosing.* Patients with classic CAH cannot mount a sufficient cortisol response to stress and require pharmacological doses of hydrocortisone in such situations as febrile illness and surgery under general anesthesia. Such treatment should approximate typical endogenous adrenal secretion in critically ill and perioperative patients (71). Dose guidelines include tripling the maintenance dose of oral hydrocortisone (administered in three divided doses) in minor febrile illnesses. If a patient is unable to tolerate oral medication, intramuscular hydrocortisone sodium succinate (Solu-Cortef) may be given, but medical advice concerning the need for intravenous hydration should be promptly sought. Patients and parents should receive instructions for these types of emergency contingencies, and patients should carry or wear identification with information about their medical condition. For major surgery, administration of hydrocorti-

one ( $100 \text{ mg/m}^2/\text{day}$ ) divided in four intravenous doses is warranted for at least 24 h peri- and postoperatively before tapering over several days to a maintenance dose. Intravenous hydrocortisone is preferred over equivalent glucocorticoid doses of methylprednisolone (Solu-Medrol) or dexamethasone because (when it is administered in high doses) its mineralocorticoid activity is able to substitute for oral fludrocortisone.

Patients with nonclassic CAH do not require stress doses of hydrocortisone for surgery unless they have iatrogenically been rendered hypoadrenal by prior chronic administration of glucocorticoids. In our experience no patient with nonclassic CAH has ever shown evidence of adrenal insufficiency. However, one assumes that all patients treated over long periods of time with glucocorticoids have some degree of endogenous adrenal suppression. It is therefore prudent to treat with supplemental glucocorticoids in times of extreme stress, and patients receiving such therapy should wear medical alert tags. Alternatively, if given adequate advance notice, one could discontinue treatment and test the integrity of the hypothalamic-pituitary-adrenal axis with a low-dose ACTH stimulation test (234, 235).

*4. Indications for therapy in patients with nonclassic CAH.* Individuals diagnosed with nonclassic CAH should be offered treatment when they manifest signs or symptoms of androgen excess. Low-dose glucocorticoid therapy may be initiated in children with precocious pubarche, *i.e.*, inappropriately early onset of body hair and odor, accompanied by advanced bone age. A small group of Jewish nonclassic CAH patients was able to achieve final heights within the range predicted from parental heights as long as glucocorticoid therapy was started at the first signs of precocious adrenarche or bone age acceleration; delaying initiation of therapy until after central puberty began was associated with decreased final height (262). Other studies have found no adverse effect of nonclassic CAH on height (187).

Other common indications for treatment are hirsutism, oligomenorrhea, and acne in young women. Infertility patients diagnosed with nonclassic CAH should also be treated, as they may more readily become pregnant if the hormonal imbalance is the principal obstacle to conception. Treatment with glucocorticoids suppresses adrenal androgen production, resulting in gradual improvement in clinical signs of androgen excess. Remission of hirsutism is the most difficult objective to achieve with glucocorticoid monotherapy, as established hair follicles are difficult to eradicate. Cosmetic therapy is therefore advised as an adjunct to hormonal therapy in women for whom the hirsutism is unsightly. An exact timetable to regression of each clinical sign has yet to be established.

Men with nonclassic CAH may achieve improved sperm counts and fertility with glucocorticoid treatment (263, 264). Although rare, testicular enlargement in nonclassic males is also an indication for glucocorticoid therapy (183).

Nonclassic patients whose symptoms have resolved (*e.g.*, a boy treated for precocious pubarche, now fully grown), or affected women past child-bearing age, should be given the option of discontinuing therapy.



### B. Mineralocorticoid replacement

Infants with the salt wasting form of 21-hydroxylase deficiency require mineralocorticoid (fludrocortisone, usually 0.1–0.2 mg but occasionally up to 0.4 mg daily) and sodium chloride supplements (1 to 2 g daily; each gram of sodium chloride contains 17 mEq of sodium) in addition to glucocorticoid treatment. The sodium content of either breast milk or the most popular infant formulae is about 8 mEq/liter, which is only sufficient for maintenance sodium requirements in healthy infants. Considerably more sodium (~8 mEq/kg/day) must be supplied to keep up with ongoing losses in aldosterone-deficient infants. Often, older children acquire a taste for salty food and do not require daily supplements of sodium chloride tablets. Moreover, fludrocortisone doses may often be decreased after early infancy.

Although patients with the simple virilizing form of the disease by definition secrete adequate amounts of aldosterone, they are nevertheless often treated with fludrocortisone. This can aid in adrenocortical suppression, reducing the dose of glucocorticoid required to maintain acceptable 17-OHP levels (236).

PRA may be used to monitor mineralocorticoid and sodium replacement. Hypertension, tachycardia, and suppressed PRA are clinical signs of overtreatment with mineralocorticoids (265). Excessive increases in fludrocortisone dosage may also retard growth (266).

### C. Other therapeutic approaches

1. *Pharmacological.* A novel four-drug regimen for CAH, consisting of flutamide (an androgen receptor-blocking drug), testolactone (an aromatase inhibitor), low-dose hydrocortisone, and fludrocortisone, showed promising results after a 6-month trial. Children in the experimental treatment group showed less bone age advancement and more appropriate linear growth velocity than those in the standard treatment group (267). After 2 yr, the 16 children in the experimental group showed higher levels of 17-OHP, androstenedione, DHEA and its sulfate, and testosterone, plus a slower rate of growth and bone maturation with improved predicted height compared with children on standard therapy. However, central precocious puberty occurred and required treatment with LHRH analog in 3 of 8 males in the experimental therapy group and in 0 of 9 control males (268). It remains to be seen whether longer term, larger scale studies will show a favorable effect of the experimental regimen on final height. Other questions include whether the average family could cope with such a medical regimen in a school-aged child, and what the cost of such therapy would be over many years.

Another interesting experimental CAH therapy is the addition of carbenoxolone, an inhibitor of 11 $\beta$ -hydroxysteroid dehydrogenase (11-HSD). The latter is an enzyme important in inactivating cortisol and preventing its access to the mineralocorticoid receptor (269). The rationale for carbenoxolone as an adjunct to therapy of CAH is that inhibition of the oxidative 11-HSD reaction should generate higher endogenous bioactive cortisol levels without administering larger doses of steroids. In a short-term pilot study with an open-label, crossover design involving six CAH patients aged 15

to 39 yr, there were significant reductions in 17-OHP, androstenedione, renin, and urinary pregnanetriol when carbenoxolone was added to the standard therapeutic regimen (270, 271). Hypertension is potentially a complication of such a regimen (269).

Two adult patients with CAH and concurrent malignancies were treated with chlormadinone acetate, an antiandrogen used overseas for prostate cancer. In both cases, secretion of ACTH and adrenal androgens was suppressed (272). At present, antiandrogens are not recommended for treatment of children and young women with CAH outside the research setting, since the risks of adverse side effects, including hepatic toxicity and teratogenicity, are significant.

2. *Adrenalectomy.* Consequences of inadequate treatment or noncompliance for the female include ongoing virilization in addition to compromise of linear growth. For this reason, it has been suggested that (laparoscopic) adrenalectomy may represent an alternative to suppressive medical therapy with glucocorticoids (273). Severely affected patients, especially females, could perhaps be more easily managed as Addisonians with low-dose gluco- and mineralocorticoids than with adrenal glands that secrete excessive sex steroids. Opponents of surgical treatment feel that this is too radical a step, potentially placing patients at risk from the surgical procedure, and later incurring further risks from iatrogenic adrenal insufficiency. Moreover, the beneficial effects of adrenalectomy may be confounded by the development of gonadal adrenal rests that can secrete androgen precursors (172). Finally, there is a clear benefit in terms of improved lipid profile, libido, and quality of life from physiological adrenal DHEA production (274, 275) that would be lost with adrenalectomy. Although patients have been managed in this manner (172, 276), further data must be collected before deciding whether adrenalectomy is a viable therapeutic alternative. It is likely to be used, if at all, in patients with severe 21-hydroxylase deficiency refractory to standard medical management.

3. *Gene therapy.* Because 21-hydroxylase deficiency is an inherited metabolic defect, the question arises of the feasibility of gene therapy (277). Indeed, mice with 21-hydroxylase deficiency have been rescued by transgenesis with a murine *Cyp21* gene (278). However, this disorder does not seem a promising test system for human gene therapy. As discussed above, medical therapy, albeit not perfect, is effective and relatively inexpensive. High level expression would need to be targeted to the adrenal cortex, where adequate levels of steroid precursors are available. As the most difficult therapeutic goal to achieve is adequate suppression of adrenal androgens, expression would need to be sufficiently high to permit nearly normal levels of cortisol biosynthesis under both normal and stress conditions, and such levels of expression would need to be maintained indefinitely to be cost effective in comparison with conventional treatment. These criteria seem unlikely to be met for the foreseeable future.

### D. Corrective surgery

The general approach to evaluating the newborn with ambiguous genitalia has been discussed in *Section IV.A*. In

general, the recommended sex assignment should be that of the genetic/gonadal sex, if for no other reason than to retain the possibility of reproductive function. This is especially true for females with 21-hydroxylase deficiency who have normal internal genital structures and potential for child-bearing. An exception to this rule might be the genetically female patient with completely male appearing genitalia, especially if the child has been raised as a male for more than a few months. Such children will need to be castrated at puberty to avoid feminization.

Whether, how, and when to intervene surgically in the correction of genital anomalies is the subject of continuing debate (279, 280). Some adult patients with CAH and other intersex conditions who are unhappy with their gender assignment, as well as some physicians, have advocated postponing genital surgery until the affected individual is able to provide informed consent for cosmetic genital surgery, and select the gender with which he/she will be most comfortable (279, 281–283). It is not clear, however, whether families would readily accept the idea of raising a child with indeterminate gender and/or ambiguous genitalia, whether children would then be psychologically traumatized due to lack of societal acceptance of such conditions, and whether such children would be able to develop an unambiguous gender identity at all.

It must also be recognized that recommendations for sex assignment are to some extent culture specific. In cultures that value infant boys over girls, parents may strongly resist rearing a female with ambiguous genitalia as a girl, and many girls with severely virilized external genitalia will be raised as males (152, 153).

The most common current approach to surgical correction is for clitoroplasty (284, 285), rather than clitoridectomy, to be done in infancy. In adolescence the patient can be taught to perform vaginal dilation with acrylic molds (286, 287). Vaginal reconstruction is often postponed until the age of expected sexual activity (288, 289), but single-stage corrective surgery has also been successfully performed in children (284, 290, 291). Correction in infancy may be more successful for cases of simple labial fusion than in cases where the distal vagina must be reconstructed (289, 292). Newer modifications in vaginoplasty procedures may improve outcome in patients with urogenital sinus for whom simple dilation is not helpful (286, 293, 294). According to self-assessment surveys among sexually active women with CAH, approximately 60% are able to have satisfactory intercourse (295). Reoperation is frequently required to achieve satisfactory results (292).

As surgical and medical treatment regimens have improved in recent years, more women with CAH have successfully conceived spontaneously, completed pregnancies, and given birth (296). Most often delivery is by cesarean section due to an inadequate introitus, but vaginal delivery is possible in some cases (109).

#### E. Psychological counseling

Families of CAH patients should be assessed for emotional health. The initial screening will most likely be done by the pediatrician and pediatric endocrinologist. The child behav-

ior checklist and the self-perception profile can be used in school-aged children (140). Parents should be offered psychological counseling soon after the diagnosis is made. Intermittent assessment of family functioning, as has been done in other disease states, may be a useful tool in predicting future problems (297). Children should, as they mature, be repeatedly informed about their condition by parents and physicians in a sensitive and age-appropriate manner. When psychotherapy is undertaken, medical and psychiatric caregivers should maintain communication so that both are aware of the patient's and family's status. Unfortunately, many locales lack mental health professionals with experience in counseling patients and families with intersex conditions.

Although psychosexual development of females with classic CAH is incompletely understood (*Section III.H*), we believe anticipatory counseling of patients' families should initially address the high likelihood that affected girls will exhibit tomboyish behavior, masculine play preferences and perhaps, when older, a preference for a career over domestic activities (133). In the contemporary United States, these preferences usually have a high degree of social acceptance, considering the increased availability of and interest in girls' competitive sports as well as the many women who work. Parents should also be reassured that the majority of (but not all) girls function heterosexually, although they may require repeated genital surgeries to have satisfactory intercourse. The endocrinologist and/or mental health professional (depending on inclination and experience) caring for the adolescent girl with CAH should address sexual orientation, both fantasized and actual. The patient should be reassured that some degree of attraction to other girls, although it does not always occur, is a typical feature of her condition. A discussion of psychotherapy for homosexuality is beyond the scope of this review, but it should be accepted by health care professionals that a minority of women with CAH may be most comfortable as homosexuals and that such individuals should be helped to come to terms with their situation. Adult patients should also be made aware of relevant patient advocacy groups.

#### F. Treatment of precocious puberty

Central precocious puberty may occur in the setting of excess adrenal sex steroids and advanced bone age, especially when glucocorticoid treatment is initiated in children with markedly advanced bone age. Under such circumstances, chronic exposure to adrenal androgens may cause the hypothalamic-pituitary gonadal axis to mature. A sudden decrease in androgen levels with adequate treatment may then trigger secretion of gonadotropins by the pituitary.

Clinical suspicion of central precocious puberty in affected boys may be aroused when physical examination in boys reveals increased testicular growth, or when girls show increased breast growth. In boys, serum testosterone may increase in the face of well controlled 17-OHP. However, since testosterone is also a byproduct of excessive adrenal sex hormone production, this hormone alone is not an accurate marker for central precocious puberty. An elevated ratio of testosterone to androstenedione suggests a gonadal, rather

than an adrenal, source of hormone production. Serum estrogen levels are not typically part of the hormonal profile for CAH management.

Definitive diagnosis of precocious puberty requires GnRH stimulation testing. LH and FSH levels drawn before and 30 min after a 100- $\mu$ g bolus of GnRH (Factrel) will show a marked rise in LH > FSH; the absolute levels depend on the type of assay employed.

Although spontaneous resolution of central precocious puberty has been anecdotally reported (298), this condition usually requires separate pituitary suppressive treatment with GnRH analogs (299). The goals of GnRH analog treatment are to suppress pituitary gonadotropins and, consequently, gonadal sex steroid production and to attempt to enhance adult height by preventing premature epiphyseal fusion. Whereas the first goal is readily achieved, the latter objective is more difficult. Preliminary data consisting solely of predicted height in but a few children allows cautious optimism about such treatment, but more long-term data are needed (300). Another goal of therapy is to avoid the adverse psychological consequences of premature puberty; anecdotal experience suggests this is aided by suppressive medical therapy.

GH-deficient children with precocious puberty who do not have CAH appear to benefit from combined treatment with GH and GnRH agonists if such treatment is begun at a relatively young bone age (301). However, short but otherwise healthy children with normally timed puberty do not benefit in terms of final height outcome from GnRH agonist plus GH therapy (302). CAH children are typically not GH deficient. Thus, multidrug regimens such as these remain experimental and very costly, and their effectiveness has not been established in CAH.

### G. Prenatal therapy

**1. Overview.** In pregnancies at risk for a child affected with virilizing adrenal hyperplasia, suppression of fetal adrenal androgen production and decreased genital ambiguity in females have been achieved by administering dexamethasone to the mother (303–311). As compared with hydrocortisone, dexamethasone has no salt retaining activity and it is able to cross the placenta because it is not metabolized significantly by placental 11 $\beta$ -hydroxysteroid dehydrogenase (269). The dose is typically 20  $\mu$ g/kg/day based on prepregnancy weight to a maximum of 1.5 mg daily in three divided doses, beginning before the 7th to 8th week of gestation (307, 311). Approximately 70% of prenatally treated females are born with normal or only slightly virilized genitalia. Treatment failures, *i.e.*, affected females requiring genital reconstruction, have been attributed to late onset of treatment, cessation of therapy in midgestation, noncompliance, or suboptimal dosing (312), whereas others had no ready explanation (313). The fetal adrenal cortex may not always be adequately suppressed by these doses of maternally administered dexamethasone. Unaffected newborns treated until birth usually have suppressed steroid secretion for at least 1 week after birth, especially of steroids such as 16 $\alpha$ -hydroxypregnenolone that originate in the fetal zone of the cortex. However, 17-OHP and 21-deoxycortisol metabolites in affected infants may not be suppressed

at birth even with continuous treatment beginning early in gestation (314).

Very few data are available regarding natural variability in genital virilization among family members with the same *CYP21* genotype, although nearly normal genitalia without treatment in relatives of highly virilized patients have been reported anecdotally (315, 316). Nevertheless, the likelihood of severe genital ambiguity is apparently reduced among those prenatally treated compared with their untreated sisters and to all affected girls with similar genotypes. Anecdotal reports suggest that suppression of adrenal androgen secretion is easier to achieve after prenatal treatment (310). The first prenatally treated female has reached late adolescence with normal cognitive development (310). It is not yet possible to determine whether prenatal treatment will induce marked differences in the psychosexual outcome for women with CAH.

Prenatal therapy is usually coupled with prenatal diagnosis (see *Section VI.H*). Since dexamethasone treatment suppresses amniotic fluid adrenocortical hormones, genetic diagnosis must be performed. Although the incidence of fetal deaths in treated pregnancies does not appear to exceed that for the general population [9% spontaneous abortion rate in treated pregnancies, compared with 14% in untreated pregnancies (317)], a high rate of spontaneous abortions has been observed after chorionic villus sampling (CVS) performed to obtain tissue for genetic diagnosis (318). Either amniocentesis or CVS may be done for diagnostic purposes, but the latter should be carried out only in experienced centers at 10–12 weeks gestation (319). If the sex is male, or *CYP21* genotype indicates the fetus is unaffected, dexamethasone should promptly be discontinued to minimize potential risks of glucocorticoid toxicity (Fig. 9).

**2. Therapeutic risks to the fetus.** Most published literature dealing with fetal exposure to glucocorticoids deals with late second or third trimester treatment. Prenatal treatment of CAH is different in that it must begin in the early first trimester to be effective in preventing female genital ambiguity. Since only one of eight fetuses is likely to be an affected female, seven of eight pregnancies will be unnecessarily exposed to at least several weeks of dexamethasone treatment

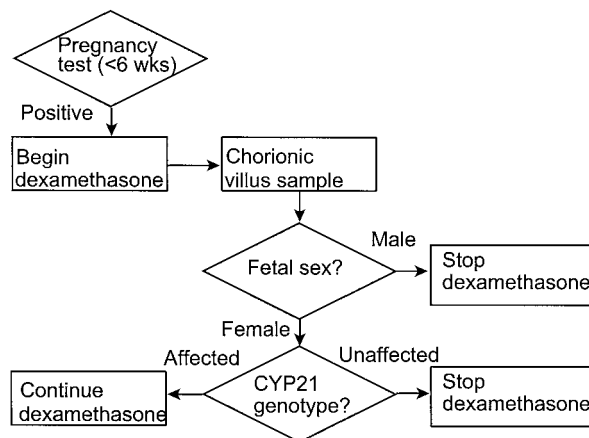

FIG. 9. Flowchart for decisions pertaining to prenatal diagnosis of 21-hydroxylase deficiency. Format is identical to Fig. 5.

before the sex and disease status can be determined. Because the unaffected offspring will not derive any benefit from glucocorticoid treatment, the issue of potential risk is all the more significant. Normal fetal cortisol production is considerably lower than that of children or adults; samples obtained during fetoscopy, show umbilical vein cortisol at 16–20 weeks gestation to average approximately 20 nmol/liter (0.72  $\mu\text{g}/\text{dl}$ ) (320). Thus, providing pharmacological doses of a potent, long-acting glucocorticoid such as dexamethasone might disrupt fetal physiology. Potential risks include congenital malformations such as cardiac septal hypertrophy (321), hydrometrocolpos (322), and hydrocephalus (318). Moreover, the effects of abrupt dexamethasone withdrawal on fetal development are unknown. Intrauterine growth retardation and unexplained fetal death have been observed in 2% or less of treated pregnancies (317); these statistics are not significantly different from those found in the population at large (323). The risk of overt human fetal defects appears to be low compared with complications observed in a rodent model of *in utero* exposure to high-dose glucocorticoids (324), which features frequent cleft palate in addition to fetal growth retardation and/or demise. Pregnant rats treated with dexamethasone, 20  $\mu\text{g}/\text{kg}/\text{day}$  (the same weight-based dose used in human prenatal treatment for CAH), produced litters with average birth weights 14% below those of controls; the offspring were also hypertensive at 6 months, *i.e.*, young adulthood (325). Mid-to-late gestation administration of dexamethasone to fetal rats alters levels of transcription factors important in brain development (326). It is conceivable that more subtle effects of glucocorticoids on the developing human brain may go unnoticed during early life. A pilot study using maternal surveys suggested that children not affected with CAH who were subjected to prenatal dexamethasone treatment were more shy than untreated children (327). However, prenatally treated children have not undergone thorough neuropsychological testing. Recent editorials called attention to these issues, citing numerous studies in animal models showing the dangers of prenatal exposure to glucocorticoids with respect to impairment of somatic growth, brain development, and blood pressure regulation (328–330). An international registry might facilitate long-term studies that could answer many of these questions.

3. *Therapeutic risks to the mother.* The incidence of maternal complications has varied among investigators; overall, it is about 10% (310). In evaluating such data, it is important to correlate the types of adverse side effects observed and the duration of therapy. Both American (331) and European (311) investigators have found a higher incidence of side effects in women treated from the first through third trimesters. Cushingoid features, excessive weight gain, severe striae, hypertension, and hyperglycemia are seen in this setting. These side effects most often resolve with discontinuation of treatment. Weight, blood pressure, and glucose tolerance should be closely monitored in all treated women treated to term. Serial maternal serum dexamethasone levels, if available, might prevent over- and undertreatment, but they have not been followed routinely. Maternal urinary estriol measurements have also been suggested as a guide to adjusting maternal treatment (304). A gradual decrease in the dose of

dexamethasone later in gestation might decrease the incidence of maternal side effects, but there are as yet no data concerning the efficacy of such a regimen. More common maternal side effects in those treated for a shorter duration include edema, gastrointestinal upset, mood fluctuations, acne, and hirsutism; one or more of these symptoms are seen in 10–20% of women treated in early pregnancy.

Because of these concerns, caution should be exercised in recommending prenatal therapy with dexamethasone, and women must be fully informed of potential fetal and maternal risks, some of which may be as yet unrecognized. Additionally, the possibility of lack of therapeutic benefit should be disclosed when obtaining informed consent. However, we emphatically disagree with a recent suggestion (330) that prenatal treatment is so experimental as to require approval by institutional review boards.

Caveats notwithstanding, many parents of affected girls still opt for prenatal medical treatment because of the severe psychological impact of ambiguous genitalia on the child and on the family (332). Similar diagnostic and therapeutic approaches can also be effective in families at risk for 11 $\beta$ -hydroxylase deficiency, in which affected female fetuses may also suffer severe prenatal virilization (333).

4. *Other considerations for genetic counseling.* The most common circumstance in which prenatal treatment is offered to a pregnant woman is when she and her partner have already had a child with CAH, in which case the likelihood of her bearing an affected girl with each successive pregnancy is 1/8.

Other scenarios may arise in genetic counseling. What if one partner has classic CAH and the carrier status of the partner is not known (recognizing that an affected mother will remain on glucocorticoid replacement regardless, but her dose may need to be increased to treat the fetus)? If the carrier frequency for classic CAH in the general population is 1.6% (equivalent to a disease frequency of 1/16,000, see Section IV.B), then the *a priori* likelihood of these parents giving birth to an affected girl is 0.4%, or 1/250 ([1 parent carrying 2 classic alleles]  $\times$  [1.6% carrier frequency in general population]  $\times$  [1/2 chance the carrier parent will pass his or her affected allele to the fetus]  $\times$  [1/2 chance the fetus is female]).

Infants of mothers affected with the nonclassic disorder are also at slightly increased risk of developing classic CAH. Most studies examining genotypes in CAH (Section VI.I) did not specifically target nonclassic patients, and ascertainment biases and ethnic differences make it difficult to draw firm conclusions regarding allele frequencies in the nonclassic CAH patient population. Nevertheless, it appears that at least 50% of women clinically ascertained to have nonclassic CAH are compound heterozygotes for a classic and a nonclassic mutation (209, 210, 334). Accepting this figure, there is *a priori* approximately a 0.1% (1/1000) chance that a mother with nonclassic disease will give birth to a daughter affected with classic CAH ([50% carrier frequency of classic alleles among women with nonclassic disease]  $\times$  [1.6% carrier frequency in general population]  $\times$  [1/4 chance both classic alleles will be passed to the fetus]  $\times$  [1/2 chance the fetus is female]).

In each of these scenarios, the risk of having an affected

daughter is far less than the 1:8 risk with two known classic 21-hydroxylase deficiency carriers. Thus, prenatal therapy is not warranted unless the carrier status of the mate (as well as the genotype of a nonclassic patient) is first ascertained by hormonal testing and/or genotyping as part of preconception genetic counseling. This may be desired by some but not all couples. It may nevertheless be prudent to measure 17-OHP in such at-risk infants after birth, remembering that basal hormone measurements may not be sufficient to diagnose nonclassic CAH in infants and young children.

### VI. Molecular Genetic Analysis

#### A. Biochemistry of CYP21

Steroid 21-hydroxylase (P450c21, CYP21) is a microsomal cytochrome P450 enzyme that converts 17-OHP to 11-deoxycortisol and progesterone to DOC (335–341). As with other microsomal P450s, the enzyme accepts electrons from an NADPH-dependent cytochrome P450 reductase (336), thus reducing molecular oxygen and hydroxylating the substrate. The P450 reductase is required because NADPH donates electrons in pairs, whereas P450s can only accept single electrons (342).

Human CYP21 normally contains 494 amino acid resi-

dues (343, 344) [a normal variant has an extra leucine within the N-terminal hydrophobic domain and thus contains 495 residues (345)] and has a molecular mass of approximately 52 kDa. When expressed in mammalian cells, human recombinant CYP21 has apparent  $K_m$  values for 17-OHP and progesterone of 1.2 and 2.8  $\mu\text{M}$ , respectively, and the apparent  $V_{\text{max}}$  for 17-OHP is twice that of progesterone (346).

#### B. Structure-function relationships

Alignment of the amino acid sequences of many P450s have identified a small number of strongly conserved residues that are presumed to be important for catalytic function (347, 348). The basic three-dimensional structure of P450 enzymes has been deduced from x-ray crystallographic studies of four bacterial P450s. The first of these, P450cam (CYP101, camphor 5-exo-hydroxylase from *Pseudomonas putida*), is a soluble molecule that bears little similarity in primary structure (roughly 15%) to eukaryotic P450s (349); P450terp (350) and P450eryF (351), bacterial P450s structurally related to P450cam, have also been characterized. In contrast, P450BM-3 (CYP102 from *Bacillus megaterium*), is a complex protein consisting of a P450-

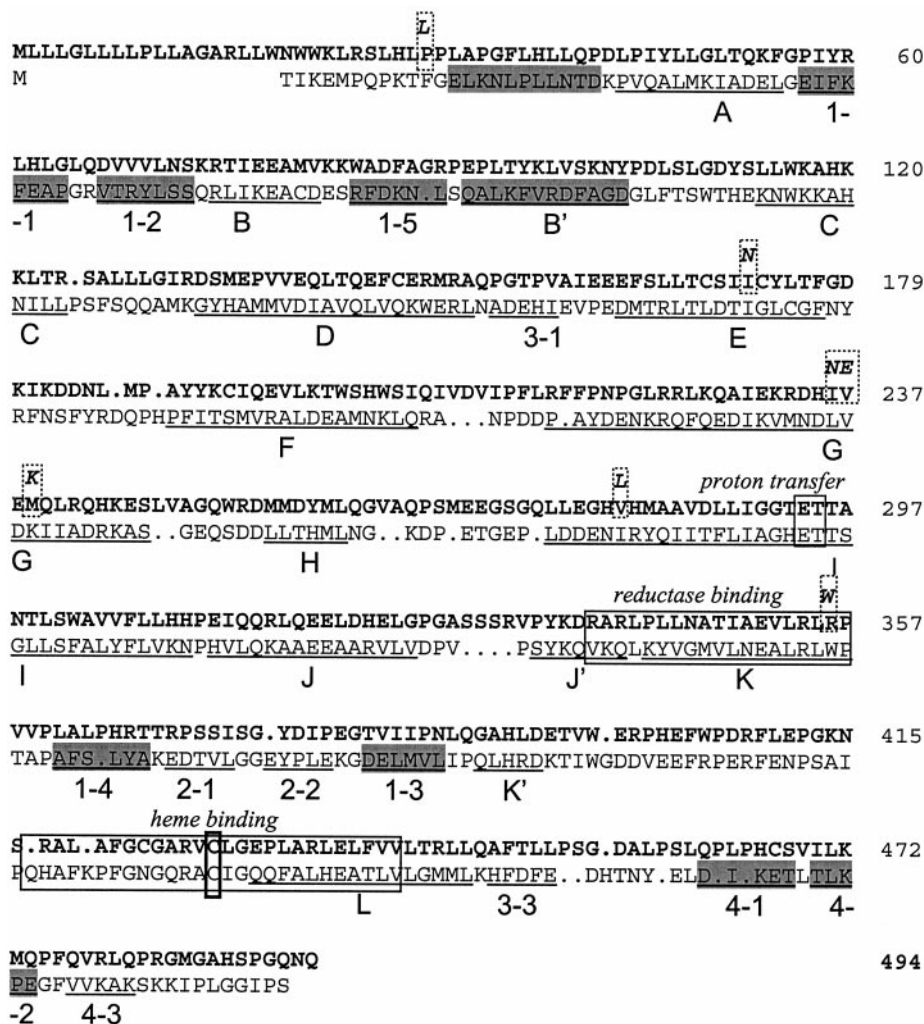

FIG. 10. Alignment of amino acid sequences of human CYP21 (top) (343, 344) with the sequence of CYP102 from *B. megaterium* (bottom); the alignment is as described (354). The amino acid residues of CYP21 are numbered to the right of each line. For an explanation of single letter amino acid codes, see Table 3. Features of the secondary structure of CYP102 determined by x-ray crystallography are underlined;  $\alpha$ -helices are denoted by letters, and  $\beta$  strands by numbers. Labeling of these elements is as described in Ref. 353. Regions of presumed functional importance are boxed and labeled; possible substrate binding regions are shaded. Frequently occurring missense mutations in CYP21 are listed above the sequence and are each surrounded by a broken line.

like N-terminal domain and a C-terminal domain that is 35% identical to eukaryotic cytochrome P450 reductase. The P450 domain is 25–30% identical to the eukaryotic CYP4 and CYP52 families (352) and approximately 20% identical to CYP21 (Fig. 10). This domain has been subjected to crystallographic analysis (353). Its sequence has been aligned with CYP21 and used as the basis for three-dimensional modeling of CYP21 (354). Based on thermodynamic considerations, this model may not be as accurate as analogous models of other eukaryotic P450s such as CYP19 (aromatase) (355) or CYP17 (17-hydroxylase) (356). Nevertheless, based on these analyses and functional studies, several conclusions may be drawn.

**1. Heme binding.** The heme iron is critical for catalytic function of P450s. Of its six coordination positions, four interact with the protoporphyrin ring. One of the two axial positions is coordinated to the sulfhydryl group of a completely conserved cysteine (C428 in CYP21), which is located in a relatively highly conserved "heme binding peptide" near the C-terminus. Mutation of C428 in CYP21 destroys enzymatic activity (357).

**2. Oxygen and water binding.** The ligand at the other axial position of heme is either a water or an oxygen molecule. When an oxygen molecule is bound, it is parallel to the axis of coordination with the iron atom. An H<sub>2</sub>O molecule is consistently present in a groove in the "I" helix adjacent to strongly conserved acidic (aspartate or glutamate) and threonine residues (E294 and T295 in CYP21). Mutation of the corresponding threonine in several other P450s destroys or drastically decreases enzymatic activity (358, 359).

According to one of the several proposed models of P450 catalysis (360), the first step of the reaction is binding of substrate to oxidized (ferric, Fe<sup>+3</sup>) enzyme. One electron is donated from P450 reductase to the enzyme so that the iron is in the reduced (ferrous, Fe<sup>+2</sup>) state. This complex binds molecular oxygen and then accepts a second electron from the accessory protein, leaving the bound oxygen molecule with a negative charge. Two protons are then donated in succession to the water molecule by the carboxyl group of the acidic residue, transferred to the hydroxyl of the conserved threonine, and finally donated to the distal oxygen atom (353). The distal oxygen atom is then released as a water molecule, leaving the iron in the Fe<sup>+3</sup> state. The remaining oxygen atom is highly reactive (the iron-oxygen complex is a "ferryl" moiety) and attacks the substrate, resulting in an hydroxylation.

**3. Substrate binding.** Like most P450 substrates, steroids are relatively hydrophobic molecules. Thus, it is likely that the substrate binding site(s) will consist primarily of hydrophobic amino acid residues.

*A priori*, it was possible that the substrate binding sites of steroid-metabolizing P450s would more closely resemble each other in sequence than the substrate binding sites of other P450s such as xenobiotic metabolizing enzymes. Comparisons of the sequences of 21 and 17-hydroxylase and cholesterol desmolase (CYP21, CYP17, and CYP11A) identified two highly conserved areas, one near the N terminus

(Q53-R60 in CYP21) and the other toward the C terminus (L342-V358 in CYP21) (361, 362).

The crystal structure of CYP102 confirms that part of the first of these indeed corresponds to a portion of a deep pocket constituting the substrate binding site ( $\beta$ -sheet 1–1, residues E38-A44 in CYP102). However, the second conserved area corresponds to helix K (L311-W325 of CYP102), which does not interact with substrate. Instead, this region forms part of the docking site for the accessory electron transport protein, cytochrome P450 reductase. The remainder of segments that form the substrate binding pocket are widely distributed in the peptide (remainder of  $\beta$ -sheet 1, B' and F helices) and the sequence conservation among steroid metabolizing P450s is not particularly strong in these regions.

**4. Binding to accessory proteins.** Microsomal and mitochondrial P450s accept electrons from cytochrome P450 reductase or adrenodoxin, respectively. In either case chemical modification studies suggest that basic amino acids (usually lysine) on the P450 interact with acidic residues on the accessory protein. The crystallographic studies of CYP102 suggest a docking site for reductase formed in part by helices B, C, D, J', and K. Helix K, as mentioned, was previously thought to interact with substrate. Support for the idea that it is instead required for redox interactions (with cytochrome P450 reductase or adrenodoxin, depending on the type of P450) comes from mutagenesis studies of CYP11A, wherein modification of either of two lysine residues in helix K destroys enzymatic activity without affecting substrate binding (363). In similar studies of CYP17, mutagenesis of arginine residues in this region disrupts interactions with cytochrome P450 reductase and cytochrome b<sub>5</sub> (364). There are several naturally occurring mutations of arginine residues (R354 and R356) in this region of CYP21 that drastically decrease enzymatic activity (365–367).

Only two basic residues, one in helix K and the other in the heme binding peptide (R323 and R398 in CYP102, corresponding to R354 and R426 in CYP21), are completely conserved in all eukaryotic P450s, suggesting that other positively charged residues that are not completely conserved may be necessary for binding to the accessory protein (368).

### C. CYP21 gene structure

The structural gene encoding human CYP21 (*CYP21*, *CYP21A2*, or *CYP21B*) and a pseudogene (*CYP21P*, *CYP21A1P*, or *CYP21A*) are located in the *HLA* major histocompatibility complex on chromosome 6p21.3 approximately 30 kb apart, adjacent to and alternating with the *C4B* and *C4A* genes encoding the fourth component of serum complement (369, 370) (Fig. 11). In addition the *RP1* (*G11*) gene is located immediately 5' of *C4A* and encodes a putative nuclear protein similar to DNA helicase; a truncated copy of this gene, *RP2*, is located between *CYP21P* and *C4B* (371, 372). The *CYP21*, *C4*, and *RP* genes are transcribed in the same direction. *CYP21* overlaps a gene on the opposite DNA strand (*OSG*, *XB*, or *TNXXB*) that encodes a putative extracellular matrix protein, tenascin-X (373). *CYP21P* overlaps a truncated copy of this gene (*TNXA*) that does not encode a functional protein.

*CYP21* and *CYP21P* each contain 10 exons spaced over 3.1

kb. Their nucleotide sequences are 98% identical in exons and approximately 96% identical in introns (343, 344). Mutations in *CYP21P* are discussed in Section VI.F.

#### D. Transcription

1. *Naturally occurring transcripts.* For purposes of this review, the most important gene transcript in the C4-*CYP21* region is that of *CYP21* itself, which begins 10–11 nt before the initial AUG codon. Whereas the *C4A*, *C4B*, and *TNXB* genes are mainly expressed in other tissues, the truncated *TNXA* gene is transcribed in an adrenal-specific manner (374).

*CYP21P* is also transcribed specifically in the intact adrenal cortex at a level 10–20% that of *CYP21* (375). However, the first 2 introns are inconsistently spliced out, and an uncertain

proportion of transcripts include additional exons in the region between the end of *CYP21P* and the beginning of *C4B*. Some of these exons may overlap the truncated *TNXA* gene (375). In contrast, *CYP21P* transcripts cannot be detected in primary cultures of human adrenocortical cells, whereas *CYP21* is appropriately expressed under the same conditions (376, 377). In any case, *CYP21P* transcripts do not contain a long open reading frame and are of uncertain functional significance (378). Adrenal transcripts in the same direction as *CYP21* have also been detected overlapping *TNXB*; these are also of uncertain functional significance (375, 378).

2. *Hormonally induced expression.* The primary factor regulating *CYP21* expression in the zona fasciculata of the adrenal cortex is ACTH (reviewed in Ref. 20). ACTH induction is mediated mainly through increased transcription (379, 380), is duplicated by cAMP and related agonists such as forskolin, and requires protein kinase A (381). This is consistent with the known mode of action of ACTH.

Factors inducing expression of *CYP21* in H295R human adrenocortical carcinoma cells include cAMP (the second messenger for ACTH) and angiotensin II, which acts primarily through the protein kinase C pathway but also through  $Ca^{2+}$  signaling (382). The cAMP and protein kinase C pathways also induce *CYP21* expression in primary cultures of human adrenocortical cells, as do insulin and IGF-I (377).

3. *5'-Flanking sequences controlling transcription.* In cultured mouse Y-1 or human H295 adrenocortical cells, the 5'-flanking region of human *CYP21* drives basal expression of reporter constructs at levels 2.5–8 times higher than the corresponding region of *CYP21P* (376, 383, 384). Sequences responsible for this difference have been localized to the first 176 nucleotides (376) although sequences upstream of this region are required for full expression (in this discussion, we will number nucleotides from the start of translation, as different numbering systems have been used by different authors). There are only 4 nucleotide differences between *CYP21P* and *CYP21* in the proximal 176 nucleotides (Fig. 12). It appears that the most important differences are at nucleotide –113, which is a G in *CYP21* and an A in *CYP21P*, and at –126, which is a C in *CYP21* and a T in *CYP21P* (384). The latter polymorphism is in the middle of a binding site for the Sp1 transcription factor from –123 to –129; the *CYP21P* sequence binds this factor much less well. Moreover, –126C

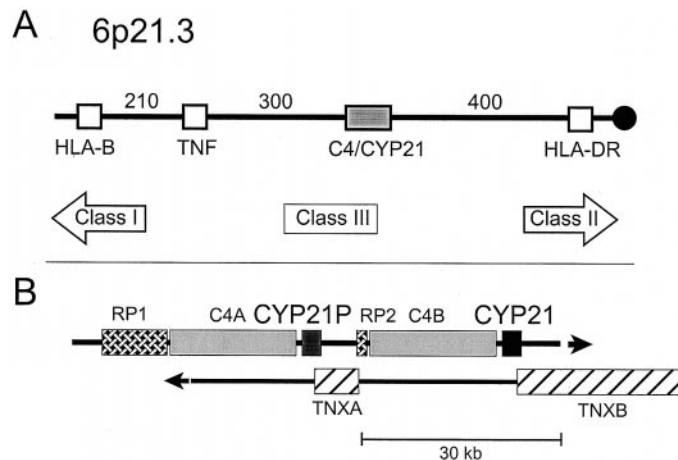

FIG. 11. A, location of the *CYP21* genes within the HLA major histocompatibility complex on chromosome 6p21.3. There are many more genes in this region than are indicated. The direction of the centromere is indicated by the circle at the right end of the line. Numbers denote distances between genes in kilobasepairs (kb). *HLA-B* is the nearest Class I transplantation antigen gene to *CYP21*, and *HLA-DR* is the nearest Class II gene. The region between these classes of genes is termed "Class III." *TNF*, Tumor necrosis factor (actually two genes). The *C4/CYP21* region is diagrammed in panel B. B, Map of the genetic region around the 21-hydroxylase (*CYP21*) gene. Arrows denote direction of transcription. *CYP21P*, 21-Hydroxylase pseudogene; *C4A* and *C4B*, genes encoding the fourth component of serum complement; *RP1*, gene encoding a putative nuclear protein of unknown function; *RP2*, truncated copy of this gene. *TNXB*, tenascin-X gene and *TNXA*, a truncated copy of this gene, are on the opposite chromosomal strand. The 30-kb scale bar is positioned to show the region involved in the tandem duplication.

FIG. 12. Transcriptional regulatory sequences in *CYP21*. The sequences are numbered from the start of translation so that the +1 position is the first nucleotide of the initial ATG, and the –1 position is the first nucleotide 5' of this. Putative or actual transcription factor binding sites (discussed in the text) (376) are boxed and marked. Segments known to be required for cAMP regulation (386) are underlined. Nucleotides at which *CYP21* and *CYP21P* differ are denoted by the *CYP21P* sequence below the *CYP21* sequence; those in boldface affect gene expression (384). The triangle denotes start site for transcription.

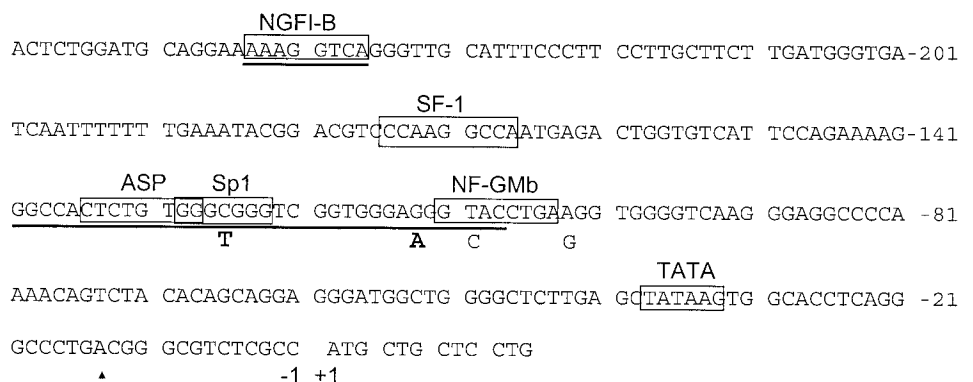

is at one end of an overlapping binding site for an additional transcription factor termed "adrenal specific protein" (ASP). ASP has not yet been fully characterized but is presumed to bind DNA through zinc fingers as do nuclear hormone receptors (385–387). In contrast, –113G does not lie within a canonical binding site for any known transcription factor, but it is similar to an Sp1 site, and mutation of this nucleotide does interfere with binding of Sp1 (384). There is a site at –110/–103 that could bind the nuclear factor NF-GMb, which, as far as is known, is specific for granulocytes and macrophages (388). Mutating nucleotide –110 does not have major effects on expression, and so the significance of this putative binding site is uncertain.

Another nuclear factor critical for basal expression of mouse *Cyp21* (389) is steroidogenic factor-1 (SF-1, also called Ad4BP). This is an "orphan" nuclear hormone receptor that is required not only for expression of most steroid hydroxylases but also for the embryonic development of the adrenal gland and gonads (reviewed in Ref. 50). Human *CYP21* contains a consensus SF-1 site (CCAAGGCCA, with the *underlined* positions being most important for binding) at –169/–175 (343, 344). However, to the best of our knowledge, the function of this site in the human gene has never been experimentally tested.

Although *CYP21* is known to respond to cAMP, the 5'-flanking region does not contain a canonical cAMP response element (a CRE, which is TGACGTC A or a variant thereof). Two regions have been implicated in cAMP responsiveness because they confer such responsiveness on heterologous reporter constructs. The first is a segment from –140/–107, which contains the aforementioned Sp1 and ASP recognition sites (385, 386), and the second extends from –244/–237 and binds the transcription factor NGFI-B (nerve growth factor inducible-B, also called Nur77)(390). Mutation of either of these sites destroys cAMP responsiveness (376, 386); moreover, cotransfection with an NGFI-B expression plasmid transactivates *CYP21* reporter constructs (376, 390). NGFI-B is constitutively present in Y-1 mouse adrenocortical cells but is phosphorylated within the DNA-binding domain and does not bind DNA. Treatment with ACTH results in *de novo* synthesis of unphosphorylated protein that is able to bind DNA and is transcriptionally active (391).

*4. More distal elements.* Whereas 330 nucleotides of 5'-flanking sequences from the mouse *Cyp21* gene are sufficient for expression of reporter constructs in cultured Y-1 cells (381), even 2.2 kb of flanking sequences are unable to direct expression to the adrenal gland in transgenic mice (392). At least 6.4 kb of such sequences are required; the necessary sequences are localized to two short sequences 5–6 kb upstream of *Cyp21*, located within the adjacent *Slp* gene (an inactive homolog of complement C4)(392). These sequences may constitute a locus control region. Such regions are required to establish a tissue-specific open chromatin domain in the vicinity of a particular locus and thus permit appropriate tissue-specific expression; the first one identified was in the  $\beta$ -globin cluster (393). In addition to their effects on chromatin, elements within certain locus control regions can act as transcriptional enhancers, and that is the case for both of the elements in *Slp* when they are tested in mouse Y-1 cells.

Even these sequences may not be sufficient for full expression of *Cyp21*, because the levels of expression of reporter constructs in transgenic animals are low compared with the intrinsic *Cyp21* gene (394).

It is not yet certain whether a similar region exists in humans, but a cryptic adrenal specific promoter has been located within the *C4A* gene (395). The finding that the truncated *TNXA* gene is expressed specifically in the adrenal gland (396), although its promoter has been deleted by the duplication of the entire *C4-CYP21-TNX* locus, suggests that there is, at least, an adrenal-specific enhancer that is able to influence expression of several adjacent genes.

#### E. HLA linkage

CAH due to 21-hydroxylase deficiency is inherited as a monogenic autosomal recessive trait closely linked to the *HLA* complex, meaning that siblings who have 21-hydroxylase deficiency are almost invariably *HLA* identical (397, 398). Before cloning of *CYP21*, *HLA* typing was the main way to perform prenatal diagnosis (399)(see Section VI.H). In addition, particular forms of 21-hydroxylase deficiency are associated with particular combinations of *HLA* antigens, or haplotypes; this phenomenon is referred to as genetic linkage disequilibrium. The most interesting is an association between the salt wasting form of the disease and *HLA-A3; Bw47; DR7* most characteristically seen in Northern European populations. In addition to 21-hydroxylase deficiency, this haplotype usually carries a null allele at one of the two *C4* loci encoding the fourth component of serum complement (400, 401). Before cloning of *CYP21*, this was strongly suspected to represent a contiguous gene syndrome due to a single deletion of *C4* and 21-hydroxylase genes; this was confirmed shortly after *CYP21* was cloned (2, 370). The deletion apparently occurred after the haplotype was generated, because the identical haplotype without the deletion has been identified in the Old Order Amish (402). The nonclassic form of 21-hydroxylase deficiency is often associated with *HLA-B14; DR1*, particularly in Eastern European Jewish populations (58, 403, 404). This haplotype is associated with the V281L mutation in *CYP21* (see below) and with a duplication of complement *C4A* and the *CYP21P* pseudogene (405, 406). Finally, *HLA-A1; B8; DR3* is negatively associated with 21-hydroxylase deficiency. This haplotype has a *C4A* null allele and is associated with deletion of the *C4A* and *CYP21P* genes (370, 407). Thus, comparison of a very few individuals homozygous for *HLA-A3; Bw47; DR7* or *A1; B8; DR3* strongly suggested that the *CYP21* gene (then called the 21-hydroxylase "B" gene) was an active gene, whereas the *CYP21P* gene (21-hydroxylase "A") was a pseudogene (370).

Using pulsed field gel electrophoresis, *CYP21* has been mapped approximately 600 kb centromeric of *HLA-B* and 400 kb telomeric of *HLA-DR*. It is transcribed in the telomeric to centromeric direction (408, 409).

#### F. Mutations causing 21-hydroxylase deficiency

Most mutations causing 21-hydroxylase deficiency that have been described thus far are apparently the result of either of two types of recombinations between *CYP21*, the



normally active gene, and the *CYP21P* pseudogene. These two mechanisms are unequal crossing over during meiosis, resulting in a complete deletion of *C4B* and a net deletion of *CYP21* (2, 405, 410), or apparent gene conversion events that transfer deleterious mutations normally present in *CYP21P* to *CYP21* (206, 411–417).

The deleterious mutations in *CYP21P* include an A→G substitution 13 nucleotides (nt) before the end of intron 2 that results in aberrant splicing of pre-mRNA, an 8-nt deletion in exon 3 and a 1-nt insertion in exon 7, each of which shifts the reading frame of translation, and a nonsense mutation in codon 318 of exon 8 (343, 344). There are also 8 missense mutations in *CYP21P*, 7 of which have been observed in patients with 21-hydroxylase deficiency (Fig. 13 and Table 4).

Because particular mutations occur in many unrelated kindreds, each mutation, and the degree of enzymatic compromise it causes, may be correlated with the different clinical forms of 21-hydroxylase deficiency (*i.e.*, salt wasting, simple virilizing, and nonclassic disease) (Tables 1, 4, and 5, and see Section VI.I) (34, 209, 334, 418–432).

The functional effects of missense mutations have been assessed *in vitro* by recreating them in *CYP21* cDNA and expressing the mutant cDNA using an appropriate expression vector. Several systems have been used including transfection of plasmids in mammalian cells (365, 366, 414, 433–437), infection of mammalian cells with recombinant vaccinia

virus (346, 438, 439), or expression in yeast (357, 434, 435, 440) or bacteria (441). In general, these systems have yielded similar results regarding the effects of particular mutations on enzymatic activity. The simplest way to compare these studies is to consider whether a particular mutation destroys, drastically reduces, or partially reduces enzymatic activity. A more quantitative way is to express mutant enzymatic activity as a percentage of wild-type activity. For experiments done in whole cells, enzymatic activity is most reliably measured with substrate concentrations below the  $K_m$  for the enzyme and for incubation times that convert a relatively small proportion of substrate to product (*i.e.*, that remain in the linear phase of the reaction). It is probably meaningless to attempt to derive apparent kinetic constants from measurements in whole cells, considering that glucocorticoids are subject to transport out of cells by mechanisms that may have their own kinetics (442). Conversely, certain *CYP21* mutants are relatively unstable when cells are broken (346), and it may be difficult to correlate the apparent kinetic constants obtained under such circumstances with activities *in vivo*. When apparent kinetic constants are obtained, first order rate constants ( $V_{max}/K_m$ ) are conceptually similar to "enzymatic activity" and tend to be more reproducible across different studies than the individual apparent kinetic constants,  $V_{max}$  and  $K_m$ .

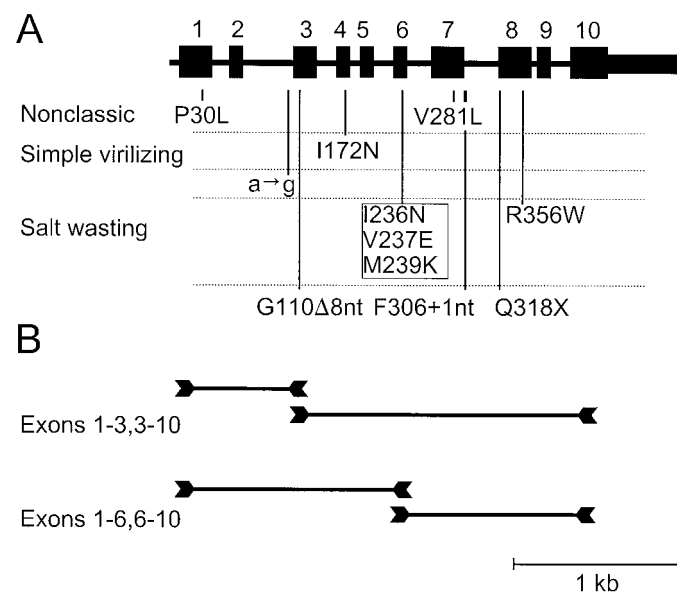

FIG. 13. Mutations causing steroid 21-hydroxylase deficiency. A, Diagram of a *CYP21P* gene. Exons are numbered. *CYP21P* has nine deleterious mutations that may be transferred into *CYP21* by gene conversion, causing 21-hydroxylase deficiency. See Table 4 for terminology. The three mutations in the box are invariably inherited together. These mutations are characteristically associated with different forms of 21-hydroxylase deficiency; the mutations at the bottom of the panel cause the most severe enzymatic deficiency. There are several dozen additional rare mutations that collectively account for 5% of all 21-hydroxylase deficiency alleles; these are not shown. B, Bars represent overlapping fragments that may be amplified by PCR for detecting these mutations. *CYP21*-specific priming sites are located in exons 3 and 6, where *CYP21P* contains an 8 nucleotide deletion (G110Δ8nt) or a cluster of three missense mutations (I236N/V237E/M239K), respectively. A 1-kb scale is displayed.

1. *Deletions and large gene conversions.* Large deletions involving *C4B* and *CYP21* comprise approximately 20% of alleles in patients with classic 21-hydroxylase deficiency in most populations (Table 5) but are rarer in some Latin American countries (443, 444). Many deleted alleles are associated with the *HLA* haplotype *A3;Bw47;DR7* (2). Deletions usually extend approximately 30 kb from somewhere between exons 3 and 8 of *CYP21P* through *C4B* to the corresponding point in *CYP21*, yielding a single remaining *CYP21* gene in which the 5'-end corresponds to *CYP21P*, and the 3'-end corresponds to *CYP21* (Fig. 14) (396, 410, 445). Deleterious mutations within the *CYP21P* portion render such a gene incapable of encoding an active enzyme. All patients who carry homozygous deletions suffer from the salt wasting form of the disorder.

Unequal cross-overs may occur anywhere within the duplicated 30-kb region including the *RP*, *C4*, and *TNX* genes (446), and chromosomes with 1 or 3 copies of the 30-kb region occur frequently (447, 448); such rearrangements are found on 16% and 12% of chromosomes 6, respectively (446). Only cross-over breakpoints within or 3' of the *CYP21* genes cause 21-hydroxylase deficiency; breakpoints in the *C4* genes delete *CYP21P* and one of the *C4* genes, as is seen with the common *HLA* haplotype *A1;B8;DR3* (370, 407). Thus there is apparently no strong selection against chromosomes with 1 or 3 copies of the 30-kb region as long as *CYP21* remains intact.

One kindred carries an unusual deletion extending into the *TNXB* gene; the patients in this kindred have a contiguous gene syndrome including 21-hydroxylase deficiency and a form of Ehlers-Danlos syndrome caused by loss of function of tenascin-X (449). However, an unrelated patient with 21-hydroxylase deficiency and a similar heterozygous deletion apparently had no additional problems (446).

In most studies (2, 34, 370, 405, 406, 410, 419–421, 423,

TABLE 4. Mutations causing 21-hydroxylase deficiency

| Name <sup>a,b</sup>      | Mutation/nt <sup>c</sup> | E/I <sup>d</sup> | Activity % nl <sup>e</sup> | Effect                            | Clinical severity <sup>f</sup> | References |
|--------------------------|--------------------------|------------------|----------------------------|-----------------------------------|--------------------------------|------------|
| *Deletion                |                          |                  | 0                          | No enzyme                         | SW                             | (2)        |
| *Conversion              |                          |                  | 0                          | No enzyme                         | SW                             | (411)      |
| *+L9                     | 28 +CTG                  | E1               | 100                        | Normal polymorphism               | Normal                         | (345)      |
| W22X                     | 66 G→A                   | E1               | 0                          | Nonsense                          | SW                             | (474)      |
| W22+1nt                  | 64+T                     | E1               | 0                          | Frameshift                        | SW                             | (483)      |
| *P30L                    | 89 C→T                   | E1               | 30–60                      | ?Orientation in ER                | NC                             | (438)      |
| P30Q                     | 89 C→A                   | E1               | 0                          | ?Orientation in ER                | SW                             | (469)      |
| Y47Δ1 nt                 | 138ΔT                    | E1               | 0                          | Frameshift                        | SW                             | (484)      |
| Intron 1 splice acceptor | 295 A→G                  | I1               |                            | Abnormal splicing                 | SW                             | (474)      |
| G90V                     | 366 G→T                  | E2               | 0                          |                                   | SV                             | (367,475)  |
| Intron 2 splice donor    | 387 G→A                  | I2               |                            | Abnormal splicing                 |                                | (478)      |
| *Intron 2 "g"            | 656 A/C→G                | I2               | <5                         | Abnormal splicing                 | SV-SW                          | (414,418)  |
| Y97X                     | 670 C→A                  |                  | 0                          | Nonsense                          |                                | (476)      |
| K102R                    | 684 A→G                  | E3               |                            | Normal polymorphism               | Normal                         | (345)      |
| P105L                    | 693 C→T                  | E3               | 60                         |                                   | NC                             | (473)      |
| *G110Δ8nt                | Δ708-715                 | E3               | 0                          | Frameshift                        | SW                             |            |
| C168Δ1nt                 | 991-992 TG→A             | E4               | 0                          | Frameshift                        | SW                             | (485)      |
| *I172N                   | 1001 T→A                 | E4               | 1                          | ?Insertion in ER                  | SV                             | (346,415)  |
| G178A                    | 1019 G→C                 | E5               | 0–19                       |                                   | SW                             | (367,475)  |
| D183E                    | 1123 C→G                 | E5               | 100                        | Normal polymorphism               | Normal                         | (418)      |
| ΔE196                    | Δ1160-1162               | E5               | 6–23                       | Unstable enzyme                   |                                | (437)      |
| *I236N                   | 1382 T→A                 | E6               | 0                          | ?Substrate binding                | SW                             | (346,415)  |
| *V237E                   | 1385 T→A                 |                  |                            |                                   |                                |            |
| *M239K                   | 1391 T→A                 |                  |                            |                                   |                                |            |
| S268T                    | 1647 G→C                 | E7               | 100                        | Normal polymorphism               | Normal                         | (345,438)  |
| *V281L                   | 1685 G→T                 | E7               | 20–50                      | ?Insertion in ER<br>?Heme binding | NC                             | (206,346)  |
| G291S                    | 1715 G→A                 | E7               | 0.8                        | ?Proton transfer from             | SW                             | (437,473)  |
| G291C                    | 1715 G→T                 | E7               |                            | H <sub>2</sub> O to heme          | SW                             | (367,475)  |
| W302X                    | 1750 G→A                 | E7               | 0                          | Nonsense                          | SW                             | (477)      |
| *F306+1nt                | 1759+T                   | E7               | 0                          | Frameshift                        | SW                             |            |
| Intron 7 splice donor    | 1781 G→C                 | I7               |                            | Abnormal splicing                 | SW                             | (480)      |
| Intron 7 splice donor    | 1782 T→G                 | I7               |                            | Abnormal splicing                 |                                | (427)      |
| R316X                    | 1990 C→T                 | E8               | 0                          | Nonsense                          | SW                             | (478)      |
| *Q318X                   | 1996 C→T                 | E8               | 0                          | Nonsense                          | SW                             | (416)      |
| S330Δ10nt                | Δ2032-2041               | E8               | 0                          | Frameshift                        | SW                             | (478)      |
| R339H                    | 2060 G→A                 | E8               | 20–50                      |                                   | NC                             | (439)      |
| R354H                    | 2105 G→A                 | E8               | 0                          | Interactions with<br>reductase    |                                | (367,475)  |
| *R356W                   | 2110 C→T                 | E8               | 0                          | Interactions with<br>reductase    | SW                             | (365)      |
| R356P                    | 2111 G→C                 | E8               | 0.2                        | Interactions with<br>reductase    |                                | (366)      |
| R356Q                    | 2111 G→A                 | E8               | 1                          | Interactions with<br>reductase    |                                | (366)      |
| E380D                    | 2267 G→T                 | E9               | 30                         | Decreased heme binding            |                                | (479,540)  |
| V397+16 nt               | Duplication<br>2303-2318 | E9               | 0                          | Frameshift                        | SW                             | (478)      |
| W405X                    | 2341 G→A                 | E9               | 0                          | Nonsense                          | SW                             | (480)      |
| G424S                    | 2494 G→A                 | E10              |                            |                                   | SV                             | (481)      |
| P453S                    | 2580 C→T                 | E10              | 20–50                      |                                   | NC                             | (439,472)  |
| P475Δ1nt                 | Δ2649                    | E10              | 0                          | Frameshift                        |                                | (427)      |
| R483P                    | 2672 G→C                 | E10              | 1–2                        | Unstable enzyme                   |                                | (482)      |
| R483Δ1nt                 | 2672-2273<br>GG→C        | E10              | 0                          | Frameshift                        | SW                             | (473)      |
| N493S                    | 2702 A→G                 | E10              | 100                        | Normal polymorphism               | Normal                         | (345)      |

<sup>a</sup> Δ, Deletion; +, insertion; nt, nucleotide. Single letter amino acid codes: A, alanine; C, cysteine; D, aspartic acid; E, glutamic acid; F, phenylalanine; G, glycine; H, histidine; I, isoleucine; K, lysine; L, leucine; M, methionine; N, asparagine; P, proline; Q, glutamine; R, arginine; S, serine; T, threonine; V, valine; W, tryptophan; Y, tyrosine; X, stop codon. As an example of mutation terminology, W22X is a nonsense mutation of tryptophan-22.

<sup>b</sup> Asterisks (\*) denote mutations generated by intergenic recombinations between *CYP21* and *CYP21P*.

<sup>c</sup> Nucleotides are numbered beginning with the A in the initial ATG of the coding sequence. Introns are included. Numbering is based on a consensus of sequences from Refs. 343–345; in general, numbers are 3 less than those in Ref. 345. A, C, G, and T are nucleotides and are not to be confused with single letter amino acid codes.

<sup>d</sup> E, Exon; I, intron.

<sup>e</sup> Activity when the mutant enzyme is expressed in cultured cells. When 2 numbers are present, the higher and lower numbers denote activity using 17-hydroxyprogesterone and progesterone as substrates, respectively. nl, Normal.

<sup>f</sup> SW, Salt wasting; SV, simple virilizing; NC, nonclassic.

TABLE 5. Frequency of common mutations among 21-hydroxylase deficiency alleles in different populations<sup>a</sup>

| Nationality   | Total no. alleles | Del <sup>b</sup> | Large conv <sup>b</sup> | P30L | 656g <sup>b</sup> | Δ8nt <sup>b</sup> | I172N | V281L | Q318X | R356W | Other conv, ? <sup>c</sup> | Not conv, unknown <sup>d</sup> | References |
|---------------|-------------------|------------------|-------------------------|------|-------------------|-------------------|-------|-------|-------|-------|----------------------------|--------------------------------|------------|
| USA           | 394               | 26               | 5                       | 2    | 31                | 3                 | 10    | 9     | 4     | 4     | 4                          | 3                              | (34,209)   |
| Sweden        | 400               |                  | 32                      | 2    | 27                | 1                 | 20    | 6     | 2     | 3     | <5                         | <3                             | (420,424)  |
| England       | 284               |                  | 45                      | 0    | 30                | 0                 | 7     | 0     | 0     | 10    | 0                          | 8                              | (431)      |
| England       | 220               |                  | 23                      | 2    | 31                |                   | 14    | 7     |       |       | 3                          | 19                             | (425)      |
| France        | 258               | 19               | 4                       | NA   | 21                | 3                 | 9     | 17    | 4     | NA    | 6                          | 17                             | (334,419)  |
| Finland       | 102               | 34               | 6                       |      | 12                |                   | 29    | 3     | 2     |       | 10                         | 4                              | (423)      |
| Italy         | 146               |                  | 26                      | 3    | 20                |                   | 6     | 11    | 8     |       | 12                         | 14                             | (422)      |
| Italy (south) | 50                |                  | 8                       | 0    | 56                | 2                 | 6     | 6     | 4     | 4     | 4                          | 2                              | (430)      |
| Spain         | 58*               | 16               | 10                      | 2    | 26                | 5                 | 2     | 17    | 3     | 3     | 5                          | 9                              | (421)      |
| Japan         | 102               |                  | 18                      | 0    | 29                | 0                 | 13    | 1     | 0     | 13    | 3                          | 26                             | (418)      |
| China         | 40                |                  | 20                      |      | 25                |                   | 28    |       | 8     | 10    | 5                          |                                | (426)      |
| Chile         | 126               |                  | 21                      |      | 19                |                   | 7     |       | 9     | 11    | 10                         | 12                             | (429)      |
| Mexico        | 94                |                  | 1                       | 9    | 48                | 2                 | 12    | 9     | 4     | 7     | 1                          | 24                             | (427)      |
| Brazil        | 74                | 8                | 14                      |      | 25                | 1                 | 19    | 4     | 11    | 8     | 5                          | 15                             | (508)      |
| Argentina     | 72                |                  | 18                      |      | 18                | 3                 | 15    |       | 14    | 6     |                            | 27                             | (428)      |

<sup>a</sup> Studies included were large, genotyped most known mutations and included parental genotyping (thus allowing phase of different mutations to be determined). If several studies from the same group were available, the most complete and recent data were included.

<sup>b</sup> See Table 4 for descriptions of mutations. Del, Deletion; Conv, conversion; 656g, "intron 2" nt 656 A/C→G; Δ8nt, G110Δ8nt. Some studies did not distinguish between deletions and large conversions, these are denoted by a single number set between these two columns.

<sup>c</sup> Rarely occurring gene conversions including I236N/V237E/M239K and F3061nt. ? denotes alleles that are ambiguous due to lack of parental genotyping information; in these cases, homozygosity and hemizygoty (other chromosome carries a deletion) for a mutation cannot be distinguished.

<sup>d</sup> Includes alleles carrying other mutations listed in Table 4 that do not represent gene conversions, and alleles where no mutation was identified with the methods used in that particular study.

450–461), these deletions have been detected by genomic blot hybridization as absence (or diminished intensity in heterozygotes) of gene-specific fragments produced by digestion with several restriction enzymes (Fig. 14). Large gene conversions, in which multiple mutations are transferred from *CYP21P* to *CYP21*, are also detected by this approach when gene-specific restriction endonuclease sites are affected. Large conversions account for approximately 10% of alleles in classic 21-hydroxylase deficiency (Table 5).

It is now well appreciated that reliable differentiation of deletions and large gene conversions requires analysis of several different restriction digests (typically using the enzymes *Taq* I and *Bgl* II) in which the sites used to distinguish *CYP21P* and *CYP21* are widely spaced (410, 454, 457). This is required because the remaining *CYP21*-like gene on a chromosome with a deletion consists of the 3'-end of *CYP21* "spliced" onto the 5'-end of *CYP21P*, so that the missing fragment in each restriction digest does not necessarily correspond in size to the *CYP21*-specific fragment in normal chromosomes. In fact, deletions of *CYP21* and *CYP21P* are indistinguishable in certain restriction digests (e.g., *Bgl* II, see Fig. 14). On the other hand, transfers of polymorphic restriction sites from *CYP21P* to *CYP21* by gene conversion can also be difficult to distinguish from actual deletions of *CYP21* in single restriction digests (e.g., *Taq* I).

Moreover, deletion or duplication of *C4A* and *CYP21P* (which, as mentioned, occurs frequently) can be very confusing when a *C4B-CYP21* deletion or a large *CYP21* gene conversion is present on the other chromosome. Thus, DNA

from both parents should be examined whenever possible to confirm segregation of putative deletions or gene conversions. Reprobing the same blots with a probe for *C4* is a useful measure to confirm deletions (410, 447, 452).

Deletions have also been directly documented by resolving very large restriction fragments using pulsed field gradient electrophoresis (448, 462, 463) and by high resolution fluorescent *in situ* hybridization (464).

In practice, genomic blot hybridizations are no longer routinely used for molecular diagnosis because they are more laborious and less informative than PCR-based techniques. However, PCR is unable to distinguish deletions from large gene conversions (see Section VI.H).

2. *Nonsense and frameshift mutations.* Two other mutations normally found in *CYP21P* completely prevent synthesis of an intact enzyme and cause salt wasting 21-hydroxylase deficiency if they occur in *CYP21*: the nonsense mutation in codon 318 (Q318X) (416) and the 8-nt deletion in exon 3 (413). The 1-nt insertion in exon 7 of *CYP21P* has generally not been identified as an independent mutation in patients with 21-hydroxylase deficiency.

3. *A or C→G mutation in intron 2.* The nucleotide 13 bp before the end of intron 2 (nt 656) is A or C in normal individuals. Mutation to G constitutes the single most frequent allele causing classic 21-hydroxylase deficiency.

This mutation causes aberrant splicing of intron 2 with retention of 19 nucleotides normally spliced out of mRNA,

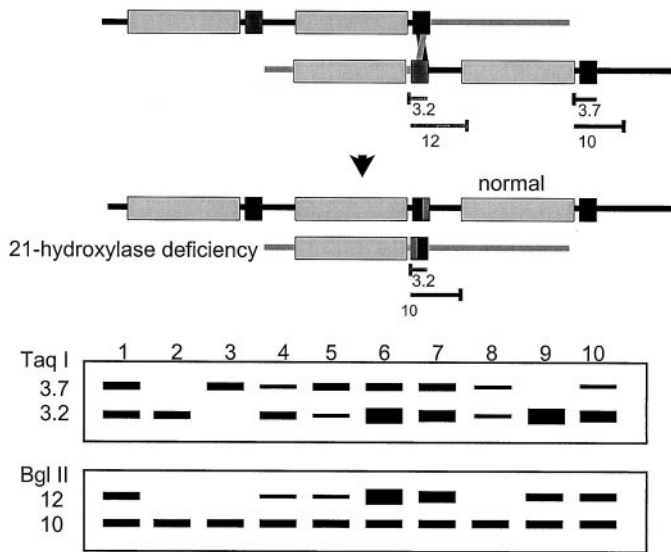

FIG. 14. *Top*, An unequal cross-over generating a *CYP21* deletion. For clarity, only the two *C4* and two *CYP21* genes are shown on each chromosome. When these are misaligned during meiosis, a cross-over can generate two daughter chromosomes, one with three copies of the *C4-CYP21* tandem and the other with one copy. The latter is often a 21-hydroxylase deficiency allele. *Bars below* the genes denote representative restriction fragments that hybridize with *CYP21* cDNA probes (*Taq* I fragments on *top*, *Bgl* II fragments *below*); numbers denote size in kilobases. The vertical line at one end of each bar represents the gene-specific restriction site associated with that fragment (the site at the other end of each fragment is located identically in *CYP21* and *CYP21P*). Note that the fragments associated with the remaining gene on a chromosome with a deletion may be the same size as those normally associated with either *CYP21* or *CYP21P* depending on the location of the gene-specific restriction sites. *Bottom*, Schematic illustration of results of genomic (Southern) blot hybridization from individuals carrying various rearrangements in the *CYP21* genes. Digests with restriction enzymes *Taq* I and *Bgl* II are shown; fragment sizes are in kilobases. Thickness of bands is meant to correspond to fragment intensity on an autoradiogram of an actual experiment. 1, Normal; 2, homozygous for *CYP21* deletion; 3, homozygous for *CYP21P* deletion; 4, heterozygous for *CYP21* or *CYP21P* deletion; 5, heterozygous for *CYP21P* deletion; 6, homozygous for *CYP21P* duplication; 7, heterozygous for *CYP21P* duplication; 8, compound heterozygous for *CYP21* and *CYP21P* deletions; 9, homozygous for gene conversion involving the *Taq* I site in *CYP21*; 10, heterozygous for gene conversion involving the *Taq* I site in *CYP21*. Note that lanes 2 and 9 (*CYP21* deletion and gene conversion) appear identical in the *Taq* I but not the *Bgl* II digest, whereas lanes 2 and 3 (*CYP21* and *CYP21P* deletions) can be distinguished only in the *Taq* I digest. [adapted from data in Ref. 410.]

resulting in a shift in the translational reading frame (414, 418). Almost all of the mRNA is aberrantly spliced, but in cultured cells a small amount of normally spliced mRNA is detected. If no other mutations were present, a small amount of normal enzyme might thus be synthesized.

Although it is not known what proportion of mRNA is normally spliced in the adrenal glands of patients with this mutation, most (but not all) patients who are homozygous or hemizygous for this mutation have the salt wasting form of the disorder, indicating that they have insufficient enzymatic activity to permit adequate aldosterone synthesis. Occasionally, presentation of salt wasting signs is delayed until several months of age in patients carrying this mutation (465). Putative asymptomatic nt 656g homozygotes have been re-

ported but in fact represent PCR typing artifacts (see *Section VI.1.3*)(466).

4. *Pro-30*→*Leu* (*P30L*). This mutation yields an enzyme with 30–60% of normal activity when expressed in cultured cells (438). However, enzymatic activity is rapidly lost when the cells are lysed, suggesting that the enzyme is relatively unstable. Patients carrying this mutation tend to have more severe signs of androgen excess than patients carrying the more common nonclassic mutation V281L (420, 438). This mutation is found in approximately one-sixth of alleles in patients with nonclassic disease, but it may comprise a higher percentage of such alleles in Japan (467).

As is the case with other microsomal P450 enzymes, *CYP21* is targeted and anchored to the membrane of the endoplasmic reticulum mainly by a hydrophobic “tail” at the amino terminus; this tail is required for enzymatic activity and stability (468, 469). Most P450 enzymes have one or more proline residues separating this tail from the remainder of the polypeptide. These residues are predicted to create a turn in the polypeptide chain, and P30L may abolish this turn. Based on studies in other P450 enzymes, this leads to improper folding of the polypeptide and may interfere with localization in the endoplasmic reticulum (470). Indeed, the P30L mutant of *CYP21* is poorly localized to the endoplasmic reticulum in some (438) but not other (435) studies.

5. *Ile-172*→*Asn* (*I172N*). This mutation, the only one specifically associated with the simple virilizing form of the disease, results in an enzyme with approximately 1% of normal activity (346, 365) with normal substrate affinity ( $K_m$ ) but reduced activity ( $V_{max}$ ) (346, 434). The isoleucine residue normally at this position in the E helix is strongly conserved in many different P450 enzymes, and this region of the protein in other P450s interacts with the membrane of the endoplasmic reticulum (471). Mutation of this hydrophobic residue to a polar residue might disrupt such an interaction, weakening the association of the enzyme with the endoplasmic reticulum, and indeed improper localization to the endoplasmic reticulum has been demonstrated in some (346) but not other (434) studies. Alternatively, the mutation may disrupt an intramolecular hydrophobic interaction stabilizing the secondary structure of the enzyme; the mutant enzyme is abnormally sensitive to protease digestion and doesn’t incorporate heme properly (434).

Because aldosterone is normally secreted at a rate 100–1000 times lower than that of cortisol, it is apparent that 21-hydroxylase activity would have to decrease to very low levels before it became rate-limiting for aldosterone biosynthesis. Apparently, as little as 1% of normal activity allows sufficient aldosterone synthesis to prevent significant salt wasting in most cases (see *Section VI.1*).

6. *Ile-Val-Glu-Met-235–238*→*Asn-Glu-Glu-Lys* (*I235N/V236E/M238K*). This cluster of three missense mutations in the G helix also abolishes enzymatic activity (346, 418). Interference with substrate binding has been suggested (based on sequence conservation with cholesterol side chain cleavage enzyme, another cytochrome P450) (414) but is not supported by molecular modeling of *CYP21* based on the crystal structure of *CYP102*.

7. *Val-281→Leu (V281L)*. V281L occurs in all or nearly all patients with nonclassic 21-hydroxylase deficiency who carry the *HLA* haplotype *B14;DR1*, an association that is presumably due to a founder effect (see *Section VI.J*) (206). In certain populations (such as Jews of Eastern European origin) this is a very common genetic polymorphism with a gene frequency of more than 10% (191, 192); in contrast, direct molecular screening of normal newborns in New Zealand yielded a carrier frequency of 2% (195). Overall, approximately 70% of all nonclassic alleles carry the V281L mutation (210, 334). However, the *HLA-B14,DR1*-associated haplotype (and/or V281L) are less common among nonclassic CAH patients in certain ethnic groups such as Yugoslavs (193) and Japanese (467). This mutation results in an enzyme with 50% of normal activity when 17-OHP is the substrate but only 20% of normal activity for progesterone (346, 357). One study suggested that the mutant enzyme is not normally localized in the endoplasmic reticulum (346), whereas another proposed that heme binding was affected (357). As another possibility, this mutation is located in the relatively well conserved I helix, which contains residues thought to be involved in proton transfer (see above).

8. *Arg-356→Trp (R356W)*. This mutation abolishes enzymatic activity when expressed in mammalian cells (365, 418). It is located in a region of the gene encoding the K helix of the enzyme, which suggests that the mutation affects interactions with the cytochrome P450 reductase, but this has not been demonstrated experimentally (366).

9. *Other mutations*. Mutations that are apparently not gene conversions (*i.e.*, they are not usually found in *CYP21P*) account for 5–10% of 21-hydroxylase deficiency alleles in most populations. The most frequent of these is P453S, which occurs in a number of different populations. This suggests that *CYP21P* may carry P453S as an occasional polymorphism and that this mutation is transferred to *CYP21* in the same way as the other mutations frequently causing 21-hydroxylase deficiency (439, 472, 473).

Novel mutations are easy to detect using automated sequencing technologies in centers with well developed prenatal or neonatal screening programs and thus have been reported at an increased rate over the past few years. Such mutations include W22X (474), P30Q (469), G90V (367, 475), Y97X (476), P105L (436, 473), G187A (367, 475), deletion of E196 (437), G291S (437, 473), G291C (367, 475), W302X (477), R316X (478), R339H (439), R354H (367, 475), R356P, R356Q (these two are independent of the R356W mutation that can be generated as a gene conversion) (366), E380D (479), W405X (480), G424S (481), and R483P (482) and frameshifts at W22 (483), Y47 (484), C168 (485), and R483 (473). Several codons including W22, P30, G291, R356, and R483 have undergone several independent mutations and thus these areas may be "hotspots" for such events. Larger rearrangements include a deletion of 10 nucleotides in exon 8 and a duplication of 16 nucleotides in exon 9 (478). Additional mutations affecting splicing include a mutation of the splice acceptor of intron 1 (474) and the splice donors of introns 2 (478) and 7 (480).

Most of these have been reported on only one chromosome. P30Q (469), G90V and G178A (475), delE196 and G291S

(437), G291C (475), R339H (439), R354H (475), R356P and R356Q (366), and R483P (437) decrease or abolish enzymatic activity, and delE196 and R483P also adversely affect enzyme stability (437); P105L acts synergistically with P453S, with which it is associated in one kindred (436).

Despite an apparently exhaustive search, mutations could be not detected in *CYP21* in one patient with apparent simple virilizing 21-hydroxylase deficiency (486). The patient was homozygous for an *HLA* haplotype shared (on one chromosome) by a second cousin with salt wasting 21-hydroxylase deficiency who carried the 8-bp deletion in exon 3 on his other chromosome. This strongly suggests that the presumed 21-hydroxylase deficiency in the patient is genetically linked to *HLA* and thus to *CYP21*. Trivial explanations aside, this suggests that a site outside the gene may be able to significantly influence its expression (see *Section VI.D.3*).

10. *Normal polymorphisms*. Several normal polymorphisms have been detected in *CYP21* in the course of initial sequencing of cloned genes by several groups (343–345, 365). An extra leucine near the N terminus (this has confused numbering of other mutations in some reports) and D183E also occur in *CYP21P* and presumably represent gene conversions that don't affect activity (418). K102R (345), S268T (345, 357, 487), and N493S (345, 365) do not represent gene conversions.

#### G. *De novo recombinations*

CAH is unusual among genetic diseases in the high proportion of mutant alleles generated by intergenic recombination. Both *de novo* deletions (488, 489) and *de novo* apparent gene conversions (34, 420, 490) have been documented; the latter usually involve the intron 2 nt 656g mutation and comprise approximately 1% of 21-hydroxylase deficiency alleles. In such cases, the proband carries a mutation clearly not inherited from the genetically confirmed parents. As the frequency of 21-hydroxylase deficiency alleles in the general population is approximately 2%, the allele frequency of *de novo* gene conversions in intron 2 in the general population should be approximately  $1 \text{ in } 2 \times 10^4$ .

*De novo* recombinations involving *CYP21* have also been documented by PCR in sperm and leukocytes (491). Unequal crossing-over is detected only in sperm ( $1 \text{ in } 10^5\text{--}10^6$  genomes), confirming that this process takes place only during meiosis. Gene conversions, however, take place at equal frequencies in somatic cells and gametes, suggesting that gene conversions occur mainly in mitosis and that meiotic recombination (*i.e.*, double crossing-over) contributes little, if at all, to this process. The frequency of gene conversions observed by this strategy ( $\sim 1 \text{ in } 10^4$ ) is consistent with the reported rate of *de novo* gene conversions in patients with 21-hydroxylase deficiency.

The high rate of recombinations involving the *CYP21* genes may reflect their location in the major histocompatibility complex, in which a high recombination rate between genes encoding transplantation antigens may increase the diversity of the immune response and be evolutionarily favored. The mechanism by which recombination rates might be increased is not known. It is also not known whether

deletions or gene conversions within *CYP21* and *CYP21P*, or more generally within the 30-kb tandem duplication containing these genes, take place within certain discrete regions, or hotspots. It has been suggested that sequences resembling bacteriophage lambda *chi* sites, which are present at relatively high frequencies within *CYP21/CYP21P*, might promote recombination (415, 492). This hypothesis has not been directly tested, but a recombination between *TNXA* and *TNXB* also occurred near a *chi* site (446).

In addition, both *CYP21* (493) and *CYP21P* (494) have high rates of single nucleotide polymorphisms, particularly in intron 2. The significance of this is uncertain, but it may mean that additional mechanisms other than intergenic recombination generate sequence diversity within the major histocompatibility complex.

#### H. Mutation detection and approaches to prenatal diagnosis

**1. Nonmolecular techniques.** Although it is possible to prenatally diagnose 21-hydroxylase deficiency by measuring 17-OHP levels in amniotic fluid obtained by amniocentesis, this technique cannot be used for pregnancies in which the mother takes dexamethasone to suppress the fetal adrenal (see Section V.G) unless she stops the medication for 5–7 days before the amniocentesis (309, 495).

Because 21-hydroxylase deficiency was known to be closely linked to *HLA*, the first alternative strategy was to *HLA* type the proband (*i.e.*, a living affected child in the same family) and fetal amniocytes using serological techniques (399, 496). If these were identical, the fetus could be diagnosed with 21-hydroxylase deficiency with a high degree of confidence. This technique could not be applied in kindreds in which the proband had died or was otherwise unavailable, and new mutations, *HLA* homozygosity, and rare complex recombinations could confound the diagnosis (496). Moreover, serological *HLA* typing is a complex and expensive technique, and amniocytes must be cultured for several weeks to obtain adequate quantities (497). Nevertheless, it was used until recently in some locales (498).

Initial attempts to use the *CYP21* gene itself for prenatal diagnosis relied solely on genomic blot hybridization using cDNA probes, which were able to detect only deletions and large gene conversions (*i.e.*, ~30% of affected alleles) (305, 499–501). When it was apparent that other gene conversions accounted for most of the remaining alleles, it became feasible to carry out prenatal diagnosis by detection of a limited number of mutations. Several strategies have been used; these are considered in approximate chronological order.

**2. General considerations for molecular diagnosis.** Although it is possible to detect mutations by hybridization to genomic DNA (see below), gene amplification using PCR dramatically improves the sensitivity of these techniques. However, it was initially difficult to use PCR to detect *CYP21* mutations because of the paucity of primers that would amplify *CYP21* without amplifying the highly homologous *CYP21P* pseudogene, which already carries most of the mutations of interest. Eventually PCR conditions were identified that permitted gene-specific amplification of *CYP21* in two segments

(Fig. 13). For each of these segments, the *CYP21*-specific primer includes an 8-bp segment in exon 3 that is deleted in *CYP21P* (502). This strategy fails to amplify *CYP21* if the gene is deleted, but deletions can be detected by conventional Southern blotting. A mutant *CYP21* gene would also not be amplified if it contains a gene conversion including exon 3, but such rearrangements can be detected by a second pair of PCRs encompassing exons 1–6 and 6–10. The *CYP21*-specific primers for these reactions are located in exon 6, in which there is a cluster of 4 nucleotides that are mutated in *CYP21P*.

Conversely, “back conversion” of *CYP21P* to include *CYP21*-specific sequences could lead to spurious amplification of *CYP21P* and false positives. This problem is also minimized by amplification of overlapping segments.

PCR-based diagnosis may be complicated by cross-contamination of samples if rigorous controls are not implemented. Furthermore, failure to amplify one haplotype may result in misdiagnosis (466) (see Section VI.I.3). Examination of flanking microsatellite markers in all family members can minimize these problems.

Finally, it must be kept in mind that a gene conversion may be sufficiently large that it includes several mutations. If only a DNA sample from the patient is analyzed, this is impossible to distinguish from compound heterozygosity for different mutations. Therefore, both parents should also be analyzed whenever possible so as to most reliably determine the phase of different mutations (*i.e.*, whether they lie on the same or opposite alleles). Analysis of parental alleles also permits homozygotes and hemizygotes (*i.e.*, individuals who have a mutation on one chromosome and a deletion on the other) to be distinguished.

**3. Allele-specific oligonucleotide hybridization.** Once *CYP21* cDNA had been cloned, deletions and gene conversions that affected gene-specific restriction sites could be detected by Southern blotting. As previously discussed, these accounted for approximately 25% of alleles in most populations.

Point mutations could be identified by hybridization with allele-specific oligonucleotide (ASO) probes, which are short (typically 19–21 nucleotides) single-stranded DNA segments that are centered on each polymorphic or mutant nucleotide in the gene (Fig. 15). These probes are usually radioactively labeled. Under appropriate hybridization and washing conditions, a single nucleotide mismatch is sufficient to destabilize hybridization between the probe and the gene. Each mutation could thus be tested for by duplicate hybridization with pairs of probes, each corresponding to either the normal or mutant sequence.

This technique was first applied to restriction digests of genomic DNA using either Southern blots (413, 418) or in-gel hybridization (206, 410, 415, 416). This application was at the limits of sensitivity of the technique, and it was not widely applied.

PCR makes this technique much more sensitive (34, 334, 419, 422, 428, 502–508). Amplified DNA is dotted on filters and hybridized with 18 probes corresponding to the normal and mutant sequences for each of the frequently occurring gene conversions. Because many samples can be dotted on a single filter and this process can be automated, this approach is relatively efficient when large numbers of samples are to be an-

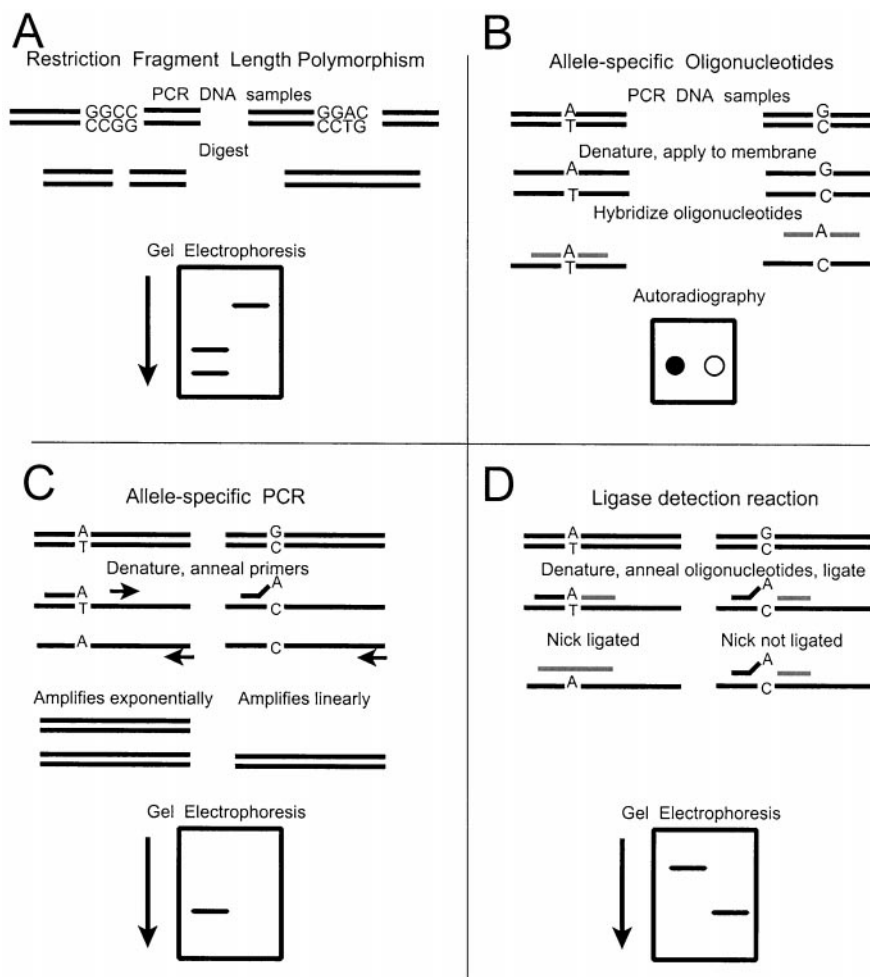

FIG. 15. Commonly employed methods for detecting mutations causing CAH. A, Restriction fragment length polymorphism (RFLP). *Top*, Two otherwise identical double-stranded DNA molecules differ at a single position (*G-C* or *A-T*). The former (*left*) is part of a GGCC sequence that is digested by a restriction endonuclease, whereas the latter (*right*) is part of a GGAC sequence that is not digested. Thus, fragments of different sizes are produced (*center*); these are detected by electrophoresis (*bottom*). B, Allele-specific oligonucleotide hybridization. *Top*, Two otherwise identical double-stranded DNA molecules differ at a single position (*A-T* or *G-C*). These are denatured and hybridized with a labeled single-stranded probe that is complementary to and will hybridize with one of these sequences; this is detected by autoradiography (*bottom*). C, Allele-specific PCR. *Top*, Two otherwise identical double-stranded DNA molecules differ at a single position (*A-T* or *G-C*). They are subjected to PCR using one primer that is complementary to both molecules (*arrow at the right of each molecule*), and a second primer (*short strand ending in A*) that is complementary only to one. Thus, only the molecule on the *left* can be amplified by PCR under these conditions. D, Ligase detection reaction. *Top*, Two otherwise identical double-stranded DNA molecules differ at a single position (*A-T* or *G-C*). They are denatured and annealed with one oligonucleotide that is complementary to both molecules and fluorescently labeled (*gray line at the right of each molecule*), and a second oligonucleotide (*short strand ending in A*) that is complementary only to one. The nick between the two oligonucleotides on the *left* can be ligated, but the nick between oligonucleotides on the *right* cannot, due to the single nucleotide mismatch. Many cycles of denaturation, annealing of oligonucleotides, and ligation can be run. The size difference between ligated and unligated molecules is detected by autoradiography.

alyzed simultaneously. However, 18 independent hybridizations are laborious for small numbers of samples as are typically encountered by laboratories performing prenatal diagnosis. This procedure is also usually performed with radioactively labeled probes, although other labeling techniques are possible. Therefore, several alternative mutation detection strategies have been used. Most require a second round of PCR after relatively long gene-specific segments have been amplified.

4. *Amplification-created restriction sites*. Several mutations causing 21-hydroxylase deficiency (e.g., V281L and Q318X) create or destroy restriction sites and can thus be detected in restriction digests of PCR-amplified DNA by staining agarose gels with ethidium bromide (Fig. 15). Most mutations

that do not involve restriction sites can be detected by locating a PCR primer adjacent to each mutation and changing its sequence to introduce a polymorphic restriction site into the amplified segment (426, 467, 509–513). This technique thus involves a series of second round PCRs and several different restriction digests but does not require radioactivity or specialized equipment. It has been used to screen for mutations in preimplantation embryos in a couple at risk for CAH who were undergoing *in vitro* fertilization (514).

5. *Single-stranded conformation polymorphisms*. If double-stranded DNA is denatured and then quickly returned to native conditions, it will remain in a single-stranded state with a characteristic conformation stabilized by intramolecular hydrogen

bonding. Under these conditions, many mutations change the conformation of the single-stranded segment. This can be detected by a change in the mobility of the segment during PAGE under nondenaturing conditions (478, 515–518). This technique has the theoretical advantage of being able to detect novel mutations that would be missed by allele-specific approaches. However, it becomes insensitive with segments longer than a few hundred nucleotides and thus requires a series of second-round PCRs to cover the entire gene as well as electrophoresis on sequencing gels to resolve the conformation differences. Moreover, typically two rounds of electrophoresis are carried out under different conditions (*e.g.*, with or without glycerol in the gel) to increase the likelihood that most mutations will be detected. Thus, this technique has little to recommend it over available alternatives.

Some of these disadvantages may be minimized by use of a related technique, denaturing gradient gel electrophoresis (519, 520); this technique may be more sensitive but it usually requires specialized electrophoresis apparatus, and it has not been widely used for diagnosis of CAH.

6. *Allele-specific PCR.* A single nucleotide mismatch at the 3'-end of a PCR primer dramatically decreases the efficiency of the reaction. Thus a mutation can be detected by running two alternative reactions. Both use the same primer on one end, but at the other end each reaction uses a primer that corresponds to either the normal or mutant sequence, respectively. Once *CYP21*-specific sequences have been amplified, a second round of 18 allele-specific PCRs (recognizing the normal and mutant sequences at each mutation) will identify the 9 most common mutations (209, 420, 423, 424, 429–432, 480, 521, 522). This technique has similar advantages to the amplification-created restriction site approach; it requires more PCR reactions but doesn't involve restriction digests. Most recent large genotyping studies have used this strategy (Fig. 15).

7. *Ligation detection reaction.* DNA ligase can discriminate point mutations by sequential rounds of linear template-dependent ligation. The ligase will preferentially seal adjacent oligonucleotides hybridized to target DNA in which there is perfect complementarity at the nick junction. A single base mismatch at the nick junction inhibits ligation. Nicks with matches or mismatches can be readily made at a possible mutation site by hybridizing two adjacent oligonucleotides at the desired nucleotide position. Suitably labeling one of these oligonucleotides allows for detection of ligation products, thus permitting sequence discrimination at the single nucleotide level. Ligated and unligated products are easily resolved on a sequencing gel (Fig. 15) (523).

This type of reaction can be readily multiplexed, *i.e.*, all 18 (or more) necessary typing reactions can be run simultaneously in a single tube using PCR-amplified *CYP21* gene segments. Multiplexing is achieved by synthesizing oligonucleotides with synthetic nonhybridizing poly-dA tails such that each ligation product has a unique length. If the oligonucleotides are fluorescently labeled, the entire genotyping can be performed on an automated DNA sequencer. Several different fluorescent labels can also be employed.

This technique has been successfully used for a second

round of neonatal screening after hormonally based primary screening (195).

8. *Oligonucleotide arrays ("DNA chips").* Allele-specific oligonucleotides can be covalently linked to a solid support and hybridized with fluorescently labeled PCR-amplified DNA. The pattern of hybridization is electronically scanned to identify each mutation (524). This technique has been used to demonstrate that *CYP21* is one of the most frequently polymorphic genes in the human genome (493). To our knowledge, it has not yet been applied to routine diagnosis of 21-hydroxylase deficiency, but the potential high throughput of this technique makes it attractive for mass screening applications.

9. *DNA sequencing.* The best way to make certain that novel mutations are not missed is to sequence the entire gene. This can readily be accomplished using automated sequencing methods (473, 525), and computer analysis eliminates the tedium and potential for error in manually reading sequencing gels. This technique is most commonly used after other approaches have failed to identify a mutation on at least one known 21-hydroxylase deficiency allele, but it has been used for some population-based studies (427).

10. *Linked microsatellites.* Despite efforts to increase the ease and accuracy of direct mutation detection, it still requires several PCRs. The interpretation of resulting data is often complex when gene conversions affect the sites recognized by gene-specific primers. Moreover, as discussed below, certain alleles may be preferentially amplified by PCR, leading to errors in typing. Although this strategy is required for research purposes or for confirmation of neonatal screening results, it may not be necessary or even optimal for prenatal diagnosis, especially in countries lacking a centralized laboratory with expertise in this technique. Linkage analysis using highly polymorphic "microsatellite" loci is an alternative or supplementary technique that can be readily performed by most genetics laboratories (431, 466, 526). Microsatellite loci contain several (typically 10–20) dinucleotide (such as CA), trinucleotide (such as CAG), or tetranucleotide tandem repeats. Alleles differ in the number of repeats. PCR using primers flanking the repeated segments yield products of varying lengths that can be measured using manual or automated sequencing gel electrophoresis. For prenatal diagnosis of 21-hydroxylase deficiency, this is conceptually similar to *HLA* typing in its requirement that a sample from an affected child in the same family be compared with the fetal sample, but it may be carried out on DNA from a chorionic villus sample. Typing of at least two flanking microsatellites will yield the most informative and reliable results (195).

### *I. Correlations between genotype and phenotype*

1. *Classification of disease severity.* The classification of 21-hydroxylase deficiency into salt wasting, simple virilizing, and nonclassic types is a useful way to roughly grade the severity of the disease and to predict the therapeutic interventions that will likely be required. If molecular diagnosis could predict this classification, it would increase the utility



of prenatal diagnosis and neonatal screening, and it might serve as a useful diagnostic adjunct to ACTH stimulation tests.

The simplest way to correlate genotype and phenotype is to determine which mutations are characteristically found in each type of 21-hydroxylase deficiency. This is most informative for frequently occurring mutations. Deletions and large conversions are most often found in salt wasting patients, the intron 2 nt 656g mutation is found in both salt wasting and simple virilizing patients, I172N is characteristically seen in simple virilizing patients, and V281L and P30L are found in nonclassic patients (34, 418, 419). This distribution is consistent with the compromise in enzymatic activity conferred by each mutation (see *Section VI.F*).

However, patients are usually compound heterozygotes for different mutations, and so this approach has little predictive value in itself. A useful analytic strategy is to consider that 21-hydroxylase deficiency is a recessive disease, and thus the phenotype of each patient is likely to reflect his or her less severely impaired allele. If mutations are provisionally classified by the degree of enzymatic compromise—severe (also termed “type A”), moderate (type B), or mild (type C)—then one might hypothesize that salt wasting patients would have severe/severe genotypes, simple virilizing patients would have severe/moderate or moderate/moderate genotypes, and nonclassic patients would have severe/mild, moderate/mild or mild/mild genotypes. In one study of 88 families (34), these three predictions were correct in 90%, 67%, and 59% of cases, respectively. The overall correct classification rate was 79%. An expanded follow-up study of the same population (209) yielded even better results, with 177 of 197 patients (88%) being correctly classified in this manner. Similar results were obtained in other studies using the same approach (420, 527).

The salt wasting, simple virilizing, and nonclassic categories are qualitative in nature, and the distinction between simple virilizing and nonclassic disease is necessarily difficult in males in whom signs of androgen excess cannot be detected at birth. Therefore, attempts have been made to correlate genotype with quantitative measures of disease severity such as basal and ACTH-stimulated 17-OHP levels, plasma renin/urinary aldosterone ratios, and Prader genital virilization scores. In general, these are no better correlated with genotype than the broader clinical categories are. There is excellent discrimination between severe and mild genotypes, but a high degree of overlap between moderate genotypes and those either more and less affected (34).

*2. Explanations for discordance of genotype and phenotype.* Several explanations for the less-than-complete correspondence between genotype and phenotype are possible. The most obvious is that the severity of the disease falls on a continuum and patients with disease severity near the borders of the various classifications may easily fall on either side of these borders. Several mutations and genotypes seem to be particularly associated with this problem. First, although the intron 2 nt 656g mutation is classified as severe, it is clearly “leaky” and may yield enough normally spliced mRNA to ameliorate the enzymatic deficiency in some patients. Second, the I172N mutant has marginal enzymatic function (1%

of normal), and this apparently is not always sufficient to prevent salt wasting. These two explanations accounted for 12 of 20 examples of apparent discordance between genotype and phenotype in one study (209), and significant phenotypic variation was noted in a kindred in which all five affected individuals were compound heterozygotes for these two mutations (315). Third, many patients who are discordant for genotype and phenotype are compound heterozygotes for mutations that compromise enzymatic activity to different extents (209, 420); thus it appears that some of these patients actually have *in vivo* enzymatic activities intermediate between those seen in patients who are homozygous for each mutation. Consistent with this idea, presumed compound heterozygotes for a classic and nonclassic allele as a group have higher stimulated 17-OHP levels than presumed homozygotes for nonclassic alleles (36).

Fourth, in studies relying on detection of known mutations, additional novel mutations within *CYP21* might not be detected and might adversely affect activity.

Finally, genetic or environmental factors other than 21-hydroxylase activity may influence phenotype. As discussed in *Section III.E*, the degree of salt wasting tends to improve with time, even in subjects who are genetically predicted to have no 21-hydroxylase activity (84), and genetically identical siblings are occasionally discordant for severity of salt wasting (34, 83); this might reflect expression of additional 21-hydroxylase activities not encoded by *CYP21* (85, 86). Similarly, genetically based variations in androgen biosynthesis or sensitivity to androgens would be expected to influence expression of signs of androgen excess (*Section III.D*).

*3. The problem of allele dropout.* Inaccurate genotyping can obviously confound genotype-phenotype correlations. An important cause of inaccurate genotyping of *CYP21* is unequal PCR amplification of different alleles, sometimes termed “allele dropout.” In particular, nt 656g is sometimes preferentially amplified over the corresponding two normal alleles, 656a and especially 656c, so that heterozygous carriers of nt 656g are typed as homozygotes (466). This led to several reports of high frequencies of asymptomatic homozygotes for this mutation; such individuals were usually obligate heterozygous carriers (such as parents of patients) detected in family studies (514, 528–530). This seemed physiologically possible because this mutation activates a cryptic splice site but allows some amount of normal mRNA to be synthesized (see above). However, the carrier frequencies of nt 656g predicted by these studies were implausibly high. Moreover, the “extra” nt 656g alleles failed to segregate within kindreds (466).

Preferential amplification or allele dropout, in some instances, can be alleviated by altering the PCR amplification conditions such as lowering the KCl concentration (423, 531). In any case, confusion in critical circumstances such as prenatal diagnosis is minimized by genotyping both parents whenever possible and by concomitant use of microsatellite linkage markers (466).

#### *J. Why is CAH so common?*

Classic CAH is a relatively common inherited disease, yet it is potentially lethal if untreated. As death tends to remove

mutant alleles from the population, the question arises as to mechanisms maintaining the carrier frequency at 1–2%. Could there be a selective advantage to heterozygosity, such as exists for sickle cell anemia and resistance to malaria? If so, one would expect to find a carrier frequency for classic CAH that exceeds that predicted from the frequency of individuals with the disease (*i.e.*, a violation of Hardy-Weinberg equilibrium). In New Zealand, the carrier frequency estimated from direct genetic testing of 600 normal newborns—2.8%—indeed exceeds the estimate derived from the frequency of classic CAH observed in newborn screening, 1.3% (195, 223). This difference, however, falls short of statistical significance. Moreover, no mechanism for a heterozygote advantage is immediately apparent.

The observed carrier frequency might be accounted for by a series of founder effects; *i.e.*, a mutation arising in a single ancestor in a particular population is spread through the population via one or more prolific carriers. This is the likely explanation for the high frequency of *CYP21* deletions on the *HLA* haplotype *A3;Bw47;DR7* among Northern Europeans or the *V281L* mutation on the *HLA-B14;DR1* haplotype observed at high frequency in Ashkenazi Jews. As matings between carriers are relatively infrequent at the observed carrier frequencies, there may have been insufficient time for these mutations to be selected against, a phenomenon termed “genetic drift” (532).

New mutations may replace mutant alleles lost through death of affected individuals. As discussed in *Section VI.G*, the incidence of *de novo* gene conversions is estimated to be approximately 1 in  $1 \times 10^{-4}$  (491), similar to the incidence of CAH itself, suggesting that the rates of new mutation and loss from selection may indeed balance.

A selective advantage to the carrier state might arise indirectly due to the position of *CYP21* within the major histocompatibility complex. There seem to be selective advantages to heterozygosity for *HLA* antigens as regards disease resistance (533, 534), and this might select for heterozygosity for *CYP21* mutations when these are in genetic linkage disequilibrium with particular *HLA* antigens. It has also been speculated (535) that gametes carrying particular *HLA* haplotypes might be preferentially inherited—a phenomenon termed “transmission ratio distortion”—but although this is well documented in mice (536), it has not been consistently observed in the human *HLA* complex.

As discussed in *Section III.J*, nonclassic CAH is very frequent in some populations despite putative deleterious effects on fertility, leading to analogous questions about a heterozygote advantage for this form of 21-hydroxylase deficiency (191). However, the actual prevalence of infertility in this disorder is difficult to determine due to the problem of ascertainment bias. It has been speculated that there could be a selective immunological advantage for individuals carrying the nonclassic *CYP21* defect who have slightly higher cortisol levels after cosyntropin stimulation than controls. There is no evidence, however, that the response to pharmacological doses of cosyntropin has any physiological relevance to immunological function (537, 538). Obviously, the alternative explanations of founder effect, genetic drift, and a high frequency of *de novo* mutations all apply equally to classic and nonclassic CAH.

In summary, several explanations account for the observed frequency of mutant *CYP21* alleles in the general population. Although the initial report of an increased carrier frequency of mutant *CYP21* alleles (195) needs to be extended and confirmed, it is unlikely that a direct selective advantage for heterozygosity can be demonstrated.

## VII. Summary

More than 90% of cases of virilizing CAH (the inherited inability to synthesize cortisol) are caused by 21-hydroxylase deficiency. Females with severe, classic 21-hydroxylase deficiency are exposed to excess androgens prenatally and are born with virilized external genitalia. Approximately three-quarters of patients cannot synthesize sufficient aldosterone to maintain sodium balance and may develop potentially fatal salt wasting crises if not treated. In the mild nonclassic form of the disorder, affected females have little or no virilization at birth, but either sex may develop signs of androgen excess postnatally. The disease is caused by mutations in the *CYP21* gene encoding the steroid 21-hydroxylase enzyme. More than 90% of these mutations result from intergenic recombinations between *CYP21* and the closely linked *CYP21P* pseudogene. Approximately 20% of these are gene deletions caused by unequal crossing over during meiosis, whereas the remainder represent transfers to *CYP21* of deleterious mutations normally present in *CYP21P*, a process termed “gene conversion” that apparently takes place during mitosis. The degree to which each mutation compromises enzymatic activity is strongly but not completely correlated with the clinical severity of the disease in patients carrying it. Prenatal diagnosis by direct mutation detection permits prenatal treatment of affected females to minimize genital virilization. Neonatal screening by hormonal methods identifies affected children before salt wasting crises develop, reducing mortality from this condition. Glucocorticoid and mineralocorticoid replacement are the mainstays of treatment, but more rational dosing and additional therapies are being developed.

## References

1. **Bongiovanni AM, Root AM** 1963 The adrenogenital syndrome. *N Engl J Med* 268:1283–1289
2. **White PC, New MI, Dupont B** 1984 HLA-linked congenital adrenal hyperplasia results from a defective gene encoding a cytochrome P-450 specific for steroid 21-hydroxylation. *Proc Natl Acad Sci USA* 81:7505–7509
3. **White PC, New MI, Dupont B** 1987 Congenital adrenal hyperplasia (1). *N Engl J Med* 316:1519–1524
4. **White PC, New MI, Dupont B** 1987 Congenital adrenal hyperplasia (2). *N Engl J Med* 316:1580–1586
5. **Morel Y, Miller WL** 1991 Clinical and molecular genetics of congenital adrenal hyperplasia due to 21-hydroxylase deficiency. *Adv Hum Genet* 20:1–68
6. **Stocco DM, Clark BJ** 1996 Regulation of the acute production of steroids in steroidogenic cells. *Endocr Rev* 17:221–244
7. **Arakane F, Kallen CB, Watari H, Foster JA, Sepuri NB, Pain D, Stayrook SE, Lewis M, Gerton GL, Strauss JF** 1998 The mechanism of action of steroidogenic acute regulatory protein (StAR). StAR acts on the outside of mitochondria to stimulate steroidogenesis. *J Biol Chem* 273:16339–16345
8. **Papadopoulos V** 1998 Structure and function of the peripheral-

- type benzodiazepine receptor in steroidogenic cells. *Proc Soc Exp Biol Med* 217:130–142
9. **White PC** 1994 Genetic diseases of steroid metabolism. *Vitam Horm* 49:131–195
  10. **Nebert DW, Nelson DR, Coon MJ, Estabrook RW, Feyereisen R, Fujii-Kuriyama Y, Gonzalez FJ, Guengerich FP, Gunsalus IC, Johnson EF, Loper JC, Sato R, Waterman MR, Waxman DJ** 1991 The P450 superfamily: update on new sequences, gene mapping, and recommended nomenclature [published erratum appears in *DNA Cell Biol* 1991 Jun; 10(5):397–8]. *DNA Cell Biol* 10:1–14
  11. **Cherradi N, Rossier MF, Vallotton MB, Timberg R, Friedberg J, Orly J, Wang XJ, Stocco DM, Capponi AM** 1997 Submitochondrial distribution of three key steroidogenic proteins (steroidogenic acute regulatory protein and cytochrome p450 scc and  $\beta$ -hydroxysteroid dehydrogenase isomerase enzymes) upon stimulation by intracellular calcium in adrenal glomerulosa cells. *J Biol Chem* 272:7899–7907
  12. **Rheume E, Lachance Y, Zhao HF, Breton N, de Launoit Y, Trudel C, Luu-The V, Simard J, Labrie F** 1991 Structure and expression of a new cDNA encoding the almost exclusive  $\beta$ -hydroxysteroid dehydrogenase/ $\delta$ 5- $\delta$ 4 isomerase in human adrenals and gonads. *Mol Endocrinol* 5:1147–1157
  13. **White PC, Curnow KM, Pascoe L** 1994 Disorders of steroid 11 $\beta$  hydroxylase isozymes. *Endocr Rev* 15:421–438
  14. **Yanase T, Simpson ER, Waterman MR** 1991 17 $\alpha$ -Hydroxylase/17,20-lyase deficiency: from clinical investigation to molecular definition. *Endocr Rev* 12:91–108
  15. **Penning TM** 1997 Molecular endocrinology of hydroxysteroid dehydrogenases. *Endocr Rev* 18:281–305
  16. **Simpson ER, Mahendroo MS, Means GD, Kilgore MW, Hinshelwood MM, Graham-Lorence S, Amarneh B, Ito Y, Fisher CR, Michael MD, Mendelson CR, Bulun SE** 1994 Aromatase cytochrome P450, the enzyme responsible for estrogen biosynthesis. *Endocr Rev* 15:342–355
  17. **Wilson JD, Griffin JE, Russell DW** 1993 Steroid 5 $\alpha$ -reductase 2 deficiency. *Endocr Rev* 14:577–593
  18. **Bertagna X** 1994 Proopiomelanocortin-derived peptides. *Endocrinol Metab Clin North Am* 23:467–485
  19. **Mountjoy KG, Robbins LS, Mortrud MT, Cone RD** 1992 The cloning of a family of genes that encode the melanocortin receptors. *Science* 257:1248–1251
  20. **Waterman MR, Bischof LJ** 1997 Cytochromes P450 12: diversity of ACTH (cAMP)-dependent transcription of bovine steroid hydroxylase genes. *FASEB J* 11:419–427
  21. **Orth DN** 1995 Cushing's syndrome [published erratum appears in *N Engl J Med* 1995 Jun 1;332(22):1527]. *N Engl J Med* 332:791–803
  22. **Itoi K, Seasholtz AF, Watson SJ** 1998 Cellular and extracellular regulatory mechanisms of hypothalamic corticotropin-releasing hormone neurons. *Endocr J* 45:13–33
  23. **Scott LV, Dinan TG** 1998 Vasopressin and the regulation of hypothalamic-pituitary-adrenal axis function: implications for the pathophysiology of depression. *Life Sci* 62:1985–1998
  24. **Nussdorfer GG, Malendowicz LK** 1998 Role of VIP, PACAP, and related peptides in the regulation of the hypothalamo-pituitary-adrenal axis. *Peptides* 19:1443–1467
  25. **Evans RM, Arriza JL** 1989 A molecular framework for the actions of glucocorticoid hormones in the nervous system. *Neuron* 2:1105–1112
  26. **Carsia RV, Malamed S** 1983 Glucocorticoid control of steroidogenesis in isolated rat adrenocortical cells. *Biochim Biophys Acta* 763:83–89
  27. **Reincke M, Beuschlein F, Menig G, Hofmockel G, Arlt W, Lehmann R, Karl M, Allolio B** 1998 Localization and expression of adrenocorticotrophic hormone receptor mRNA in normal and neoplastic human adrenal cortex. *J Endocrinol* 156:415–423
  28. **Rainey WE, White PC** 1998 Functional adrenal zonation and regulation of aldosterone biosynthesis. *Curr Opin Endocrinol Diab* 5:175–182
  29. **Matsusaka T, Ichikawa I** 1997 Biological functions of angiotensin and its receptors. *Annu Rev Physiol* 59:395–412
  30. **Barrett PQ, Bollag WB, Isales CM, McCarthy RT, Rasmussen H** 1989 Role of calcium in angiotensin II-mediated aldosterone secretion. *Endocr Rev* 10:496–518
  31. **de Peretti E, Forest MG** 1982 Pitfalls in the etiological diagnosis of congenital adrenal hyperplasia in the early neonatal period. *Horm Res* 16:10–22
  32. **Cara JF, Moshang T, Bongiovanni AM, Marx BS** 1985 Elevated 17 hydroxyprogesterone and testosterone in a newborn with 3 beta hydroxysteroid dehydrogenase deficiency. *N Engl J Med* 313:618–621
  33. **Frank GR, Yoon DY, Kreitzer PM** 1997 Near-fatal misdiagnosis of congenital adrenal hyperplasia. *J Pediatr* 131:165–166
  34. **Speiser PW, Dupont J, Zhu D, Serrat J, Buegeleisen M, Tusie-Luna MT, Lesser M, New MI, White PC** 1992 Disease expression and molecular genotype in congenital adrenal hyperplasia due to 21-hydroxylase deficiency. *J Clin Invest* 90:584–595
  35. **New MI, Lorenzen F, Lerner AJ, Kohn B, Oberfield SE, Pollack MS, Dupont B, Stoner E, Levy DJ, Pang S, Levine LS** 1983 Genotyping steroid 21-hydroxylase deficiency: hormonal reference data. *J Clin Endocrinol Metab* 57:320–326
  36. **Speiser PW, New MI** 1987 Genotype and hormonal phenotype in nonclassical 21-hydroxylase deficiency. *J Clin Endocrinol Metab* 64:86–91
  37. **Witchel SF, Lee PA** 1998 Identification of heterozygotic carriers of 21-hydroxylase deficiency: sensitivity of ACTH stimulation tests. *Am J Med Genet* 76:337–342
  38. **Lejeune-Lenain C, Cantraine F, Dufresnes M, Prevot F, Wolter R, Franckson JR** 1980 An improved method for the detection of heterozygosity of congenital virilizing adrenal hyperplasia. *Clin Endocrinol (Oxf)* 12:525–535
  39. **Gourmelen M, Gueux B, Pham HTM, Fiet J, Raux-Demay MC, Girard F** 1987 Detection of heterozygous carriers for 21-hydroxylase deficiency by plasma 21-deoxycortisol measurement. *Acta Endocrinol (Copenh)* 116:507–512
  40. **Fiet J, Gueux B, Gourmelen M, Kuttent F, Vexiau P, Couillin P, Pham HTM, Villette JM, Raux-Demay MC, Galons H** 1988 Comparison of basal and adrenocorticotropin-stimulated plasma 21-deoxycortisol and 17-hydroxyprogesterone values as biological markers of late-onset adrenal hyperplasia. *J Clin Endocrinol Metab* 66:659–667
  41. **Fiet J, Villette JM, Galons H, Boudou P, Burthier JM, Hardy N, Soliman Julien R, Vexiau P, Gourmelen M** 1994 The application of a new highly-sensitive radioimmunoassay for plasma 21-deoxycortisol to the detection of steroid-21-hydroxylase deficiency. *Ann Clin Biochem* 31:56–64
  42. **Swain A, Narvaez V, Burgoyne P, Camerino G, Lovell-Badge R** 1998 Dax1 antagonizes Sry action in mammalian sex determination. *Nature* 391:761–767
  43. **Parker KL, Schedl A, Schimmer BP** 1999 Gene interactions in gonadal development. *Annu Rev Physiol* 61:417–433
  44. **Vainio S, Heikkila M, Kispert A, Chin N, McMahon AP** 1999 Female development in mammals is regulated by Wnt-4 signaling. *Nature* 397:405–409
  45. **Lee MM, Donahoe PK** 1993 Mullerian inhibiting substance: a gonadal hormone with multiple functions. *Endocr Rev* 14:152–164
  46. **Quigley CA, De Bellis A, Marschke KB, el-Awady MK, Wilson EM, French FS** 1995 Androgen receptor defects: historical, clinical, and molecular perspectives [published erratum appears in *Endocr Rev* 1995 Aug;16(4):546]. *Endocr Rev* 16:271–321
  47. **Villee DB** 1972 The development of steroidogenesis. *Am J Med* 53:533–544
  48. **Siiteri PK, MacDonald PC** 1966 Placental estrogen biosynthesis during human pregnancy. *J Clin Endocrinol Metab* 26:751–761
  49. **Mesiano S, Jaffe RB** 1997 Developmental and functional biology of the primate fetal adrenal cortex. *Endocr Rev* 18:378–403
  50. **Parker KL, Schimmer BP** 1997 Steroidogenic factor 1: a key determinant of endocrine development and function. *Endocr Rev* 18:361–377
  51. **Muscattelli F, Strom TM, Walker AP, Zanaria E, Recan D, Meindl A, Bardoni B, Guioli S, Zehetner G, Rabl W** 1994 Mutations in the DAX-1 gene give rise to both X-linked adrenal hypoplasia congenita and hypogonadotropic hypogonadism. *Nature* 372:672–676
  52. **Bocian-Sobkowska J, Malendowicz LK, Wozniak W** 1997 Comparative stereological study on zonation and cellular composition of adrenal glands of normal and anencephalic human fetuses. I. Zonation of the gland. *Histol Histopathol* 12:311–317

53. Ehrhart-Bornstein M, Hinson JP, Bornstein SR, Scherbaum WA, Vinson GP 1998 Intraadrenal interactions in the regulation of adrenocortical steroidogenesis [published erratum appears in *Endocr Rev* 1998 Jun;19(3):301]. *Endocr Rev* 19:101-143
54. Bryan PJ, Caldamone AA, Morrison SC, Yulish BS, Owens R 1988 Ultrasound findings in the adreno-genital syndrome (congenital adrenal hyperplasia). *J Ultrasound Med* 7:675-679
55. Al-Alwan I, Navarro O, Daneman D, Daneman A 1999 Clinical utility of adrenal ultrasonography in the diagnosis of congenital adrenal hyperplasia. *J Pediatr* 135:71-75
56. Reiter EO, Fuldauer VG, Root AW 1977 Secretion of the adrenal androgen, dehydroepiandrosterone sulfate, during normal infancy, childhood, and adolescence, in sick infants, and in children with endocrinologic abnormalities. *J Pediatr* 90:766-770
57. Sklar CA, Kaplan SL, Grumbach MM 1980 Evidence for dissociation between adrenarche and gonadarche: studies in patients with idiopathic precocious puberty, gonadal dysgenesis, isolated gonadotropin deficiency, and constitutionally delayed growth and adolescence. *J Clin Endocrinol Metab* 51:548-556
58. Kohn B, Levine LS, Pollack MS, Pang S, Lorenzen F, Levy D, Lerner AJ, Rondonini GF, Dupont B, New MI 1982 Late-onset steroid 21-hydroxylase deficiency: a variant of classical congenital adrenal hyperplasia. *J Clin Endocrinol Metab* 55:817-827
59. Sellers EP, MacGillivray MH 1995 Blunted adrenarche in patients with classical congenital adrenal hyperplasia due to 21-hydroxylase deficiency. *Endocr Res* 21:537-544
60. Brunelli VL, Chiumello G, David M, Forest MG 1995 Adrenarche does not occur in treated patients with congenital adrenal hyperplasia resulting from 21-hydroxylase deficiency. *Clin Endocrinol (Oxf)* 42:461-466
61. Jost A 1970 Hormonal factors in the sex differentiation of the mammalian foetus. *Philos Trans R Soc Lond B Biol Sci* 259:119-130
62. Winters JL, Chapman PH, Powell DE, Banks ER, Allen WR, Wood DPJ 1996 Female pseudohermaphroditism due to congenital adrenal hyperplasia complicated by adenocarcinoma of the prostate and clear cell carcinoma of the endometrium. *Am J Clin Pathol* 106:660-664
63. Grumbach MM, Ducharme JR 1960 The effects of androgens on fetal sexual development. Androgen-induced female pseudohermaphroditism. *Fertil Steril* 11:157
64. Prader A 1954 Der genitalbefund beim pseudohermaphroditismus femininus der kengenitalen adrenogenitalen syndroms. *Helv Paediatr Acta* 9:231-248
65. Choong CS, Kempainen JA, Zhou ZX, Wilson EM 1996 Reduced androgen receptor gene expression with first exon CAG repeat expansion. *Mol Endocrinol* 10:1527-1535
66. Chamberlain NL, Driver ED, Miesfeld RL 1994 The length and location of CAG trinucleotide repeats in the androgen receptor N-terminal domain affect transactivation function. *Nucl Acids Res* 22:3181-3186
67. Jaaskelainen J, Voutilainen R 1997 Growth of patients with 21 hydroxylase deficiency: an analysis of the factors influencing adult height. *Pediatr Res* 41:3033
68. Belgorosky A, Chahin S, Rivarola MA 1996 Elevation of serum luteinizing hormone levels during hydrocortisone treatment in infant girls with 21-hydroxylase deficiency. *Acta Paediatr* 85:1172-1175
69. Barnes RB, Rosenfield RL, Ehrmann DA, Cara JF, Cuttler L, Levitsky LL, Rosenthal IM 1994 Ovarian hyperandrogenism as a result of congenital adrenal virilizing disorders: evidence for perinatal masculinization of neuroendocrine function in women. *J Clin Endocrinol Metab* 79:1328-1333
70. Funder JW 1993 Aldosterone action. *Annu Rev Physiol* 55:115-130
71. Lamberts SW, Bruining HA, de Jong FH 1997 Corticosteroid therapy in severe illness. *N Engl J Med* 337:1285-1292
72. Globerman H, Rosler A, Theodor R, New MI, White PC 1988 An inherited defect in aldosterone biosynthesis caused by a mutation in or near the gene for steroid 11-hydroxylase. *N Engl J Med* 319:1193-1197
73. Berger S, Cole TJ, Schmid W, Schutz G 1996 Analysis of glucocorticoid and mineralocorticoid signalling by gene targeting. *Endocr Res* 22:641-652
74. Bornstein SR, Tajima T, Eisenhofer G, Haidan A, Aguilera G 1999 Adrenomedullary function is severely impaired in 21-hydroxylase-deficient mice. *FASEB J* 13:1185-1194
75. Kuhnle U, Land M, Ulick S 1986 Evidence for the secretion of an antiminerlocorticoid in congenital adrenal hyperplasia. *J Clin Endocrinol Metab* 62:934-940
76. Wambach G, Higgins JR 1978 Antiminerlocorticoid action of progesterone in the rat: correlation of the effect on electrolyte excretion and interaction with renal mineralocorticoid receptors. *Endocrinology* 102:1686-1693
77. Losert W, Casals-Stenzel J, Buse M 1985 Progestogens with antiminerlocorticoid activity. *Arzneimittelforschung* 35:459-471
78. Rafestin-Oblin ME, Couette B, Barlet-Bas C, Cheval L, Viger A, Doucet A 1991 Renal action of progesterone and 18-substituted derivatives. *Am J Physiol* 260:F828-F832
79. Oelkers WK 1996 Effects of estrogens and progestogens on the renin-aldosterone system and blood pressure. *Steroids* 61:166-171
80. Whitehead FJ, Couper RT, Moore L, Bourne AJ, Byard RW 1996 Dehydration deaths in infants and young children. *Am J Forensic Med Pathol* 17:73-78
81. Pang SY, Wallace MA, Hofman L, Thuline HC, Dorche C, Lyon IC, Dobbins RH, Kling S, Fujieda K, Suwa S 1988 Worldwide experience in newborn screening for classical congenital adrenal hyperplasia due to 21-hydroxylase deficiency. *Pediatrics* 81:866-874
82. Rebuffat P, Mazzocchi G, Gottardo G, Meneghelli V, Nussdorfer GG 1988 Further investigations on the atrial natriuretic factor (ANF)-induced inhibition of the growth and steroidogenic capacity of rat adrenal zona glomerulosa *in vivo*. *J Steroid Biochem* 29:605-609
83. Stoner E, Dimartino-Nardi J, Kuhnle U, Levine LS, Oberfield SE, New MI 1986 Is salt-wasting in congenital adrenal hyperplasia due to the same gene as the fasciculata defect? *Clin Endocrinol (Oxf)* 24:9-20
84. Speiser PW, Agdere L, Ueshiba H, White PC, New MI 1991 Aldosterone synthesis in salt-wasting congenital adrenal hyperplasia with complete absence of adrenal 21-hydroxylase. *N Engl J Med* 324:145-149
85. Winkel CA, Casey ML, Worley RJ, Madden JD, Mac Donald PC 1983 Extraadrenal steroid 21-hydroxylase activity in a woman with congenital adrenal hyperplasia due to steroid 21-hydroxylase deficiency. *J Clin Endocrinol Metab* 56:104-107
86. Mellon SH, Miller WL 1989 Extraadrenal steroid 21-hydroxylation is not mediated by P450c21. *J Clin Invest* 84:1497-1502
87. Lajic S, Eidsmo L, Holst M 1995 Steroid 21-hydroxylase in the kidney: demonstration of levels of messenger RNA which correlate with the level of activity. *J Steroid Biochem Mol Biol* 52:181-186
88. Zhou Z, Agarwal VR, Dixit N, White PC, Speiser PW 1997 Steroid 21-hydroxylase expression and activity in human lymphocytes. *Mol Cell Endocrinol* 127:11-18
89. Zhou Z, Shackleton CH, Pahwa S, White PC, Speiser PW 1998 Prominent sex steroid metabolism in human lymphocytes. *Mol Cell Endocrinol* 138:61-69
90. Tukey RH, Okino S, Barnes H, Griffin KJ, Johnson EF 1985 Multiple gene-like sequences related to the rabbit hepatic progesterone 21-hydroxylase cytochrome P-450 1. *J Biol Chem* 260:13347-13354
91. Thilen A, Woods KA, Perry LA, Savage MO, Wedell A, Ritzen EM 1995 Early growth is not increased in untreated moderately severe 21-hydroxylase deficiency. *Acta Paediatr* 84:894-898
92. Legro RS, Shahbahrami B, Lobo RA, Kovacs BW 1994 Size polymorphisms of the androgen receptor among female Hispanics and correlation with androgenic characteristics. *Obstet Gynecol* 83:701-706
93. Klingensmith GJ, Garcia SC, Jones HW, Migeon CJ, Blizzard RM 1977 Glucocorticoid treatment of girls with congenital adrenal hyperplasia: effects on height, sexual maturation, and fertility. *J Pediatr* 90:996-1004
94. New MI, Gertner JM, Speiser PW, del Balzo P 1988 Growth and final height in classical and nonclassical 21-hydroxylase deficiency. *Acta Paediatr Jpn* 30[Suppl]:79-88
95. Young MC, Ribeiro J, Hughes IA 1989 Growth and body proportions in congenital adrenal hyperplasia. *Arch Dis Child* 64:1554-1558

96. David M, Sempe M, Blanc M, Nicolino M, Forest MG, Morel Y 1994 [Final height in 69 patients with congenital adrenal hyperplasia due to 21-hydroxylase deficiency]. [French]. *Arch Pediatr* 1:363–367
97. Lim YJ, Batch JA, Warne GL 1995 Adrenal 21-hydroxylase deficiency in childhood: 25 years' experience. *J Paediatr Child Health* 31:222–227
98. Girgis R, Winter JS 1997 The effects of glucocorticoid replacement therapy on growth, bone mineral density, and bone turnover markers in children with congenital adrenal hyperplasia. *J Clin Endocrinol Metab* 82:3926–3929
99. Hauffa BP, Winter A, Stolecke H 1997 Treatment and disease effects on short-term growth and adult height in children and adolescents with 21-hydroxylase deficiency. *Klin Padiatr* 209:71–77
100. Odell WD, Parker LN 1984 Control of adrenal androgen production. *Endocr Res* 10:617–630
101. Helleday J, Siwers B, Ritzen EM, Carlstrom K 1993 Subnormal androgen and elevated progesterone levels in women treated for congenital virilizing 21-hydroxylase deficiency. *J Clin Endocrinol Metab* 76:933–936
102. London DR 1987 The consequences of hyperandrogenism in young women. *J R Soc Med* 80:741–745
103. Speiser PW, Serrat J, New MI, Gertner JM 1992 Insulin insensitivity in adrenal hyperplasia due to nonclassical steroid 21-hydroxylase deficiency. *J Clin Endocrinol Metab* 75:1421–1424
104. Bonaccorsi AC, Adler I, Figueiredo JG 1987 Male infertility due to congenital adrenal hyperplasia: testicular biopsy findings, hormonal evaluation, and therapeutic results in three patients. *Fertil Steril* 47:664–670
105. Holmes-Walker DJ, Conway GS, Honour JW, Rumsby G, Jacobs HS 1995 Menstrual disturbance and hypersecretion of progesterone in women with congenital adrenal hyperplasia due to 21-hydroxylase deficiency. *Clin Endocrinol (Oxf)* 43:291–296
106. Imperato-McGinley J, Binienda Z, Gedney J, Vaughan Jr ED 1986 Nipple differentiation in fetal male rats treated with an inhibitor of the enzyme 5  $\alpha$ -reductase: definition of a selective role for dihydrotestosterone. *Endocrinology* 118:132–137
107. Pertzalan A, Yalon L, Kauli R, Laron Z 1982 A comparative study of the effect of oestrogen substitution therapy on breast development in girls with hypo and hypergonadotrophic hypogonadism. *Clin Endocrinol (Oxf)* 16:359–368
108. Schwarz HP, Jocham A, Kuhnle U 1995 Rapid occurrence of the-larche and menarche induced by hydrocortisone in a teenage girl with previously untreated congenital adrenal hyperplasia. *Eur J Pediatr* 154:617–620
109. Lo JC, Schwitzgebel VM, Tyrrell JB, Fitzgerald PA, Kaplan SL, Conte FA, Grumbach MM 1999 Normal female infants born of mothers with classic congenital adrenal hyperplasia due to 21-hydroxylase deficiency. *J Clin Endocrinol Metab* 84:930–936
110. Miller WL 1999 Congenital adrenal hyperplasia in the adult patient. *Adv Intern Med* 44:155–173
111. Kerlan V, Nahoul K, Le Martelot MT, Bercovici JP 1994 Longitudinal study of maternal plasma bioavailable testosterone and androstenediol glucuronide levels during pregnancy. *Clin Endocrinol (Oxf)* 40:263–267
112. Dorfman RL 1999 The antiestrogenic and antiandrogenic effects of progesterone in the defense of a normal fetus. *Anat Rec* 157:547–558
113. Urban MD, Lee PA, Migeon CJ 1978 Adult height and fertility in men with congenital virilizing adrenal hyperplasia. *N Engl J Med* 299:1392–1396
114. Prader A, Zachmann M, Illig R 1973 Fertility in adult males with congenital adrenal hyperplasia due to 21-hydroxylase deficiency. *Acta Endocrinol Copenh [Suppl]* 177:57
115. Willi U, Atares M, Prader A, Zachmann M 1991 Testicular adrenal-like tissue (TALT) in congenital adrenal hyperplasia: detection by ultrasonography. *Pediatr Radiol* 21:284–287
116. Rutgers JL, Young RH, Scully RE 1988 The testicular "tumor" of the adrenogenital syndrome. A report of six cases and review of the literature on testicular masses in patients with adrenocortical disorders. *Am J Surg Pathol* 12:503–513
117. Sinfiorani E, Livieri C, Mauri M, Bisio P, Sibilla L, Chiesa L, Martelli A 1994 Cognitive and neuroradiological findings in congenital adrenal hyperplasia. *Psychoneuroendocrinology* 19:55–64
118. Nass R, Baker S 1991 Learning disabilities in children with congenital adrenal hyperplasia. *J Child Neurol* 6:306–312
119. Donaldson MD, Thomas PH, Love JG, Murray GD, McNinch AW, Savage DC 1994 Presentation, acute illness, and learning difficulties in salt wasting 21-hydroxylase deficiency. *Arch Dis Child* 70:214–218
120. Helleday J, Bartfai A, Ritzen EM, Forsman M 1994 General intelligence and cognitive profile in women with congenital adrenal hyperplasia (CAH). *Psychoneuroendocrinology* 19:343–356
121. Resnick SM, Berenbaum SA, Gottesman II, Bouchard TJ 1986 Early hormonal influences on cognitive functioning in congenital adrenal hyperplasia. *Dev Psychol* 22:191–198
122. Nass R, Baker S 1991 Androgen effects on cognition: congenital adrenal hyperplasia. *Psychoneuroendocrinology* 16:189–201
123. Hampson E, Rovet JF, Altmann D 1998 Spatial reasoning in children with congenital adrenal hyperplasia due to 21-hydroxylase deficiency. *Dev Neuropsychol* 14:299–320
124. Nass R, Baker S, Speiser P, Virdis R, Balsamo A, Cacciari E, Loche A, Dumic M, New M 1987 Hormones and handedness: left-hand bias in female congenital adrenal hyperplasia patients. *Neurology* 37:711–715
125. Helleday J, Siwers B, Ritzen EM, Hugdahl K 1994 Normal lateralization for handedness and ear advantage in a verbal dichotic listening task in women with congenital adrenal hyperplasia (CAH). *Neuropsychologia* 32:875–880
126. Nass R, Heier L, Moshang T, Oberfield S, George A, New MI, Speiser PW 1997 Magnetic resonance imaging in the congenital adrenal hyperplasia population: increased frequency of white-matter abnormalities and temporal lobe atrophy. *J Child Neurol* 12:181–186
127. Plante E, Boliek C, Binkiewicz A, Erly WK 1996 Elevated androgen, brain development and language/learning disabilities in children with congenital adrenal hyperplasia. *Dev Med Child Neurol* 38:423–437
128. Ehrhardt AA, Meyer-Bahlburg HF 1981 Effects of prenatal sex hormones on gender-related behavior. *Science* 211:1312–1318
129. Breedlove SM 1994 Sexual differentiation of the human nervous system. *Annu Rev Psychol* 45:389–418
130. Meyer-Bahlburg HF 1999 What causes low rates of child-bearing in congenital adrenal hyperplasia? *J Clin Endocrinol Metab* 84:1844–1847
131. Meyer-Bahlburg HF 1999 Gender assignment and reassignment in 46, XY pseudohermaphroditism and related conditions. *J Clin Endocrinol Metab* 84:3455–3458
132. Wilson JD 1999 The role of androgens in male gender role behavior. *Endocr Rev* 20:726–737
133. Dittmann RW, Kappes MH, Kappes ME, Borger D, Stegner H, Willig RH, Wallis H 1990 Congenital adrenal hyperplasia. I: Gender-related behavior and attitudes in female patients and sisters [published erratum appears in *Psychoneuroendocrinology* 1991; 16(4):369–71]. *Psychoneuroendocrinology* 15:401–420
134. Dittmann RW, Kappes MH, Kappes ME, Borger D, Meyer-Bahlburg HF, Stegner H, Willig RH, Wallis H 1990 Congenital adrenal hyperplasia. II. Gender-related behavior and attitudes in female salt-wasting and simple-virilizing patients. *Psychoneuroendocrinology* 15:421–434
135. Berenbaum SA, Snyder E 1995 Early hormonal influences on childhood sex-typed activity and playmate preferences: implications for the development of sexual orientation. *Dev Psychol* 31:31–42
136. Berenbaum SA 1999 Effects of early androgens on sex-typed activities and interests in adolescents with congenital adrenal hyperplasia. *Horm Behav* 35:102–110
137. Dittmann RW 1992 Body positions and movement patterns in female patients with congenital adrenal hyperplasia. *Horm Behav* 26:441–456
138. Berenbaum SA, Resnick SM 1997 Early androgen effects on aggression in children and adults with congenital adrenal hyperplasia. *Psychoneuroendocrinology* 22:505–515
139. Helleday J, Edman G, Ritzen EM, Siwers B 1993 Personality characteristics and platelet MAO activity in women with congenital adrenal hyperplasia (CAH). *Psychoneuroendocrinology* 18:343–354
140. Gordon AH, Lee PA, Dulcan MK, Finegold DN 1986 Behavioral problems, social competency, and self perception among girls with

- congenital adrenal hyperplasia. *Child Psychiatry Hum Dev* 17: 129–138
141. **Hurtig AL, Rosenthal IM** 1987 Psychological findings in early treated cases of female pseudohermaphroditism caused by virilizing congenital adrenal hyperplasia. *Arch Sex Behav* 16:209–223
  142. **Merke DP, Fields J, Vaituzis AC, Chrousos GP, Giedd JN** Children with classic CAH have decreased amygdala and normal hippocampal volume. Program of the 81st Annual Meeting of The Endocrine Society, San Diego, CA, 1999 (Abstract P2–126)
  143. **Money J, Schwartz M, Lewis VG** 1984 Adult erotosexual status and fetal hormonal masculinization and demasculinization: 46,XX congenital virilizing adrenal hyperplasia and 46,XY androgen-insensitivity syndrome compared. *Psychoneuroendocrinology* 9:405–414
  144. **Dittmann RW, Kappes ME, Kappes MH** 1992 Sexual behavior in adolescent and adult females with congenital adrenal hyperplasia. *Psychoneuroendocrinology* 17:153–170
  145. **Zucker KJ, Bradley SJ, Oliver G, Blake J, Fleming S, Hood J** 1996 Psychosexual development of women with congenital adrenal hyperplasia. *Horm Behav* 30:300–318
  146. **Kuhnle U, Bullinger M** 1997 Outcome of congenital adrenal hyperplasia. *Pediatr Surg Int* 12:511–515
  147. **Bradley SJ, Oliver GD, Chernick AB, Zucker KJ** 1998 Experiment of nurture: ablatio penis at 2 months, sex reassignment at 7 months, and a psychosexual follow-up in young adulthood. *Pediatrics* 102:e9
  148. **Diamond M** 1999 Pediatric management of ambiguous and traumatized genitalia. *J Urol* 162:1–8
  149. **Bosinski HA, Peter M, Bonatz G, Arndt R, Heidenreich M, Sippell WG, Wille R** 1997 A higher rate of hyperandrogenic disorders in female-to-male transsexuals. *Psychoneuroendocrinology* 22:361–380
  150. **Slijper FM, Drop SL, Molenaar JC, de Muinck K** 1998 Long-term psychological evaluation of intersex children. *Arch Sex Behav* 27: 125–144
  151. **Meyer-Bahlburg HF, Gruen RS, New MI, Bell JJ, Morishima A, Shimshi M, Bueno Y, Varga I, Baker SW** 1996 Gender change from female to male in classical congenital adrenal hyperplasia. *Horm Behav* 30:319–332
  152. **Abdullah MA, Katugampola M, al-Habib S, al-Jurayyan N, al-Samarrai A, Al-Nuaim A, Patel PJ, Niazi M** 1991 Ambiguous genitalia: medical, socio-cultural and religious factors affecting management in Saudi Arabia. *Ann Trop Paediatr* 11:343–348
  153. **Chatterjee S, Chatterjee SK** 1992 Congenital adrenal hyperplasia: experience at Calcutta. *Indian Pediatr* 29:1013–1018
  154. **Kandemir N, Yordam N** 1997 Congenital adrenal hyperplasia in Turkey: a review of 273 patients. *Acta Paediatr* 86:22–25
  155. **Hochberg Z, Gardos M, Benderly A** 1987 Psychosexual outcome of assigned females and males with 46,XX virilizing congenital adrenal hyperplasia. *Eur J Pediatr* 146:497–499
  156. **Bernini GP, Brogi G, Vivaldi MS, Argenio GF, Sgro M, Moretti A, Salvetti A** 1996 17-Hydroxyprogesterone response to ACTH in bilateral and monolateral adrenal incidentalomas. *J Endocrinol Invest* 19:745–752
  157. **Beuschlein F, Schulze E, Mora P, Gensheimer HP, Maser-Gluth C, Allolio B, Reincke M** 1998 Steroid 21-hydroxylase mutations and 21-hydroxylase messenger ribonucleic acid expression in human adrenocortical tumors. *J Clin Endocrinol Metab* 83:2585–2588
  158. **Jaresch S, Kornely E, Kley HK, Schlaghecke R** 1992 Adrenal incidentaloma and patients with homozygous or heterozygous congenital adrenal hyperplasia. *J Clin Endocrinol Metab* 74:685–689
  159. **Ravichandran R, Lafferty F, McGinniss MJ, Taylor HC** 1996 Congenital adrenal hyperplasia presenting as massive adrenal incidentalomas in the sixth decade of life: report of two patients with 21-hydroxylase deficiency. *J Clin Endocrinol Metab* 81:1776–1779
  160. **Umpierrez MB, Fackler S, Umpierrez GE, Rubin J** 1997 Adrenal myelolipoma associated with endocrine dysfunction: review of the literature. *Am J Med Sci* 314:338–341
  161. **Pignatelli D, Vendeira P, Cabral AC** 1998 Adrenal incidentalomas: adrenal hemangioma in a patient with congenital adrenal hyperplasia. *South Med J* 91:775–779
  162. **Mokshagundam S, Surks MI** 1993 Congenital adrenal hyperplasia diagnosed in a man during workup for bilateral adrenal masses. *Arch Intern Med* 153:1389–1391
  163. **Norris AM, O'Driscoll JB, Mamtara H** 1996 Macronodular congenital adrenal hyperplasia in an adult with female pseudohermaphroditism. *Eur Radiol* 6:470–472
  164. **Dubey GK, Dotiwalla HH, Choubey BS, Kher A** 1981 A case report of virilising adrenal cortical carcinoma. *J Assoc Physicians India* 29:491–493
  165. **Bauman A, Bauman CG** 1982 Virilizing adrenocortical carcinoma. Development in a patient with salt-losing congenital adrenal hyperplasia. *JAMA* 248:3140–3141
  166. **Lightner ES, Levine LS** 1993 The adrenal incidentaloma. A pediatric perspective. *Am J Dis Child* 147:1274–1276
  167. **Terzolo M, Osella G, Ali A, Borretta G, Magro GP, Termine A, Paccotti P, Angeli A** 1996 Different patterns of steroid secretion in patients with adrenal incidentaloma. *J Clin Endocrinol Metab* 81: 740–744
  168. **Nagasaka S, Kubota K, Motegi T, Hayashi E, Ohta M, Takahashi K, Takahashi T, Iwasaki Y, Koike M, Nishikawa T** 1996 A case of silent 21-hydroxylase deficiency with persistent adrenal insufficiency after removal of an adrenal incidentaloma. *Clin Endocrinol (Oxf)* 44:111–116
  169. **Clark RV, Albertson BD, Munabi A, Cassorla F, Aguilera G, Warren DW, Sherins RJ, Loriaux DL** 1990 Steroidogenic enzyme activities, morphology, and receptor studies of a testicular adrenal rest in a patient with congenital adrenal hyperplasia. *J Clin Endocrinol Metab* 70:1408–1413
  170. **Avila NA, Shawker TS, Jones JV, Cutler Jr GB, Merke DP** 1999 Testicular adrenal rest tissue in congenital adrenal hyperplasia: serial sonographic and clinical findings. *AJR Am J Roentgenol* 172:1235–1238
  171. **Walker BR, Skoog SJ, Winslow BH, Canning DA, Tank ES** 1997 Testis sparing surgery for steroid unresponsive testicular tumors of the adrenogenital syndrome. *J Urol* 157:1460–1463
  172. **Zachmann M, Manella B, Kempken B, Knorr-Muerset G, Atares M, Prader A** 1984 Ovarian steroidogenesis in an adrenalectomized girl with 21-hydroxylase deficiency. *Clin Endocrinol (Oxf)* 21:575–582
  173. **Srikanth MS, West BR, Ishitani M, Isaacs Jr H, Applebaum H, Costin G** 1992 Benign testicular tumors in children with congenital adrenal hyperplasia. *J Pediatr Surg* 27:639–641
  174. **Dieckmann K, Lecomte P, Despert F, Maurage C, Sirinelli D, Rolland JC** 1995 [Congenital adrenal hyperplasia and testicular hypertrophy]. [French]. *Arch Pediatr* 2:1167–1172
  175. **Solish SB, Goldsmith MA, Voutilainen R, Miller WL** 1989 Molecular characterization of a Leydig cell tumor presenting as congenital adrenal hyperplasia. *J Clin Endocrinol Metab* 69:1148–1152
  176. **Blumberg-Tick J, Boudou P, Nahoul K, Schaison G** 1991 Testicular tumors in congenital adrenal hyperplasia: steroid measurements from adrenal and spermatic veins. *J Clin Endocrinol Metab* 73:1129–1133
  177. **Speiser PW, Heier L, Serrat J, New MI, Nass R** 1995 Failure of steroid replacement to consistently normalize pituitary function in congenital adrenal hyperplasia: hormonal and MRI data. *Horm Res* 44:241–246
  178. **Ghizzoni L, Bernasconi S, Viridis R, Vottero A, Ziveri M, Volta C, Iughetti L, Giovannelli G** 1994 Dynamics of 24-hour pulsatile cortisol, 17-hydroxyprogesterone, and androstenedione release in prepubertal patients with nonclassic 21-hydroxylase deficiency and normal prepubertal children. *Metabolism* 43:372–377
  179. **Temeck JW, Pang SY, Nelson C, New MI** 1987 Genetic defects of steroidogenesis in premature pubarche. *J Clin Endocrinol Metab* 64:609–617
  180. **Balducci R, Boscherini B, Mangiantini A, Morellini M, Toscano V** 1994 Isolated precocious pubarche: an approach. *J Clin Endocrinol Metab* 79:582–589
  181. **Marynick SP, Chakmakjian ZH, McCaffree DL, Herndon Jr JH** 1983 Androgen excess in cystic acne. *N Engl J Med* 308:981–986
  182. **Rosenwaks Z, Lee PA, Jones GS, Migeon CJ, Wentz AC** 1979 An attenuated form of congenital virilizing adrenal hyperplasia. *J Clin Endocrinol Metab* 49:335–339
  183. **Chrousos GP, Loriaux DL, Sherins RJ, Cutler Jr GB** 1981 Unilateral testicular enlargement resulting from inapparent 21-hydroxylase deficiency. *J Urol* 126:127–128
  184. **Augarten A, Weissenberg R, Pariente C, Sack J** 1991 Reversible male infertility in late onset congenital adrenal hyperplasia. *J Endocrinol Invest* 14:237–240

185. **Kater CE, Biglieri EG, Wajchenberg B** 1985 Effects of continued adrenocorticotropin stimulation on the mineralocorticoid hormones in classical and nonclassical simple virilizing types of 21-hydroxylase deficiency. *J Clin Endocrinol Metab* 60:1057–1062
186. **Fiet J, Gueux B, Raux-De May MC, Kuttent F, Vexiau P, Brerault JL, Couillin P, Galons H, Villette JM, Julien R, Dreux C** 1989 Increased plasma 21-deoxycorticosterone (21-DB) levels in late-onset adrenal 21-hydroxylase deficiency suggest a mild defect of the mineralocorticoid pathway. *J Clin Endocrinol Metab* 68:542–547
187. **Cameron FJ, Tebbutt N, Montalto J, Yong AB, Zacharin M, Best JD, Warne GL** 1996 Endocrinology and auxology of sibships with non-classical congenital adrenal hyperplasia. *Arch Dis Child* 74:406–411
188. **Dewailly D, Vantyghem-Haudiquet MC, Sainsard C, Buvat J, Cappelon JP, Ardaens K, Racadot A, Lefebvre J, Fossati P** 1986 Clinical and biological phenotypes in late-onset 21-hydroxylase deficiency. *J Clin Endocrinol Metab* 63:418–423
189. **Feldman S, Billaud L, Thalabard JC, Raux-Demay MC, Mowszowicz I, Kuttent F, Mauvais-Jarvis P** 1992 Fertility in women with late-onset adrenal hyperplasia due to 21-hydroxylase deficiency. *J Clin Endocrinol Metab* 74:635–639
190. **Laohaprasitiporn C, Barbieri RL, Yeh J** 1996 Induction of ovulation with the sole use of clomiphene citrate in late-onset 21-hydroxylase deficiency. *Gynecol Obstet Invest* 41:224–226
191. **Speiser PW, Dupont B, Rubinstein P, Piazza A, Kastelan A, New MI** 1985 High frequency of nonclassical steroid 21-hydroxylase deficiency. *Am J Hum Genet* 37:650–667
192. **Sherman SL, Aston CE, Morton NE, Speiser PW, New MI** 1988 A segregation and linkage study of classical and nonclassical 21-hydroxylase deficiency. *Am J Hum Genet* 42:830–838
193. **Dumic M, Brkljatic L, Speiser PW, Wood E, Crawford C, Plavsic V, Baniceviac M, Radmanovic S, Radica A, Kastelan A, New M** 1990 An update on the frequency of nonclassical deficiency of adrenal 21-hydroxylase in the Yugoslav population. *Acta Endocrinol (Copenh)* 122:703–710
194. **Zerah M, Ueshiba H, Wood E, Speiser PW, Crawford C, McDonald T, Pareira J, Gruen D, New MI** 1990 Prevalence of non-classical steroid 21-hydroxylase deficiency based on a morning salivary 17-hydroxyprogesterone screening test: a small sample study. *J Clin Endocrinol Metab* 70:1662–1667
195. **Fitness J, Dixit N, Webster D, Torresani T, Pergolizzi R, Speiser PW, Day DJ** 1999 Genotyping of CYP21, linked chromosome 6p markers, and a sex-specific gene in neonatal screening for congenital adrenal hyperplasia. *J Clin Endocrinol Metab* 84:960–966
196. **del Balzo P, Borrelli P, Cambiaso P, Danielli E, Cappa M** 1992 Adrenal steroidogenic defects in children with precocious pubarche. *Horm Res* 37:180–184
197. **Likitmaskul S, Cowell CT, Donaghue K, Kreutzmann DJ, Howard NJ, Blades B, Silink M** 1995 'Exaggerated adrenarche' in children presenting with premature adrenarche. *Clin Endocrinol (Oxf)* 42:265–272
198. **Ibanez L, Bonnin MR, Zampolli M, Prat N, Alia PJ, Navarro MA** 1995 Usefulness of an ACTH test in the diagnosis of nonclassical 21-hydroxylase deficiency among children presenting with premature pubarche. *Horm Res* 44:51–56
199. **Lucky AW, Rosenfield RL, McGuire J, Rudy S, Helke J** 1986 Adrenal androgen hyperresponsiveness to adrenocorticotropin in women with acne and/or hirsutism: adrenal enzyme defects and exaggerated adrenarche. *J Clin Endocrinol Metab* 62:840–848
200. **Kuttent F, Couillin P, Girard F, Billaud L, Vincens M, Boucekine C, Thalabard JC, Maudelonde T, Spritzer P, Mowszowicz I** 1985 Late-onset adrenal hyperplasia in hirsutism. *N Engl J Med* 313:224–231
201. **Baskin HJ** 1987 Screening for late-onset congenital adrenal hyperplasia in hirsutism or amenorrhea. *Arch Intern Med* 147:847–848
202. **Azziz R, Zacur HA** 1989 21-Hydroxylase deficiency in female hyperandrogenism: screening and diagnosis. *J Clin Endocrinol Metab* 69:577–584
203. **McLaughlin B, Barrett P, Finch T, Devlin JG** 1990 Late onset adrenal hyperplasia in a group of Irish females who presented with hirsutism, irregular menses and/or cystic acne. *Clin Endocrinol (Oxf)* 32:57–64
204. **Chetkowski RJ, De Fazio J, Shamonki I, Judd HL, Chang RJ** 1984 The incidence of late-onset congenital adrenal hyperplasia due to 21-hydroxylase deficiency among hirsute women. *J Clin Endocrinol Metab* 58:595–598
205. **Pang SY, Lerner AJ, Stoner E, Levine LS, Oberfield SE, Engel I, New MI** 1985 Late-onset adrenal steroid 3 $\beta$ -hydroxysteroid dehydrogenase deficiency. I. A cause of hirsutism in pubertal and post-pubertal women. *J Clin Endocrinol Metab* 60:428–439
206. **Speiser PW, New MI, White PC** 1988 Molecular genetic analysis of nonclassical steroid 21-hydroxylase deficiency associated with HLA-B14,DR1. *N Engl J Med* 319:19–23
207. **Ojeifo JO, Winters SJ, Troen P** 1984 Basal and adrenocorticotrophic hormone-stimulated serum 17 $\alpha$ -hydroxyprogesterone in men with idiopathic infertility. *Fertil Steril* 42:97–101
208. **Wischusen J, Baker HW, Hudson B** 1981 Reversible male infertility due to congenital adrenal hyperplasia. *Clin Endocrinol (Oxf)* 14:571–577
209. **Wilson RC, Mercado AB, Cheng KC, New MI** 1995 Steroid 21-hydroxylase deficiency: genotype may not predict phenotype. *J Clin Endocrinol Metab* 80:2322–2329
210. **Blanche H, Vexiau P, Clauin S, Le Gall I, Fiet J, Mornet E, Dausset J, Bellanne-Chantelot C** 1997 Exhaustive screening of the 21-hydroxylase gene in a population of hyperandrogenic women. *Hum Genet* 101:56–60
211. **Knochenhauer ES, Cortet-Rudelli C, Cunningham RD, Conway BA, Dewailly D, Azziz R** 1997 Carriers of 21-hydroxylase deficiency are not at increased risk for hyperandrogenism. *J Clin Endocrinol Metab* 82:479–485
212. **Witchel SE, Lee PA, Suda-Hartman M, Hoffman EP** 1997 Hyperandrogenism and manifesting heterozygotes for 21-hydroxylase deficiency. *Biochem Mol Med* 62:151–158
213. **Danon M, Friedman SC** 1996 Ambiguous genitalia, micropenis, hypospadias, and cryptorchidism. In: Lifshitz F (ed) *Pediatric Endocrinology*. Marcel Dekker, New York, pp 281–304
214. **Grumbach MM, Conte FA** 1998 Disorders of sex differentiation. In: Wilson JD, Foster DW, Kronenberg HM, Larsen PR (eds) *Williams Textbook of Endocrinology*. W.B. Saunders, Philadelphia, pp 1303–1426
215. **Pang S, Spence DA, New MI** 1985 Newborn screening for congenital adrenal hyperplasia with special reference to screening in Alaska. *Ann NY Acad Sci* 458:90–102
216. **Pang S, Shook MK** 1997 Current status of neonatal screening for congenital adrenal hyperplasia. *Curr Opin Pediatr* 9:419–423
217. **Allen DB, Hoffmann GL, Fitzpatrick P, Laessig R, Maby S, Slyper A** 1997 Improved precision of newborn screening for congenital adrenal hyperplasia using weight-adjusted criteria for 17-hydroxyprogesterone levels. *J Pediatr* 130:128–133
218. **Therrell BLJ, Berenbaum SA, Manter-Kapanke V, Simmank J, Korman K, Prentice L, Gonzalez J, Gunn S** 1998 Results of screening 1.9 million Texas newborns for 21-hydroxylase-deficient congenital adrenal hyperplasia. *Pediatrics* 101:583–590
219. **Lange-Kubini K, Zachmann M, Kempken B, Torresani T** 1996 15 beta-hydroxylated steroids may be diagnostically misleading in confirming congenital adrenal hyperplasia suspected by a newborn screening programme. *Eur J Pediatr* 155:928–931
220. **Nomura S** 1997 Immature adrenal steroidogenesis in preterm infants. *Early Hum Dev* 49:225–233
221. **Pang S, Murphey W, Levine LS, Spence DA, Leon A, La Franchi S, Surve AS, New MI** 1982 A pilot newborn screening for congenital adrenal hyperplasia in Alaska. *J Clin Endocrinol Metab* 55:413–420
222. **Suwa S** 1994 Nationwide survey of neonatal mass-screening for congenital adrenal hyperplasia in Japan. *Screening* 3:141–151
223. **Cutfield WS, Webster D** 1995 Newborn screening for congenital adrenal hyperplasia in New Zealand. *J Pediatr* 126:118–121
224. **Balsamo A, Cacciari E, Piazzi S, Cassio A, Bozza A, Pirazzoli P, Zappulla F** 1996 Congenital adrenal hyperplasia: neonatal mass screening compared with clinical diagnosis only in the Emilia-Romagna region of Italy, 1980–1995. *Pediatrics* 98:362–367
225. **Thil'en A, Nordenstrom A, Hagenfeldt L, von Dobeln U, Guttenberg C, Larsson A** 1998 Benefits of neonatal screening for congenital adrenal hyperplasia (21-hydroxylase deficiency) in Sweden. *Pediatrics* 101:E11
226. **Brosnan PG, Brosnan CA, Kemp SF, Domek DB, Jelley DH,**

- Blackett PR, Riley WJ 1999 Effect of newborn screening for congenital adrenal hyperplasia. *Arch Pediatr Adolesc Med* 153:1272-1278
227. Lebovitz RM, Pauli RM, Laxova R 1984 Delayed diagnosis in congenital adrenal hyperplasia. Need for newborn screening. *Am J Dis Child* 138:571-573
228. Thompson R, Seargeant L, Winter JS 1989 Screening for congenital adrenal hyperplasia: distribution of 17 $\alpha$ -hydroxyprogesterone concentrations in neonatal blood spot specimens. *J Pediatr* 114:400-404
229. Thilen A, Larsson A 1990 Congenital adrenal hyperplasia in Sweden 1969-1986. Prevalence, symptoms and age at diagnosis. *Acta Paediatr Scand* 79:168-175
230. Brosnan CA, Brosnan P, Therrell BL, Slater CH, Swint JM, Annegers JF, Riley WJ 1998 A comparative cost analysis of newborn screening for classic congenital adrenal hyperplasia in Texas. *Public Health Rep* 113:170-178
231. Gessner BD, Teutsch SM, Shaffer PA 1996 A cost-effectiveness evaluation of newborn hemoglobinopathy screening from the perspective of state health care systems. *Early Hum Dev* 45:257-275
232. Tajima T, Fujieda K, Nakae J, Toyoura T, Shimozawa K, Kusuda S, Goji K, Nagashima T, Cutler Jr GB 1997 Molecular basis of nonclassical steroid 21-hydroxylase deficiency detected by neonatal mass screening in Japan. *J Clin Endocrinol Metab* 82:2350-2356
233. Nordenstrom A, Thilen A, Hagenfeldt L, Larsson A, Wedell A 1999 Genotyping is a valuable diagnostic complement to neonatal screening for congenital adrenal hyperplasia due to steroid 21-hydroxylase deficiency. *J Clin Endocrinol Metab* 84:1505-1509
234. Abdu TA, Elhadd TA, Neary R, Clayton RN 1999 Comparison of the low dose short synacthen test (1 microg), the conventional dose short synacthen test (250 microg), and the insulin tolerance test for assessment of the hypothalamo-pituitary-adrenal axis in patients with pituitary disease. *J Clin Endocrinol Metab* 84:838-843
235. Zarkovic M, Ciric J, Stojanovic M, Penezic Z, Trbojevic B, Drezgic M, Nesovic M 1999 Optimizing the diagnostic criteria for standard (250 microg) and low dose (1 microg) adrenocorticotropin tests in the assessment of adrenal function. *J Clin Endocrinol Metab* 84:3170-3173
236. Rosler A, Levine LS, Schneider B, Novogroder M, New MI 1977 The interrelationship of sodium balance, plasma renin activity and ACTH in congenital adrenal hyperplasia. *J Clin Endocrinol Metab* 45:500-512
237. Kruger C, Hoper K, Weissortel R, Hensen J, Dorr HG 1996 Value of direct measurement of active renin concentrations in congenital adrenal hyperplasia due to 21-hydroxylase deficiency. *Eur J Pediatr* 155:858-861
238. Kruger C, Rauh M, Dorr HG 1998 Immunoreactive renin concentrations in healthy children from birth to adolescence. *Clin Chim Acta* 274:15-27
239. Nicholson JF, Pesce MA 1996 Laboratory testing and reference values in infants and children. In: Behrman RE, Kliegman RM, Arvin AM, Nelson WE (eds) *Nelson's Textbook of Pediatrics*. W.B. Saunders, Philadelphia, pp 2031-2084
240. Wudy SA, Homoki J, Teller WM 1996 [Gas chromatography-mass spectrometry determination of plasma 5  $\alpha$ -androstane-3  $\alpha$ ,17 $\beta$ -diol and 5  $\alpha$ -androstane-3 $\alpha$ ,17 $\beta$ -diol glucuronide in children with premature and normal puberty]. [German]. *Klin Padiatr* 208:334-338
241. Lopes LA, Catzeflis C, Cicotti I, Rey C, Sizonenko PC 1997 Plasma 3  $\alpha$ -androstane diol glucuronide in normal children and in congenital adrenal hyperplasia due to 21-hydroxylase deficiency. *Horm Res* 48:35-40
242. Yang Y, Saisho S, Toyoura T, Shimozawa K, Yata J 1996 Urinary pregnanetriol-3-glucuronide in children: age-related change and application to the management of 21-hydroxylase deficiency. *Acta Paediatr Jpn* 38:107-113
243. Malunowicz EM, Mitkowska Z, Bal K, Nizankowska-Blaz T, Moszczynska E, Iwanicka Z, Romer TE 1997 Definitive diagnosis of enzymatic deficiencies of steroidogenesis in at-risk newborns and infants by urinary marker analysis using GC/MS-SIM. *Horm Res* 48:243-251
244. Kerrigan JR, Veldhuis JD, Leyo SA, Iranmanesh A, Rogol AD 1993 Estimation of daily cortisol production and clearance rates in normal pubertal males by deconvolution analysis. *J Clin Endocrinol Metab* 76:1505-1510
245. Linder BL, Esteban NV, Yergey AL, Winterer JC, Loriaux DL, Cassorla F 1990 Cortisol production rate in childhood and adolescence. *J Pediatr* 117:892-896
246. Metzger DL, Wright NM, Veldhuis JD, Rogol AD, Kerrigan JR 1993 Characterization of pulsatile secretion and clearance of plasma cortisol in premature and term neonates using deconvolution analysis. *J Clin Endocrinol Metab* 77:458-463
247. Shimon I, Kaiserman I, Sack J 1995 Home monitoring of 17 $\alpha$ -hydroxyprogesterone levels by filter paper blood spots in patients with 21-hydroxylase deficiency. *Horm Res* 44:247-252
248. Heazelwood VJ, Galligan P, Cannell GR, Bochner F, Mortimer RH 1984 Plasma cortisol delivery from oral cortisol and cortisone acetate: relative bioavailability. *Br J Clin Pharmacol* 17:55-59
249. Nordenstrom A, Marcus C, Axelsson M, Wedell A, Ritzen EM 1999 Failure of cortisone acetate treatment in congenital adrenal hyperplasia because of defective 11 $\beta$ -hydroxysteroid dehydrogenase reductase activity. *J Clin Endocrinol Metab* 84:1210-1213
250. Bode HH, Rivkees SA, Cowley DM, Pardy K, Johnson S 1999 Home monitoring of 17 hydroxyprogesterone levels in congenital adrenal hyperplasia with filter paper blood samples. *J Pediatr* 134:185-189
251. Hughes IA, Read GF 1984 Control in congenital adrenal hyperplasia monitored by frequent saliva 17OH-progesterone measurements. *Horm Res* 19:77-85
252. Zerah M, Pang SY, New MI 1987 Morning salivary 17-hydroxyprogesterone is a useful screening test for nonclassical 21-hydroxylase deficiency. *J Clin Endocrinol Metab* 65:227-232
253. Robinson JA, Dyas J, Hughes IA, Riad-Fahmy D 1987 Radioimmunoassay of blood-spot 17 $\alpha$ -hydroxyprogesterone in the management of congenital adrenal hyperplasia. *Ann Clin Biochem* 24:58-65
254. Silva IN, Kater CE, Cunha CF, Viana MB 1997 Randomised controlled trial of growth effect of hydrocortisone in congenital adrenal hyperplasia. *Arch Dis Child* 77:214-218
255. Yu AC, Grant DB 1995 Adult height in women with early-treated congenital adrenal hyperplasia (21-hydroxylase type): relation to body mass index in earlier childhood. *Acta Paediatr* 84:899-903
256. Cornean RE, Hindmarsh PC, Brook CG 1998 Obesity in 21-hydroxylase deficient patients. *Arch Dis Child* 78:261-263
257. Cameron FJ, Kaymakci B, Byrt EA, Ebeling PR, Warne GL, Wark JD 1995 Bone mineral density and body composition in congenital adrenal hyperplasia. *J Clin Endocrinol Metab* 80:2238-2243
258. Mora S, Saggion F, Russo G, Weber G, Bellini A, Prinster C, Chiumello 1996 Bone density in young patients with congenital adrenal hyperplasia. *Bone* 18:337-340
259. Gussinye M, Carrascosa A, Potau N, Erubia M, Vicens-Calvet E, Ibanez L, Yeste D 1997 Bone mineral density in prepubertal and in adolescent and young adult patients with the salt-wasting form of congenital adrenal hyperplasia. *Pediatrics* 100:671-674
260. Jaaskelainen J, Voutilainen R 1996 Bone mineral density in relation to glucocorticoid substitution therapy in adult patients with 21-hydroxylase deficiency. *Clin Endocrinol (Oxf)* 45:707-713
261. Guo CY, Weetman AP, Eastell R 1996 Bone turnover and bone mineral density in patients with congenital adrenal hyperplasia. *Clin Endocrinol (Oxf)* 45:535-541
262. Weintrob N, Dickerman Z, Sprecher E, Galatzer A, Pertzlan A 1997 Non-classical 21-hydroxylase deficiency in infancy and childhood: the effect of time of initiation of therapy on puberty and final height. *Eur J Endocrinol* 136:188-195
263. Mirsky HA, Hines JH 1989 Infertility in a man with 21-hydroxylase deficient congenital adrenal hyperplasia. *J Urol* 142:111-113
264. Iwamoto T, Yajima M, Tanaka H, Minagawa N, Osada T 1993 A case report: reversible male infertility due to congenital adrenal hyperplasia. *Nippon Hinyokika Gakkai Zasshi* 84:2031-2034
265. Biglieri EG, Kater CE 1991 Mineralocorticoids in congenital adrenal hyperplasia. *J Steroid Biochem Mol Biol* 40:493-499
266. Lopes LA, Dubuis JM, Vallotton MB, Sizonenko PC 1998 Should we monitor more closely the dosage of 9 $\alpha$ -fluorohydrocortisone in salt-losing congenital adrenal hyperplasia? *J Pediatr Endocrinol Metab* 11:733-737
267. Laue L, Merke DP, Jones JV, Barnes KM, Hill S, Cutler Jr GB 1996 A preliminary study of flutamide, testolactone, and reduced hy-



- drocortisone dose in the treatment of congenital adrenal hyperplasia. *J Clin Endocrinol Metab* 81:3535-3539
268. **Merke DP, Keil MF, Jones JV, Fields J, Hill S, Cutler Jr GB** 2000 Flutamide, testolactone, and reduced hydrocortisone dose maintain normal growth velocity and bone maturation despite elevated androgen levels in children with congenital adrenal hyperplasia. *J Clin Endocrinol Metab* 85:1114-1120
  269. **White PC, Mune T, Agarwal AK** 1997  $11\beta$ -hydroxysteroid dehydrogenase and the syndrome of apparent mineralocorticoid excess. *Endocr Rev* 18:135-156
  270. **Irony I, Cutler Jr GB**, Effect of carbenoxolone on the plasma renin activity and hypothalamic-pituitary-adrenal axis in congenital adrenal hyperplasia due to 21-hydroxylase deficiency. *Clin Endocrinol (Oxf)*, in press
  271. **Speiser PW**, Commentary: toward better treatment of congenital adrenal hyperplasia. *Clin Endocrinol (Oxf)*, in press
  272. **Kageyama Y, Kitahara S, Tsukamoto T, Tsujii T, Goto S, Oshima H** 1995 Chlormadinone acetate as a possible effective agent for congenital adrenal hyperplasia to suppress elevated ACTH and antagonize masculinization. *Endocr J* 42:505-508
  273. **Van Wyk JJ, Gunther DF, Ritzen EM, Wedell A, Cutler Jr GB, Migeon CJ, New MI** 1996 The use of adrenalectomy as a treatment for congenital adrenal hyperplasia. *J Clin Endocrinol Metab* 81:3180-3190
  274. **Labrie F, Belanger A, Van LT, Labrie C, Simard J, Cusan L, Gomez JL, Candas B** 1998 DHEA and the intracrine formation of androgens and estrogens in peripheral target tissues: its role during aging. *Steroids* 63:322-328
  275. **Arlt W, Callies F, van Vlijmen JC, Koehler I, Reincke M, Biddingmaier M, Huebler D, Oettel M, Ernst M, Schulte HM, Alوليو B** 1999 Dehydroepiandrosterone replacement in women with adrenal insufficiency. *N Engl J Med* 341:1013-1020
  276. **Gunther DF, Bukowski TP, Ritzen EM, Wedell A, Van Wyk JJ** 1997 Prophylactic adrenalectomy of a three-year-old girl with congenital adrenal hyperplasia: pre- and postoperative studies. *J Clin Endocrinol Metab* 82:3324-3327
  277. **Stratakis CA, Rennert OM** 1999 Congenital adrenal hyperplasia: molecular genetics and alternative approaches to treatment. *Crit Rev Clin Lab Sci* 36:329-363
  278. **Gotoh H, Kusakabe M, Shiroishi T, Moriwaki K** 1994 Survival of steroid 21-hydroxylase-deficient mice without endogenous corticosteroids after neonatal treatment and genetic rescue by transgenesis as a model system for treatment of congenital adrenal hyperplasia in humans. *Endocrinology* 135:1470-1476
  279. **Wilson BE, Reiner WG** 1998 Management of intersex: a shifting paradigm. *J Clin Ethics* 9:360-370
  280. **Schober JM** 1998 A surgeon's response to the intersex controversy. *J Clin Ethics* 9:393-397
  281. **Diamond M, Sigmondson HK** 1997 Sex reassignment at birth. Long-term review and clinical implications. *Arch Pediatr Adolesc Med* 151:298-304
  282. **Howe EG** 1998 Intersexuality: what should care providers do now. *J Clin Ethics* 9:337-344
  283. **Kipnis K, Diamond M** 1998 Pediatric ethics and the surgical assignment of sex. *J Clin Ethics* 9:398-410
  284. **Gonzalez R, Fernandes ET** 1990 Single-stage feminization genitoplasty. *J Urol* 143:776-778
  285. **Newman K, Randolph J, Parson S** 1992 Functional results in young women having clitoral reconstruction as infants. *J Pediatr Surg* 27:180-183
  286. **Hendren WH, Atala A** 1995 Repair of the high vagina in girls with severely masculinized anatomy from the adrenogenital syndrome. *J Pediatr Surg* 30:91-94
  287. **Costa EM, Mendonca BB, Inacio M, Arnhold IJ, Silva FA, Lodovici O** 1997 Management of ambiguous genitalia in pseudohermaphrodites: new perspectives on vaginal dilation. *Fertil Steril* 67:229-232
  288. **Bailez MM, Gearhart JP, Migeon C, Rock J** 1992 Vaginal reconstruction after initial construction of the external genitalia in girls with salt-wasting adrenal hyperplasia. *J Urol* 148:680-682
  289. **Alizai NK, Thomas DF, Lilford RJ, Batchelor AG, Johnson N** 1999 Feminizing genitoplasty for congenital adrenal hyperplasia: what happens at puberty?. *J Urol* 161:1588-1591
  290. **Passerini-Glazel G** 1989 A new 1-stage procedure for clitorovaginoplasty in severely masculinized female pseudohermaphrodites. *J Urol* 142:t-8
  291. **Donahoe PK, Gustafson ML** 1994 Early one-stage surgical reconstruction of the extremely high vagina in patients with congenital adrenal hyperplasia. *J Pediatr Surg* 29:352-358
  292. **Powell DM, Newman KD, Randolph J** 1995 A proposed classification of vaginal anomalies and their surgical correction. *J Pediatr Surg* 30:271-275
  293. **Belloli G, Campobasso P, Musi L** 1997 Labial skin-flap vaginoplasty using tissue expanders. *Pediatr Surg Int* 12:168-171
  294. **Domini R, Rossi F, Ceccarelli PL, De Castro R** 1997 Anterior sagittal transanorectal approach to the urogenital sinus in adrenogenital syndrome: preliminary report. *J Pediatr Surg* 32:714-716
  295. **Azziz R, Mulaikal RM, Migeon CJ, Jones Jr HW, Rock JA** 1986 Congenital adrenal hyperplasia: long-term results following vaginal reconstruction [published erratum appears in *Fertil Steril* 1987 Jun; 47(6):1043]. *Fertil Steril* 46:1011-1014
  296. **Premawardhana LD, Hughes IA, Read GF, Scanlon MF** 1997 Longer term outcome in females with congenital adrenal hyperplasia (CAH): the Cardiff experience. *Clin Endocrinol (Oxf)* 46:327-332
  297. **Engstrom I** 1999 Inflammatory bowel disease in children and adolescents: mental health and family functioning. *J Pediatr Gastroenterol Nutr* 28:S28-S33
  298. **Speiser PW** 1995 Transient central precocious puberty in non-classic 21-hydroxylase deficiency. *J Pediatr Endocrinol Metab* 8:287-289
  299. **Pescovitz OH, Comite F, Cassorla F, Dwyer AJ, Poth MA, Sperling MA, Hench K, McNemar A, Skerden M, Loriaux DL** 1984 True precocious puberty complicating congenital adrenal hyperplasia: treatment with a luteinizing hormone-releasing hormone analog. *J Clin Endocrinol Metab* 58:857-861
  300. **Soliman AT, AILamki M, AISalmi I, Asfour M** 1997 Congenital adrenal hyperplasia complicated by central precocious puberty: linear growth during infancy and treatment with gonadotropin-releasing hormone analog. *Metabolism* 46:513-517
  301. **Adan L, Souberbielle JC, Zucker JM, Pierre-Kahn A, Kalifa C, Brauner R** 1997 Adult height in 24 patients treated for growth hormone deficiency and early puberty. *J Clin Endocrinol Metab* 82:229-233
  302. **Lanes R, Gunczler P** 1998 Final height after combined growth hormone and gonadotrophin-releasing hormone analogue therapy in short healthy children entering into normally timed puberty. *Clin Endocrinol (Oxf)* 49:197-202
  303. **David M, Forest MG** 1984 Prenatal treatment of congenital adrenal hyperplasia resulting from 21-hydroxylase deficiency. *J Pediatr* 105:799-803
  304. **Evans MI, Chrousos GP, Mann DW, Larsen JWJ, Green I, McCluskey J, Loriaux DL, Fletcher JC, Koons G, Overpeck J** 1985 Pharmacologic suppression of the fetal adrenal gland *in utero*. Attempted prevention of abnormal external genital masculinization in suspected congenital adrenal hyperplasia. *JAMA* 253:1015-1020
  305. **Speiser PW, Laforgia N, Kato K, Pareira J, Khan R, Yang SY, Whorwood C, White PC, Elias S, Schriock E, Simpson JL, Taslimi M, Najjar J, May S, Mills G, Crawford C, New MI** 1990 First trimester prenatal treatment and molecular genetic diagnosis of congenital adrenal hyperplasia (21-hydroxylase deficiency). *J Clin Endocrinol Metab* 70:838-848
  306. **Mercado AB, Wilson RC, Cheng KC, Wei JQ, New MI** 1995 Prenatal treatment and diagnosis of congenital adrenal hyperplasia owing to steroid 21-hydroxylase deficiency. *J Clin Endocrinol Metab* 80:2014-2020
  307. **Forest MG, Betuel H, David M** 1989 Prenatal treatment in congenital adrenal hyperplasia due to 21-hydroxylase deficiency: update 88 of the French multicentric study. *Endocr Res* 15:277-301
  308. **Haan EA, Serjeantson SW, Norman R, Rollond AK, Antonis P, Richards RI, Penfold JL** 1992 Prenatal diagnosis and successful intrauterine treatment of a female fetus with 21-hydroxylase deficiency. *Med J Aust* 156:132-135
  309. **Dorr HG, Sippell WG** 1993 Prenatal dexamethasone treatment in pregnancies at risk for congenital adrenal hyperplasia due to 21-hydroxylase deficiency: effect on midgestational amniotic fluid steroid levels. *J Clin Endocrinol Metab* 76:117-120
  310. **Forest MG, Morel Y, David M** 1998 Prenatal treatment of congenital adrenal hyperplasia. *Trends Endocrinol Metab* 9:284-289

311. Lajic S, Wedell A, Bui TH, Ritzen EM, Holst M 1998 Long-term somatic follow-up of prenatally treated children with congenital adrenal hyperplasia. *J Clin Endocrinol Metab* 83:3872–3880
312. Migeon CJ 1990 Editorial: Comments about the need for prenatal treatment of congenital adrenal hyperplasia due to 21 hydroxylase deficiency. *J Clin Endocrinol Metab* 70:836–837
313. Pang S, Pollack MS, Marshall RN, Immken L 1990 Prenatal treatment of congenital adrenal hyperplasia due to 21-hydroxylase deficiency. *N Engl J Med* 322:111–115
314. Malunowicz EM, Ginalska-Malinowska M, Romer TE, Bal K 1998 The influence of prenatal dexamethasone treatment on urinary excretion of adrenocortical steroids in newborns. *Eur J Pediatr* 157:539–543
315. Chin D, Speiser PW, Imperato-McGinley J, Dixit N, Uli N, David R, Oberfield SE 1998 Study of a kindred with classic congenital adrenal hyperplasia: diagnostic challenge due to phenotypic variance. *J Clin Endocrinol Metab* 83:1940–1945
316. Quercia N, Chitayat D, Babul-Hirji R, New MI, Daneman D 1998 Normal external genitalia in a female with classical congenital adrenal hyperplasia who was not treated during embryogenesis. *Prenat Diagn* 18:83–85
317. Forest MG, David M, Morel Y 1993 Prenatal diagnosis and treatment of 21-hydroxylase deficiency. *J Steroid Biochem Mol Biol* 45:75–82
318. Lajic S, Bui TH, Holst M, Ritzen M, Wedell A 1997 [Prenatal diagnosis and treatment of adrenogenital syndrome. Prevent virilization of female fetuses]. [Swedish]. *Lakartidningen* 94:4781–4786
319. Kuliev A, Jackson L, Froster U, Brambati B, Simpson JL, Verlinsky Y, Ginsberg N, Smidt-Jensen S, Zakut H 1996 Chorionic villus sampling safety. Report of World Health Organization/EURO meeting in association with the Seventh International Conference on Early Prenatal Diagnosis of Genetic Diseases, Tel-Aviv, Israel, May 21, 1994. *Am J Obstet Gynecol* 174:807–811
320. Partsch CJ, Sippell WG, MacKenzie IZ, Aynsley-Green A 1991 The steroid hormonal milieu of the undisturbed human fetus and mother at 16–20 weeks gestation. *J Clin Endocrinol Metab* 73:969–974
321. Forest MG 1997 Prenatal diagnosis and treatment of congenital adrenal hyperplasia. *Clin Courier* 16:26–27
322. Couper JJ, Hutson JM, Warne GL 1993 Hydrometrocolpos following prenatal dexamethasone treatment for congenital adrenal hyperplasia (21-hydroxylase deficiency). *Eur J Pediatr* 152:9–11
323. Koops BL, Morgan LJ, Battaglia FC 1982 Neonatal mortality risk in relation to birth weight and gestational age: update. *J Pediatr* 101:969–977
324. Goldman AS, Sharpior BH, Katsumata M 1978 Human foetal palatal corticoid receptors and teratogens for cleft palate. *Nature* 272:464–466
325. Benediktsson R, Lindsay RS, Noble J, Seckl JR, Edwards CR 1993 Glucocorticoid exposure *in utero*: new model for adult hypertension [published erratum appears in *Lancet* 1993 Feb 27; 341(8844): 572]. *Lancet* 341:339–341
326. Slotkin TA, Zhang J, McCook EC, Seidler FJ 1998 Glucocorticoid administration alters nuclear transcription factors in fetal rat brain: implications for the use of antenatal steroids. *Brain Res Dev Brain Res* 111:11–24
327. Trautman PD, Meyer-Bahlburg HF, Postelnek J, New MI 1995 Effects of early prenatal dexamethasone on the cognitive and behavioral development of young children: results of a pilot study. *Psychoneuroendocrinology* 20:439–449
328. Seckl JR, Miller WL 1997 How safe is longterm prenatal glucocorticoid treatment? *JAMA* 277:1077–1079
329. Ritzen EM 1998 Prenatal treatment of congenital adrenal hyperplasia: a commentary. *Trends Endocrinol Metab* 9:293–295
330. Miller WL 1998 Prenatal treatment of congenital adrenal hyperplasia: a promising experimental therapy of unproven safety. *Trends Endocrinol Metab* 9:290–292
331. Pang S, Clark AT, Freeman LC, Dolan LM, Immken L, Mueller OT, Stiff D, Shulman DI 1992 Maternal side effects of prenatal dexamethasone therapy for fetal congenital adrenal hyperplasia. *J Clin Endocrinol Metab* 75:249–253
332. Trautman PD, Meyer-Bahlburg HF, Postelnek J, New MI 1996 Mothers' reactions to prenatal diagnostic procedures and dexamethasone treatment of congenital adrenal hyperplasia. *J Psychosom Obstet Gynaecol* 17:175–181
333. Cerame BI, Newfield RS, Pascoe L, Curnow KM, Nimkarn S, Roe TF, New MI, Wilson RC 1999 Prenatal diagnosis and treatment of 11 $\beta$ -hydroxylase deficiency congenital adrenal hyperplasia resulting in normal female genitalia. *J Clin Endocrinol Metab* 84:3129–3134
334. Barbat B, Bogoy A, Raux-Demay MC, Kuttann F, Boue J, Simon-Bouy B, Serre JL, Mornet E 1995 Screening of CYP21 gene mutations in 129 French patients affected by steroid 21-hydroxylase deficiency. *Hum Mutat* 5:126–130
335. Kominami S, Ochi H, Kobayashi Y, Takemori S 1980 Studies on the steroid hydroxylation system in adrenal cortex microsomes. Purification and characterization of cytochrome P-450 specific for steroid C-21 hydroxylation. *J Biol Chem* 255:3386–3394
336. Kominami S, Hara H, Ogishima T, Takemori S 1984 Interaction between cytochrome P-450 (P-450C21) and NADPH-cytochrome P-450 reductase from adrenocortical microsomes in a reconstituted system. *J Biol Chem* 259:2991–2999
337. Kominami S, Itoh Y, Takemori S 1986 Studies on the interaction of steroid substrates with adrenal microsomal cytochrome P-450 (P-450C21) in liposome membranes. *J Biol Chem* 261:2077–2083
338. Haniu M, Yanagibashi K, Hall PF, Shively JE 1987 Complete amino acid sequence of 21-hydroxylase cytochrome P-450 from porcine adrenal microsomes. *Arch Biochem Biophys* 254:380–384
339. Kominami S, Inoue S, Higuchi A, Takemori S 1989 Steroidogenesis in liposomal system containing adrenal microsomal cytochrome P-450 electron transfer components. *Biochim Biophys Acta* 985:293–299
340. Narasimhulu S 1991 Inhibition of substrate binding to the adrenal cytochrome P450C-21 by acrylamide and its implications for solvent accessibility of the binding site in the microsomes. *Biochemistry* 30:9319–9327
341. Kominami S, Tagashira H, Ohta Y, Yamada M, Kawato S, Takemori S 1993 Membrane topology of bovine adrenocortical cytochrome P-450C21: structural studies by trypsin digestion in vesicle membranes. *Biochemistry* 32:12935–12940
342. Sevrioukova IF, Peterson JA 1995 NADPH-P-450 reductase: structural and functional comparisons of the eukaryotic and prokaryotic isoforms. *Biochimie* 77:562–572
343. Higashi Y, Yoshioka H, Yamane M, Gotoh O, Fujii-Kuriyama Y 1986 Complete nucleotide sequence of two steroid 21-hydroxylase genes tandemly arranged in human chromosome: a pseudogene and a genuine gene. *Proc Natl Acad Sci USA* 83:2841–2845
344. White PC, New MI, Dupont B 1986 Structure of human steroid 21-hydroxylase genes. *Proc Natl Acad Sci USA* 83:5111–5115
345. Rodrigues NR, Dunham I, Yu CY, Carroll MC, Porter RR, Campbell RD 1987 Molecular characterization of the HLA-lined steroid 21-hydroxylase B gene from an individual with congenital adrenal hyperplasia. *EMBO J* 6:1653–1661
346. Tusie-Luna MT, Traktman P, White PC 1990 Determination of functional effects of mutations in the steroid 21-hydroxylase gene (CYP21) using recombinant vaccinia virus. *J Biol Chem* 265:20916–20922
347. Nelson DR, Strobel HW 1989 Secondary structure prediction of 52 membrane-bound cytochromes P450 shows a strong structural similarity to P450cam. *Biochemistry* 28:656–660
348. Black SD 1992 Membrane topology of the mammalian P450 cytochromes. *FASEB J* 6:680–685
349. Poulos TL 1991 Modeling of mammalian P450 s on basis of P450cam X-ray structure. *Methods Enzymol* 206:11–30
350. Hasemann CA, Ravichandran KG, Peterson JA, Deisenhofer J 1994 Crystal structure and refinement of cytochrome P450terp at 2.3 Å resolution. *J Mol Biol* 236:1169–1185
351. Cupp-Vickery JR, Poulos TL 1995 Structure of cytochrome P450eryF involved in erythromycin biosynthesis. *Nat Struct Biol* 2:144–153
352. Ruettinger RT, Wen LP, Fulco AJ 1989 Coding nucleotide 5' regulatory and deduced amino acid sequences of P-450BM-3, a single peptide cytochrome P-450: NADPH-P-450 reductase from *Bacillus megaterium*. *J Biol Chem* 264:10987–10995
353. Ravichandran KG, Boddupalli SS, Hasemann CA, Peterson JA,

- Deisenhofer J** 1993 Crystal structure of hemoprotein domain of P450BM-3, a prototype for microsomal P450's. *Science* 261:731-736
354. **Lewis DF, Lee-Robichaud P** 1998 Molecular modelling of steroidogenic cytochromes P450 from families CYP11, CYP17, CYP19 and CYP21 based on the CYP102 crystal structure. *J Steroid Biochem Mol Biol* 66:217-233
355. **Graham-Lorence S, Amarnah B, White RE, Peterson JA, Simpson ER** 1995 A three-dimensional model of aromatase cytochrome P450. *Protein Sci* 4:1065-1080
356. **Auchus RJ, Miller WL** 1999 Molecular modeling of human P450c17 (17 $\alpha$ -hydroxylase/17, 20-lyase): insights into reaction mechanisms and effects of mutations. *Mol Endocrinol* 13:1169-1182
357. **Wu DA, Chung BC** 1991 Mutations of P450c21 (steroid 21-hydroxylase) at Cys428, Val281, and Ser268 result in complete, partial, or no loss of enzymatic activity, respectively. *J Clin Invest* 88:519-523
358. **Raag R, Martinis SA, Sligar SG, Poulos TL** 1991 Crystal structure of the cytochrome P-450CAM active site mutant Thr252Ala. *Biochemistry* 30:11420-11429
359. **Curnow KM, Slutsker L, Vitek J, Cole T, Speiser PW, New MI, White PC, Pascoe L** 1993 Mutations in the CYP11B1 gene causing congenital adrenal hyperplasia and hypertension cluster in exons 6, 7, and 8. *Proc Natl Acad Sci USA* 90:4552-4556
360. **Rein H, Jung C** 1993 Metabolic reactions: mechanisms of substrate oxygenation. In: Schenkman JB, Greim H (eds) *Cytochrome P450*. Springer-Verlag, Berlin, pp 105-122
361. **White PC** 1987 Genetics of steroid 21-hydroxylase deficiency. *Recent Prog Horm Res* 43:305-336
362. **Picado-Leonard J, Miller WL** 1988 Homologous sequences in steroidogenic enzymes, steroid receptors and a steroid binding protein suggest a consensus steroid-binding sequence. *Mol Endocrinol* 2:1145-1150
363. **Wada A, Waterman MR** 1992 Identification by site-directed mutagenesis of two lysine residues in cholesterol side chain cleavage cytochrome P450 that are essential for adrenodoxin binding. *J Biol Chem* 267:22877-22882
364. **Geller DH, Auchus RJ, Miller WL** 1999 P450c17 mutations R347H and R358Q selectively disrupt 17,20-lyase activity by disrupting interactions with P450 oxidoreductase and cytochrome b5. *Mol Endocrinol* 13:167-175
365. **Chiou SH, Hu MC, Chung BC** 1990 A missense mutation at Ile172—Asn or Arg356—Trp causes steroid 21-hydroxylase deficiency. *J Biol Chem* 265:3549-3552
366. **Lajic S, Levo A, Nikoshkov A, Lundberg Y, Partanen J, Wedell A** 1997 A cluster of missense mutations at Arg356 of human steroid 21-hydroxylase may impair redox partner interaction. *Hum Genet* 99:704-709
367. **Lobato MN, Ordonez-Sanchez ML, Tusie-Luna MT, Meseguer A** 1999 Mutation analysis in patients with congenital adrenal hyperplasia in the Spanish population: identification of putative novel steroid 21-hydroxylase deficiency alleles associated with the classic form of the disease. *Hum Hered* 49:169-175
368. **Shimizu T, Tateishi T, Hatano M, Fujii-Kuriyama Y** 1991 Probing the role of lysines and arginines in the catalytic function of cytochrome P450d by site-directed mutagenesis. Interaction with NADPH-cytochrome P450 reductase. *J Biol Chem* 266:3372-3375
369. **Carroll MC, Campbell RD, Porter RR** 1985 Mapping of steroid 21-hydroxylase genes adjacent to complement component C4 genes in HLA, the major histocompatibility complex in man. *Proc Natl Acad Sci USA* 82:521-525
370. **White PC, Grossberger D, Onufer BJ, Chaplin DD, New MI, Dupont B, Strominger JL** 1985 Two genes encoding steroid 21-hydroxylase are located near the genes encoding the fourth component of complement in man. *Proc Natl Acad Sci USA* 82:1089-1093
371. **Shen L, Wu LC, Sanlioglu S, Chen R, Mendoza AR, Dangel AW, Carroll MC, Zipf WB, Yu CY** 1994 Structure and genetics of the partially duplicated gene RP located immediately upstream of the complement C4A and the C4B genes in the HLA class III region. Molecular cloning, exon-intron structure, composite retroposon, and breakpoint of gene duplication. *J Biol Chem* 269:8466-8476
372. **Sargent CA, Anderson MJ, Hsieh SL, Kendall E, Gomez-Escobar N, Campbell RD** 1994 Characterisation of the novel gene G11 lying adjacent to the complement C4A gene in the human major histocompatibility complex. *Hum Mol Genet* 3:481-488
373. **Bristow J, Tee MK, Gitelman SE, Mellon SH, Miller WL** 1993 Tenascin-X: a novel extracellular matrix protein encoded by the human XB gene overlapping P450c21B. *J Cell Biol* 122:265-278
374. **Tee MK, Thomson AA, Bristow J, Miller WL** 1995 Sequences promoting the transcription of the human XA gene overlapping P450c21A correctly predict the presence of a novel, adrenal-specific, truncated form of tenascin-X. *Genomics* 28:171-178
375. **Bristow J, Gitelman SE, Tee MK, Staels B, Miller WL** 1993 Abundant adrenal-specific transcription of the human P450c21A "pseudogene." *J Biol Chem* 268:12919-12924
376. **Chang SF, Chung BC** 1995 Difference in transcriptional activity of two homologous CYP21A genes. *Mol Endocrinol* 9:1330-1336
377. **Endoh A, Yang L, Hornsby PJ** 1998 CYP21 pseudogene transcripts are much less abundant than those from the active gene in normal human adrenocortical cells under various conditions in culture. *Mol Cell Endocrinol* 137:13-19
378. **Speek M, Barry F, Miller WL** 1996 Alternate promoters and alternate splicing of human tenascin-X, a gene with 5' and 3' ends buried in other genes. *Hum Mol Genet* 5:1749-1758
379. **John ME, Okamura T, Dee A, Adler B, John MC, White PC, Simpson ER, Waterman MR** 1986 Bovine steroid 21-hydroxylase: regulation of biosynthesis. *Biochemistry* 25:2846-2853
380. **John ME, John MC, Boggaram V, Simpson ER, Waterman MR** 1986 Transcriptional regulation of steroid hydroxylase genes by corticotropin. *Proc Natl Acad Sci USA* 83:4715-4719
381. **Handler JD, Schimmer BP, Flynn TG, Szyf M, Seidman JG, Parker KL** 1988 An enhancer element and a functional cyclic AMP-dependent protein kinase are required for expression of adrenocortical 21-hydroxylase. *J Biol Chem* 263:13068-13073
382. **Bird IM, Mason JI, Rainey WE** 1998 Protein kinase A, protein kinase C, and Ca(2+)-regulated expression of 21-hydroxylase cytochrome P450 in H295R human adrenocortical cells. *J Clin Endocrinol Metab* 83:1592-1597
383. **Kyllo JH, Collins MM, Donohoue PA** 1995 Constitutive human steroid 21-hydroxylase promoter gene and pseudogene activity in steroidogenic and nonsteroidogenic cells with the luciferase gene as a reporter. *Endocr Res* 21:777-791
384. **Chin KK, Chang SF** 1998 The -104G nucleotide of the human CYP21 gene is important for CYP21 transcription activity and protein interaction. *Nucleic Acids Res* 26:1959-1964
385. **Kagawa N, Waterman MR** 1990 cAMP-dependent transcription of the human CYP21B (P-450C21) gene requires a cis-regulatory element distinct from the consensus cAMP-regulatory element. *J Biol Chem* 265:11299-11305
386. **Kagawa N, Waterman MR** 1991 Evidence that an adrenal-specific nuclear protein regulates the cAMP responsiveness of the human CYP21B (P450C21) gene. *J Biol Chem* 266:11199-11204
387. **Kagawa N, Waterman MR** 1992 Purification and characterization of a transcription factor which appears to regulate cAMP responsiveness of the human CYP21B gene. *J Biol Chem* 267:25213-25219
388. **Shannon MF, Pell LM, Lenardo MJ, Kuczek ES, Occhiodoro FS, nn SM, das MA** 1990 A novel tumor necrosis factor-responsive transcription factor which recognizes a regulatory element in hemopoietic growth factor genes. *Mol Cell Biol* 10:2950-2959
389. **Rice DA, Kronenberg MS, Mouw AR, Aitken LD, Franklin A, Schimmer BP, Parker KL** 1990 Multiple regulatory elements determine adrenocortical expression of steroid 21-hydroxylase. *J Biol Chem* 265:8052-8058
390. **Wilson TE, Mouw AR, Weaver CA, Milbrandt J, Parker KL** 1993 The orphan nuclear receptor NGFI-B regulates expression of the gene encoding steroid 21-hydroxylase. *Mol Cell Biol* 13:861-868
391. **Li Y, Lau LF** 1997 Adrenocorticotrophic hormone regulates the activities of the orphan nuclear receptor Nur77 through modulation of phosphorylation. *Endocrinology* 138:4138-4146
392. **Milstone DS, Shaw SK, Parker KL, Szyf M, Seidman JG** 1992 An element regulating adrenal-specific steroid 21-hydroxylase expression is located within the slp gene. *J Biol Chem* 267:21924-21927
393. **Talbot D, Collis P, Antoniou M, Vidal M, Grosveld F, Greaves DR** 1989 A dominant control region from the human  $\beta$ -globin locus conferring integration site-independent gene expression. *Nature* 338:352-355

394. **Morley SD, Viard I, Chung BC, Ikeda Y, Parker KL, Mullins JJ** 1996 Variegated expression of a mouse steroid 21-hydroxylase/ $\beta$ -galactosidase transgene suggests centripetal migration of adrenocortical cells. *Mol Endocrinol* 10:585–598
395. **Tee MK, Babalola GO, Aza-Blanc P, Speek M, Gitelman SE, Miller WL** 1995 A promoter within intron 35 of the human C4A gene initiates abundant adrenal-specific transcription of a 1 kb RNA: location of a cryptic CYP21 promoter element? *Hum Mol Genet* 4:2109–2116
396. **Gitelman SE, Bristow J, Miller WL** 1992 Mechanism and consequences of the duplication of the human C4/P450c21/gene  $\times$  locus [published erratum appears in *Mol Cell Biol* 1992 Jul; 12(7):3313–4]. *Mol Cell Biol* 12:2124–2134
397. **Dupont B, Oberfield SE, Smithwick EM, Lee TD, Levine LS** 1977 Close genetic linkage between HLA and congenital adrenal hyperplasia (21-hydroxylase deficiency). *Lancet* 2:1309–1312
398. **Levine LS, Zachmann M, New MI, Prader A, Pollack MS, O'Neill GJ, Yang SY, Oberfield SE, Dupont B** 1978 Genetic mapping of the 21-hydroxylase-deficiency gene within the HLA linkage group. *N Engl J Med* 299:911–915
399. **Pollack MS, Maurer D, Levine LS, New MI, Pang S, Duchon M, Owens RP, Merkatz IR, Nitowsky BM, Sachs G, Dupont B** 1979 Prenatal diagnosis of congenital adrenal hyperplasia (21-hydroxylase deficiency) by HLA typing. *Lancet* 1:1107–1108
400. **O'Neill GJ, Dupont B, Pollack MS, Levine LS, New MI** 1982 Complement C4 allotypes in congenital adrenal hyperplasia due to 21-hydroxylase deficiency: further evidence for different allelic variants at the 21-hydroxylase locus. *Clin Immunol Immunopathol* 23:312–322
401. **Fleischnick E, Awdeh ZL, Raum D, Granados J, Alosco SM, Crigler JFJ, Gerald PS, Giles CM, Yunis EJ, Alper CA** 1983 Extended MHC haplotypes in 21-hydroxylase-deficiency congenital adrenal hyperplasia: shared genotypes in unrelated patients. *Lancet* 1:152–156
402. **Donohoue PA, Guethlein L, Collins MM, Van Dop C, Migeon CJ, Bias WB, Schmeckpeper BJ** 1995 The HLA-A3, Cw6,B47,DR7 extended haplotypes in salt losing 21-hydroxylase deficiency and in the Old Order Amish: identical class I antigens and class II alleles with at least two crossover sites in the class III region. *Tissue Antigens* 46:163–172
403. **Laron Z, Pollack MS, Zamir R, Roitman A, Dickerman Z, Levine LS, Lorenzen F, O'Neill GJ, Pang S, New MI, Dupont B** 1980 Late onset 21-hydroxylase deficiency and HLA in the Ashkenazi population: a new allele at the 21-hydroxylase locus. *Hum Immunol* 1:55–66
404. **Pollack MS, Levine LS, O'Neill GJ, Pang S, Lorenzen F, Kohn B, Rondanini GF, Chiumello G, New MI, Dupont B** 1981 HLA linkage and B14, DR1, BfS haplotype association with the genes for late onset and cryptic 21-hydroxylase deficiency. *Am J Hum Genet* 33:540–550
405. **Werkmeister JW, New MI, Dupont B, White PC** 1986 Frequent deletion and duplication of the steroid 21-hydroxylase genes. *Am J Hum Genet* 39:461–469
406. **Garlepp MJ, Wilton AN, Dawkins RL, White PC** 1986 Rearrangement of 21-hydroxylase genes in disease-associated MHC supratypes. *Immunogenetics* 23:100–105
407. **Carroll MC, Palsdottir A, Belt KT, Porter RR** 1985 Deletion of complement C4 and steroid 21-hydroxylase genes in the HLA class III region. *EMBO J* 4:2547–2552
408. **Dunham I, Sargent CA, Trowsdale J, Campbell RD** 1987 Molecular mapping of the human major histocompatibility complex by pulsed-field gel electrophoresis. *Proc Natl Acad Sci USA* 84:7237–7241
409. **Carroll MC, Katzman P, Alicot EM, Koller BH, Geraghty DE, Orr HT, Strominger JL, Spies T** 1987 Linkage map of the human major histocompatibility complex including the tumor necrosis factor genes. *Proc Natl Acad Sci USA* 84:8535–8539
410. **White PC, Vitek A, Dupont B, New MI** 1988 Characterization of frequent deletions causing steroid 21-hydroxylase deficiency. *Proc Natl Acad Sci USA* 85:4436–4440
411. **Donohoue PA, Van Dop C, McLean RH, White PC, Jospe N, Migeon CJ** 1986 Gene conversion in salt-losing congenital adrenal hyperplasia with absent complement C4B protein. *J Clin Endocrinol Metab* 62:995–1002
412. **Harada F, Kimura A, Iwanaga T, Shimozawa K, Yata J, Sasazuki T** 1987 Gene conversion-like events cause steroid 21-hydroxylase deficiency in congenital hyperplasia. *Proc Natl Acad Sci USA* 84:8091–8094
413. **Higashi Y, Tanae A, Inoue H, Fujii-Kuriyama Y** 1988 Evidence for frequent gene conversion in the steroid 21-hydroxylase P-450(C21) gene: implications for steroid 21-hydroxylase deficiency. *Am J Hum Genet* 42:17–25
414. **Higashi Y, Tanae A, Inoue H, Hiromasa T, Fujii-Kuriyama Y** 1988 Aberrant splicing and missense mutations cause steroid 21-hydroxylase [P-450(C21)] deficiency in humans: possible gene conversion products. *Proc Natl Acad Sci USA* 85:7486–7490
415. **Amor M, Parker KL, Globerman H, New MI, White PC** 1988 Mutation in the CYP21B gene (Ile-172—Asn) causes steroid 21-hydroxylase deficiency. *Proc Natl Acad Sci USA* 85:1600–1604
416. **Globerman H, Amor M, Parker KL, New MI, White PC** 1988 Nonsense mutation causing steroid 21-hydroxylase deficiency. *J Clin Invest* 82:139–144
417. **Urabe K, Kimura A, Harada F, Iwanaga T, Sasazuki T** 1990 Gene conversion in steroid 21-hydroxylase genes. *Am J Hum Genet* 46:1178–1186
418. **Higashi Y, Hiromasa T, Tanae A, Miki T, Nakura J, Kondo T, Ohura T, Ogawa E, Nakayama K, Fujii-Kuriyama Y** 1991 Effects of individual mutations in the P-450(C21) pseudogene on the P-450(C21) activity and their distribution in the patient genomes of congenital steroid 21-hydroxylase deficiency. *J Biochem (Tokyo)* 109:638–644
419. **Mornet E, Crete P, Kuttann F, Raux-Demay MC, Boue J, White PC, Boue A** 1991 Distribution of deletions and seven point mutations on CYP21B genes in three clinical forms of steroid 21-hydroxylase deficiency. *Am J Hum Genet* 48:79–88
420. **Wedell A, Thilen A, Ritzen EM, Stengler B, Luthman H** 1994 Mutational spectrum of the steroid 21-hydroxylase gene in Sweden: implications for genetic diagnosis and association with disease manifestations. *J Clin Endocrinol Metab* 78:1145–1152
421. **Ezquieta B, Oliver A, Gracia R, Gancedo PG** 1995 Analysis of steroid 21-hydroxylase gene mutations in the Spanish population. *Hum Genet* 96:198–204
422. **Carrera P, Bordone L, Azzani T, Brunelli V, Garancini MP, Chiumello G, Ferrari M** 1996 Point mutations in Italian patients with classic, non-classic, and cryptic forms of steroid 21-hydroxylase deficiency. *Hum Genet* 98:662–665
423. **Levo A, Partanen J** 1997 Mutation-haplotype analysis of steroid 21-hydroxylase (CYP21) deficiency in Finland. Implications for the population history of defective alleles. *Hum Genet* 99:488–497
424. **Wedell A** 1998 Molecular genetics of congenital adrenal hyperplasia (21-hydroxylase deficiency): implications for diagnosis, prognosis and treatment. *Acta Paediatr* 87:159–164
425. **Rumsby G, Avey CJ, Conway GS, Honour JW** 1998 Genotype-phenotype analysis in late onset 21-hydroxylase deficiency in comparison to the classical forms. *Clin Endocrinol (Oxf)* 48:707–711
426. **Ko TM, Kao CH, Ho HN, Tseng LH, Hwa HL, Hsu PM, Chuang SM, Lee TY** 1998 Congenital adrenal hyperplasia. Molecular characterization. *J Reprod Med* 43:379–386
427. **Ordonez-Sanchez ML, Ramirez-Jimenez S, Lopez-Gutierrez AU, Riba L, Gamboa-Cardiel S, Cerrillo-Hinojosa M, Altamirano-Bustamante N, Calzada-Leon R, Robles-Valdes C, Mendoza-Morfin F, Tusie-Luna MT** 1998 Molecular genetic analysis of patients carrying steroid 21-hydroxylase deficiency in the Mexican population: identification of possible new mutations and high prevalence of apparent germ-line mutations. *Hum Genet* 102:170–177
428. **Dardis A, Bergada I, Bergada C, Rivarola M, Belgorosky A** 1997 Mutations of the steroid 21-hydroxylase gene in an Argentinian population of 36 patients with classical congenital adrenal hyperplasia. *J Pediatr Endocrinol Metab* 10:55–61
429. **Fardella CE, Poggi H, Pineda P, Soto J, Torrealba I, Cattani A, Oestreicher E, Foradori A** 1998 Salt-wasting congenital adrenal hyperplasia: detection of mutations in CYP21B gene in a Chilean population. *J Clin Endocrinol Metab* 83:3357–3360
430. **Bobba A, Marra E, Giannattasio S, Iolascon A, Monno F, Di Maio S** 1999 21-Hydroxylase deficiency in Italy: a distinct distribution

- pattern of CYP21 mutations in a sample from southern Italy. *J Med Genet* 36:648–650
431. **Lako M, Ramsden S, Campbell RD, Strachan T** 1999 Mutation screening in British 21-hydroxylase deficiency families and development of novel microsatellite based approaches to prenatal diagnosis. *J Med Genet* 36:119–124
  432. **Ferenczi A, Garami M, Kiss E, Pek M, Sasvari-Szekely M, Barta C, Staub M, Solyom J, Fekete G** 1999 Screening for mutations of 21-hydroxylase gene in Hungarian patients with congenital adrenal hyperplasia. *J Clin Endocrinol Metab* 84:2369–2372
  433. **Higashi Y, Fujii-Kuriyama Y** 1991 Functional analysis of mutant P450(C21) genes in COS cell expression system. *Methods Enzymol* 206:166–173
  434. **Hsu LC, Hsu NC, Guzova JA, Guzov VM, Chang SF, Chung BC** 1996 The common I172N mutation causes conformational change of cytochrome P450c21 revealed by systematic mutation, kinetic, and structural studies. *J Biol Chem* 271:3306–3310
  435. **Hu MC, Hsu LC, Hsu NC, Chung BC** 1996 Function and membrane topology of wild-type and mutated cytochrome P-450c21. *Biochem J* 316:325–329
  436. **Nikoshkov A, Lajic S, Holst M, Wedell A, Luthman H** 1997 Synergistic effect of partially inactivating mutations in steroid 21-hydroxylase deficiency. *J Clin Endocrinol Metab* 82:194–199
  437. **Nikoshkov A, Lajic S, Vlamis-Gardikas A, Tranebjaerg L, Holst M, Wedell A, Luthman H** 1998 Naturally occurring mutants of human steroid 21-hydroxylase (P450c21) pinpoint residues important for enzyme activity and stability. *J Biol Chem* 273:6163–6165
  438. **Tusie-Luna MT, Speiser PW, Dumic M, New MI, White PC** 1991 A mutation (Pro-30 to Leu) in CYP21 represents a potential non-classic steroid 21-hydroxylase deficiency allele. *Mol Endocrinol* 5:685–692
  439. **Helmberg A, Tusie-Luna MT, Tabarelli M, Kofler R, White PC** 1992 R339H and P453S: CYP21 mutations associated with nonclassical steroid 21-hydroxylase deficiency that are not apparent gene conversions. *Mol Endocrinol* 6:1318–1322
  440. **Wu DA, Hu MC, Chung BC** 1991 Expression and functional study of wild-type and mutant human cytochrome P450c21 in *Saccharomyces cerevisiae*. *DNA Cell Biol* 10:201–209
  441. **Hu MC, Chung BC** 1990 Expression of human 21-hydroxylase (P450c21) in bacterial and mammalian cells: a system to characterize normal and mutant enzymes. *Mol Endocrinol* 4:893–898
  442. **Gruol DJ, Bourgeois S** 1994 Expression of the mdr1 P-glycoprotein gene: a mechanism of escape from glucocorticoid-induced apoptosis. *Biochem Cell Biol* 72:561–571
  443. **Tusie-Luna MT, Ramirez-Jimenez S, Ordonez-Sanchez ML, Cabello-Villegas J, Altamirano-Bustamante N, Calzada-Leon R, Robles-Valdes C, Mendoza-Morfin F, Mendez JP, Teran-Garcia M** 1996 Low frequency of deletion alleles in patients with steroid 21-hydroxylase deficiency in a Mexican population. *Hum Genet* 98:376–379
  444. **Bachega TA, Billerbeck AE, Madureira G, Arnhold IJ, Medeiros MA, Marcondes JA, Longui CA, Nicolau W, Bloise W, Mendonca BB** 1999 Low frequency of CYP2B deletions in Brazilian patients with congenital adrenal hyperplasia due to 21-hydroxylase deficiency. *Hum Hered* 49:9–14
  445. **Donohoue PA, Jospe N, Migeon CJ, Van Dop C** 1989 Two distinct areas of unequal crossingover within the steroid 21-hydroxylase genes produce absence of CYP21B [published erratum appears in *Genomics* 1990 Feb; 6(2):392]. *Genomics* 5:397–406
  446. **Yang Z, Mendoza AR, Welch TR, Zipf WB, Yu CY** 1999 Modular variations of the human major histocompatibility complex class III genes for serine/threonine kinase RP, complement component C4, steroid 21-hydroxylase CYP21, and tenascin TNX (the RCCX module). A mechanism for gene deletions and disease associations. *J Biol Chem* 274:12147–12156
  447. **Schneider PM, Carroll MC, Alper CA, Rittner C, Whitehead AS, Yunis EJ, Colten HR** 1986 Polymorphism of the human complement C4 and steroid 21-hydroxylase genes. *J Clin Invest* 78:650–657
  448. **Collier S, Sinnott PJ, Dyer PA, Reincke M, Harris R, Strachan T** 1989 Pulsed field gel electrophoresis identifies a high degree of variability in the number of tandem 21-hydroxylase and complement C4 gene repeats in 21-hydroxylase deficiency haplotypes. *EMBO J* 8:1393–1402
  449. **Burch GH, Gong Y, Liu W, Dettman RW, Curry CJ, Smith L, Miller WL, Bristow J** 1997 Tenascin-X deficiency is associated with Ehlers-Danlos syndrome. *Nat Genet* 17:104–108
  450. **Donohoue PA, Jospe N, Migeon CJ, McLean RH, Bias WB, White PC, Van Dop C** 1986 Restriction maps and restriction fragment length polymorphisms of the human 21-hydroxylase genes [published erratum appears in *Biochem Biophys Res Commun* 1986 Jul 16; 138(1):503]. *Biochem Biophys Res Commun* 136:722–729
  451. **Mornet E, Couillin P, Kутten F, Raux MC, White PC, Cohen D, Boue A, Dausset J** 1986 Associations between restriction fragment length polymorphisms detected with a probe for human 21-hydroxylase (21-OH) and two clinical forms of 21-OH deficiency. *Hum Genet* 74:402–408
  452. **Rumsby G, Carroll MC, Porter RR, Grant DB, Hjelm M** 1986 Deletion of the steroid 21-hydroxylase and complement C4 genes in congenital adrenal hyperplasia. *J Med Genet* 23:204–209
  453. **Jospe N, Donohoue PA, Van Dop C, McLean RH, Bias WB, Migeon CJ** 1987 Prevalence of polymorphic 21-hydroxylase gene (CA21HB) mutations in salt-losing congenital adrenal hyperplasia. *Biochem Biophys Res Commun* 142:7987–804
  454. **Matteson KJ, Phillips JA, Miller WL, Chung BC, Orlando PJ, Frisch H, Ferrandez A, Burr IM** 1987 P450XXI (steroid 21-hydroxylase) gene deletions are not found in family studies of congenital adrenal hyperplasia. *Proc Natl Acad Sci USA* 84:5858–5862
  455. **Dawkins RL, Martin E, Kay PH, Garlepp MJ, Wilton AN, Stuckey MS** 1987 Heterogeneity of steroid 21-hydroxylase genes in classical congenital adrenal hyperplasia. *J Immunogenet* 14:89–98
  456. **Rumsby G, Fielder AH, Hague WM, Honour JW** 1988 Heterogeneity in the gene locus for steroid 21-hydroxylase deficiency. *J Med Genet* 25:596–599
  457. **Morel Y, Andre J, Uring-Lambert B, Hauptman G, Betuel H, Tossi M, Forest M, David M, Bertrand J, Miller WL** 1989 Rearrangements and point mutations of P450c21 genes are distinguished by five restriction endonuclease haplotypes identified by a new probing strategy in 57 families with congenital adrenal hyperplasia. *J Clin Invest* 83:527–536
  458. **Haglund-Stengler B, Ritzen EM, Luthman H** 1990 21-hydroxylase deficiency: disease-causing mutations categorized by densitometry of 21-hydroxylase-specific deoxyribonucleic acid fragments. *J Clin Endocrinol Metab* 70:43–48
  459. **Haglund-Stengler B, Martin Ritzen E, Gustafsson J, Luthman H** 1991 Haplotypes of the steroid 21-hydroxylase gene region encoding mild steroid 21-hydroxylase deficiency. *Proc Natl Acad Sci USA* 88:8352–8356
  460. **Strumberg D, Hauffa BP, Horsthemke B, Grosse-Wilde H** 1992 Molecular detection of genetic defects in congenital adrenal hyperplasia due to 21-hydroxylase deficiency: a study of 27 families. *Eur J Pediatr* 151:821–826
  461. **Lobato MN, Aledo R, Meseguer A** 1998 High variability of CYP21 gene rearrangements in Spanish patients with classic form of congenital adrenal hyperplasia. *Hum Hered* 48:216–225
  462. **Dunham I, Sargent CA, Dawkins RL, Campbell RD** 1989 Direct observation of the gene organization of the complement C4 and 21-hydroxylase loci by pulsed field gel electrophoresis. *J Exp Med* 169:1803–1818
  463. **Zhang WJ, Degli-Esposti MA, Cobain TJ, Cameron PU, Christiansen FT, Dawkins RL** 1990 Differences in gene copy number carried by different MHC ancestral haplotypes. Quantitation after physical separation of haplotypes by pulsed field gel electrophoresis. *J Exp Med* 171:2101–2114
  464. **Suto Y, Tokunaga K, Watanabe Y, Hirai M** 1996 Visual demonstration of the organization of the human complement C4 and 21-hydroxylase genes by high-resolution fluorescence *in situ* hybridization. *Genomics* 33:321–324
  465. **Kohn B, Day D, Alemzadeh R, Enerio D, Patel SV, Pelczar JV, Speiser PW** 1995 Splicing mutation in CYP21 associated with delayed presentation of salt-wasting congenital adrenal hyperplasia. *Am J Med Genet* 57:450–454
  466. **Day DJ, Speiser PW, Schultz E, Bettendorf M, Fitness J, Barany F, White PC** 1996 Identification of non-amplifying CYP21 genes when using PCR-based diagnosis of 21-hydroxylase deficiency in congenital adrenal hyperplasia (CAH) affected pedigrees. *Hum Mol Genet* 5:2039–2048

467. Tajima T, Fujieda K, Mikami A, Igarashi Y, Nakae J, Cutler Jr GB 1998 Prenatal diagnosis of steroid 21-hydroxylase deficiency by the modified polymerase chain reaction to detect splice site mutation in the CYP21 gene. *Endocr J* 45:291–295
468. Hsu LC, Hu MC, Cheng HC, Lu JC, Chung BC 1993 The N-terminal hydrophobic domain of P450c21 is required for membrane insertion and enzyme stability. *J Biol Chem* 268:14682–14686
469. Lajic S, Nikoshkov A, Holst M, Wedell A 1999 Effects of missense mutations and deletions on membrane anchoring and enzyme function of human steroid 21-hydroxylase (P450c21). *Biochem Biophys Res Commun* 257:384–390
470. Ishihara N, Yamashina S, Sakaguchi M, Mihara K, Omura T 1995 Malfolded cytochrome P-450(M1) localized in unusual membrane structures of the endoplasmic reticulum in cultured animal cells. *J Biochem (Tokyo)* 118:397–404
471. Monier S, Van Luc P, Kreibich G, Sabatini DD, Adesnik M 1988 Signals for the incorporation and orientation of cytochrome P450 in the endoplasmic reticulum membrane. *J Cell Biol* 107:457–470
472. Owerbach D, Sherman L, Ballard AL, Azziz R 1992 Pro-453 to Ser mutation in CYP21 is associated with nonclassical steroid 21-hydroxylase deficiency. *Mol Endocrinol* 6:1211–1215
473. Wedell A, Ritzen EM, Haglund-Stengler B, Luthman H 1992 Steroid 21-hydroxylase deficiency: three additional mutated alleles and establishment of phenotype-genotype relationships of common mutations. *Proc Natl Acad Sci USA* 89:7232–7236
474. Lajic S, Wedell A 1996 An intron 1 splice mutation and a nonsense mutation (W23X) in CYP21 causing severe congenital adrenal hyperplasia. *Hum Genet* 98:182–184
475. Nunez BS, Lobato MN, White PC, Meseguer A 1999 Functional analysis of four CYP21 mutations from spanish patients with congenital adrenal hyperplasia. *Biochem Biophys Res Commun* 262:635–637
476. Krone N, Roscher AA, Schwarz HP, Braun A 1998 Comprehensive analytical strategy for mutation screening in 21-hydroxylase deficiency. *Clin Chem* 44:2075–2082
477. Levo A, Partanen J 1997 Novel nonsense mutation (W302X) in the steroid 21-hydroxylase gene of a Finnish patient with the salt-wasting form of congenital adrenal hyperplasia. *Hum Mutat* 9:363–365
478. Lee HH, Chao HT, Lee YJ, Shu SG, Chao MC, Kuo JM, Chung BC 1998 Identification of four novel mutations in the CYP21 gene in congenital adrenal hyperplasia in the Chinese. *Hum Genet* 103:304–310
479. Kirby-Keyser L, Porter CC, Donohoue PA 1997 E380D: a novel point mutation of CYP21 in an HLA-homozygous patient with salt-losing congenital adrenal hyperplasia due to 21-hydroxylase deficiency. *Hum Mutat* 9:181–182
480. Wedell A, Luthman H 1993 Steroid 21-hydroxylase deficiency: two additional mutations in salt-wasting disease and rapid screening of disease-causing mutations. *Hum Mol Genet* 2:499–504
481. Billerbeck AE, Bachega TA, Frazzato ET, Nishi MY, Goldberg AC, Marin ML, Madureira G, Monte O, Arnhold IJ, Mendonca BB 1999 A novel missense mutation, GLY524SER, in Brazilian patients with 21-hydroxylase deficiency. *J Clin Endocrinol Metab* 84:2870–2872
482. Wedell A, Luthman H 1993 Steroid 21-hydroxylase (P450c21): a new allele and spread of mutations through the pseudogene. *Hum Genet* 91:236–240
483. Ezquieta B, Oyarzabal M, Jariago CM, Varela JM, Chueca M 1999 A novel frameshift mutation in the first exon of the 21-OH gene found in homozygosity in an apparently nonconsanguineous family. *Horm Res* 51:135–141
484. Krone N, Braun A, Roscher AA, Schwarz HP 1999 A novel frameshift mutation (141delT) in exon 1 of the 21-hydroxylase gene (CYP21) in a patient with the salt wasting form of congenital adrenal hyperplasia. *Mutation in brief no. 255*. Online. *Hum Mutat* 14:90–91
485. Witchel SF, Smith R, Suda-Hartman M 1999 Identification of CYP21 mutations, one novel, by single strand conformational polymorphism (SSCP) analysis. *Mutations in brief no. 218*. Online. *Hum Mutat* 13:172
486. Nimkarn S, Cerame BI, Wei JQ, Dunic M, Zunec R, Brkljacic L, Skrabic V, New MI, Wilson RC 1999 Congenital adrenal hyperplasia (21-hydroxylase deficiency) without demonstrable genetic mutations. *J Clin Endocrinol Metab* 84:378–381
487. Donohoue PA, Sandrini Neto R, Collins MM, Migeon CJ 1990 Exon 7 NcoI restriction site within CYP21B (steroid 21-hydroxylase) is a normal polymorphism. *Mol Endocrinol* 4:1354–1362
488. Sinnott P, Collier S, Costigan C, Dyer PA, Harris R, Strachan T 1990 Genesis by meiotic unequal crossover of a *de novo* deletion that contributes to steroid 21-hydroxylase deficiency. *Proc Natl Acad Sci USA* 87:2107–2111
489. Hejtmanck JF, Black S, Harris S, Ward PA, Callaway C, Ledbetter D, Morris J, Leech SH, Pollack MS 1992 Congenital 21-hydroxylase deficiency as a new deletion mutation. Detection in a proband during subsequent prenatal diagnosis by HLA typing and DNA analysis. *Hum Immunol* 35:246–252
490. Collier S, Tassabehji M, Strachan T 1993 A *de novo* pathological point mutation at the 21-hydroxylase locus: implications for gene conversion in the human genome. *Nat Genet* 3:260–265
491. Tusie-Luna MT, White PC 1995 Gene conversions and unequal crossovers between CYP21 (steroid 21-hydroxylase gene) and CYP21P involve different mechanisms. *Proc Natl Acad Sci USA* 92:10796–10800
492. Wyatt RT, Rudders RA, Zelenetz A, Delellis RA, Krontiris TG 1992 BCL2 oncogene translocation is mediated by a chi-like consensus. *J Exp Med* 175:1575–1588
493. Cargill M, Altshuler D, Ireland J, Sklar P, Ardlie K, Patil N, Lane CR, Lim EP, Kalayanaraman N, Nemesh J, Ziaugra L, Friedland L, Rolfe A, Warrington J, Lipshutz R, Daley GQ, Lander ES 1999 Characterization of single-nucleotide polymorphisms in coding regions of human genes. *Nat Genet* 22:231–238
494. Jiddou RR, Wei WL, Sane KS, Killeen AA 1999 Single-nucleotide polymorphisms in intron 2 of CYP21P: evidence for a higher rate of mutation at CpG dinucleotides in the functional steroid 21-hydroxylase gene and application to segregation analysis in congenital adrenal hyperplasia. *Clin Chem* 45:625–629
495. Wudy SA, Dorr HG, Solleder C, Djalali M, Homoki J 1999 Profiling steroid hormones in amniotic fluid of midpregnancy by routine stable isotope dilution/gas chromatography-mass spectrometry: reference values and concentrations in fetuses at risk for 21-hydroxylase deficiency. *J Clin Endocrinol Metab* 84:2724–2728
496. Pang S, Pollack MS, Loo M, Green O, Nussbaum R, Clayton G, Dupont B, New MI 1985 Pitfalls of prenatal diagnosis of 21-hydroxylase deficiency congenital adrenal hyperplasia. *J Clin Endocrinol Metab* 61:89–97
497. Maurer DH, Pollack MS 1985 The use of gamma interferon to increase HLA antigen expression on cultured amniotic cells used for the prenatal diagnosis of 21-hydroxylase deficiency. *Ann NY Acad Sci* 458:148–155
498. Dunic M, Brkljacic L, Plavsic V, Zunec R, Ille J, Wilson RC, Kuvacic I, Kastelan A, New MI 1997 Prenatal diagnosis of congenital adrenal hyperplasia (21-hydroxylase deficiency) in Croatia. *Am J Med Genet* 72:302–306
499. Reindollar RH, Lewis JB, White PC, Fernhoff PM, McDonough PG, Whitney JB 1988 Prenatal diagnosis of 21-hydroxylase deficiency by the complementary deoxyribonucleic acid probe for cytochrome P-450C-21OH [published erratum appears in *Am J Obstet Gynecol* 1988 Jun; 158(6 Pt 1):1445]. *Am J Obstet Gynecol* 158:545–547
500. Raux-Demay M, Mornet E, Boue J, Couillin P, Oury JF, Ravise N, Deluchat C, Boue A 1989 Early prenatal diagnosis of 21-hydroxylase deficiency using amniotic fluid 17-hydroxyprogesterone determination and DNA probes. *Prenat Diagn* 9:457–466
501. Keller E, Andreas A, Scholz S, Dorr HC, Knorr D, Albert ED 1991 Prenatal diagnosis of 21-hydroxylase deficiency by RFLP analysis of the 21-hydroxylase, complement C4, and HLA class II genes. *Prenat Diagn* 11:827–840
502. Owerbach D, Crawford YM, Draznin MB 1990 Direct analysis of CYP21B genes in 21 hydroxylase deficiency using polymerase chain reaction amplification. *Mol Endocrinol* 4:125–131
503. Owerbach D, Ballard AL, Draznin MB 1992 Salt-wasting congenital adrenal hyperplasia: detection and characterization of mutations in the steroid 21-hydroxylase gene, CYP21, using the polymerase chain reaction. *J Clin Endocrinol Metab* 74:553–558
504. Owerbach D, Draznin MB, Carpenter RJ, Greenberg F 1992 Pre-

- natal diagnosis of 21-hydroxylase deficiency congenital adrenal hyperplasia using the polymerase chain reaction. *Hum Genet* 89: 109–110
505. **Speiser PW, New MI, Tannin GM, Pickering D, Yang SY, White PC** 1992 Genotype of Yupik Eskimos with congenital adrenal hyperplasia due to 21-hydroxylase deficiency. *Hum Genet* 88:647–648
  506. **Rumsby G, Honour JW, Rodeck C** 1993 Prenatal diagnosis of congenital adrenal hyperplasia by direct detection of mutations in the steroid 21-hydroxylase gene. *Clin Endocrinol (Oxf)* 38:421–425
  507. **Speiser PW, White PC, Dupont J, Zhu D, Mercado AB, New MI** 1994 Prenatal diagnosis of congenital adrenal hyperplasia due to 21-hydroxylase deficiency by allele-specific hybridization and Southern blot. *Hum Genet* 93:424–428
  508. **Paulino LC, Araujo M, Guerra GJ, Marini SH, De Mello MP** 1999 Mutation distribution and CYP21/C4 locus variability in Brazilian families with the classical form of the 21-hydroxylase deficiency. *Acta Paediatr* 88:275–283
  509. **Morel Y, Murena M, Nicolino M, Carel JC, David M, Forest MG,** Correlation between genetic lesions of the CYP21B gene and the clinical forms of congenital adrenal hyperplasia due to 21-hydroxylase deficiency: report of a large study of 355 CAH chromosomes. *Horm Res* 37 [Suppl 4]:13 (Abstract)
  510. **Chung BC, Hu MC, Guzov VM, Wu DA** 1995 Structure and expression of the CYP21 (P450c21, steroid 21-hydroxylase) gene with respect to its deficiency. *Endocr Res* 21:343–352
  511. **Lee HH, Chao HT, Ng HT, Choo KB** 1996 Direct molecular diagnosis of CYP21 mutations in congenital adrenal hyperplasia. *J Med Genet* 33:371–375
  512. **Oriola J, Plensa I, Machuca I, Pavia C, Rivera-Fillat F** 1997 Rapid screening method for detecting mutations in the 21-hydroxylase gene. *Clin Chem* 43:557–561
  513. **Tajima T, Mikami A, Fukushi M, Nakae J, Kikuchi Y, Fujieda K** 1997 Conventional molecular diagnosis of steroid 21-hydroxylase deficiency using mismatched primers and polymerase chain reaction. *Endocr Res* 23:231–244
  514. **Van de Velde H, Sermon K, De Vos A, Lissens W, Joris H, Vandervorst M, Van Steirteghem A, Liebaers I** 1999 Fluorescent PCR and automated fragment analysis in preimplantation genetic diagnosis for 21-hydroxylase deficiency in congenital adrenal hyperplasia. *Mol Hum Reprod* 5:691–696
  515. **Tajima T, Fujieda K, Nakayama K, Fujii-Kuriyama Y** 1993 Molecular analysis of patient and carrier genes with congenital steroid 21-hydroxylase deficiency by using polymerase chain reaction and single strand conformation polymorphism. *J Clin Invest* 92:2182–2190
  516. **Siegel SF, Hoffman EP, Trucco M** 1994 Molecular diagnosis of 21-hydroxylase deficiency: detection of four mutations on a single gel. *Biochem Med Metab Biol* 51:66–73
  517. **Bobba A, Iolascon A, Giannattasio S, Albrizio M, Sinisi A, Prisco F, Schettini F, Marra E** 1997 Characterisation of CAH alleles with non-radioactive DNA single strand conformation polymorphism analysis of the CYP21 gene. *J Med Genet* 34:223–228
  518. **Hayashi Z, Orimo H, Araki T, Shimada T** 1997 Prenatal diagnosis of steroid 21-hydroxylase deficiency by analysis of polymerase chain reaction-single strand conformation polymorphism (PCR-SSCP) profiles. *Prenat Diagn* 17:435–442
  519. **Reindollar RH, Su BC, Bayer SR, Gray MR** 1992 Rapid identification of deoxyribonucleic acid sequence differences in cytochrome P-450 21-hydroxylase (CYP21) genes with denaturing gradient gel blots. *Am J Obstet Gynecol* 166:184–191
  520. **Ohlsson G, Muller J, Schwartz M** 1999 Genetic diagnosis of 21-hydroxylase deficiency: DGGE-based mutation scanning of CYP21. *Hum Mut* 13:385–389
  521. **Wilson RC, Wei JQ, Cheng KC, Mercado AB, New MI** 1995 Rapid deoxyribonucleic acid analysis by allele-specific polymerase chain reaction for detection of mutations in the steroid 21-hydroxylase gene. *J Clin Endocrinol Metab* 80:1635–1640
  522. **Carrera P, Barbieri AM, Ferrari M, Righetti PG, Perego M, Gelfi C** 1997 Rapid detection of 21-hydroxylase deficiency mutations by allele-specific *in vitro* amplification and capillary zone electrophoresis. *Clin Chem* 43:2121–2127
  523. **Day DJ, Speiser PW, White PC, Barany F** 1995 Detection of steroid 21-hydroxylase alleles using gene-specific PCR and a multiplexed ligation detection reaction. *Genomics* 29:152–162
  524. **Hacia JG** 1999 Resequencing and mutational analysis using oligonucleotide microarrays. *Nat Genet* 21:42–47
  525. **Ohlsson G, Schwartz M** 1997 Mutations in the gene encoding 21-hydroxylase detected by solid-phase minisequencing. *Hum Genet* 99:98–102
  526. **Ezquieta B, Jariego C, Varela JM, Oliver A, Gracia R** 1997 Microsatellite markers in the indirect analysis of the steroid 21-hydroxylase gene. *Prenat Diagn* 17:429–434
  527. **Jaaskelainen J, Levo A, Voutilainen R, Partanen J** 1997 Population-wide evaluation of disease manifestation in relation to molecular genotype in steroid 21-hydroxylase (CYP21) deficiency: good correlation in a well defined population. *J Clin Endocrinol Metab* 82:3293–3297
  528. **Schulze E, Scharer G, Rogatzki A, Priebe L, Lewwicka S, Bettendorf M, Hoepffner W, Heinrich UE, Schwabe U** 1995 Divergence between genotype and phenotype in relatives of patients with the intron 2 mutation of steroid 21-hydroxylase. *Endocr Res* 21:359–364
  529. **Witchel SF, Bhamidipati DK, Hoffman EP, Cohen JB** 1996 Phenotypic heterogeneity associated with the splicing mutation in congenital adrenal hyperplasia due to 21-hydroxylase deficiency. *J Clin Endocrinol Metab* 81:4081–4088
  530. **Rumsby G, Massoud AF, Avey C, Brook CG** 1996 Non-expression of a common mutation in the 21-hydroxylase gene: implications for prenatal diagnosis and carrier testing. *J Med Genet* 33:798–799
  531. **Wedell A, Stengler B, Luthman H** 1994 Characterization of mutations on the rare duplicated C4/CYP21 haplotype. *Hum Genet* 94:50–54
  532. **Zlotogora J** 1994 High frequencies of human genetic diseases: founder effect with genetic drift or selection?. *Am J Med Genet* 49:10–13
  533. **Black FL, Hedrick PW** 1997 Strong balancing selection at HLA loci: evidence from segregation in South Amerindian families. *Proc Natl Acad Sci USA* 94:12452–12456
  534. **Carrington M, Nelson GW, Martin MP, Kissner T, Vlahov D, Goedert JJ, Kaslow R, Buchbinder S, Hoots K, O'Brien SJ** 1999 HLA and HIV-1: heterozygote advantage and B\*35-Cw\*04 disadvantage. *Science* 283:1748–1752
  535. **Awdeh ZL, Raum D, Yunis EJ, Alper CA** 1983 Extended HLA/complement allele haplotypes: evidence for T/t-like complex in man. *Proc Natl Acad Sci USA* 80:259–263
  536. **Fraser LR, Dudley K** 1999 New insights into the t-complex and control of sperm function. *Bioessays* 21:304–312
  537. **Witchel SF, Lee PA, Suda-Hartman M, Trucco M, Hoffman EP** 1997 Evidence for a heterozygote advantage in congenital adrenal hyperplasia due to 21-hydroxylase deficiency. *J Clin Endocrinol Metab* 82:2097–2101
  538. **Wilckens T** 1997 21-Hydroxylase heterozygosity and immune regulation. *J Clin Endocrinol Metab* 82:4275–4276
  539. **Cartigny-Maciejewski M, Guilley N, Vanderbecken S, Gonde S, Stuckens C, Ponte C, Weill J, Farriaux JP, Paux E** 1999 [Neonatal screening of congenital adrenal hyperplasia due to 21-hydroxylase deficiency: Lille experience 1980–1996]. [French]. *Arch Pediatr* 6:151–158
  540. **Hsu NC, Guzov VM, Hsu LC, Chung BC** 1999 Characterization of the consequence of a novel Glu-380 to Asp mutation by expression of functional P450c21 in *Escherichia coli*. *Biochim Biophys Acta* 1430:95–102
  541. **Barthold JS, Gonzalez R** 1999 Intersex states. In: Gonzales ET, Bauer SB (eds) *Pediatric Urology Practice*. Lippincott Williams & Wilkins, Philadelphia, pp 547–578
